# Supplementary material for: Intersectoral and integrated approaches in achieving the right to health for refugees on resettlement: a scoping review
Source: PubMed Central journal article supplement — BMJ Open. 2019 Jul 1;9(7):e029407. doi: 10.1136/bmjopen-2019-029407 (PMC6609038; doi:10.1136/bmjopen-2019-029407), 2019-07-01
Supplement: bmjopen-2019-029407.draft_revisions.pdf [file bmjopen-2019-029407.draft_revisions.pdf]

# BMJ Open

BMJ Open is committed to open peer review. As part of this commitment we make the peer review history of every article we publish publicly available.

When an article is published we post the peer reviewers' comments and the authors' responses online. We also post the versions of the paper that were used during peer review. These are the versions that the peer review comments apply to.

The versions of the paper that follow are the versions that were submitted during the peer review process. They are not the versions of record or the final published versions. They should not be cited or distributed as the published version of this manuscript.

BMJ Open is an open access journal and the full, final, typeset and author-corrected version of record of the manuscript is available on our site with no access controls, subscription charges or pay-per-view fees (<http://bmjopen.bmj.com>).

If you have any questions on BMJ Open's open peer review process please email [info.bmjopen@bmj.com](mailto:info.bmjopen@bmj.com)

# BMJ Open

## Intersectoral and integrated approaches in achieving the right to health for refugees upon resettlement: A scoping review

|                               |                                                                                                                                                                                                                       |
|-------------------------------|-----------------------------------------------------------------------------------------------------------------------------------------------------------------------------------------------------------------------|
| Journal:                      | <i>BMJ Open</i>                                                                                                                                                                                                       |
| Manuscript ID                 | bmjopen-2019-029407                                                                                                                                                                                                   |
| Article Type:                 | Research                                                                                                                                                                                                              |
| Date Submitted by the Author: | 25-Jan-2019                                                                                                                                                                                                           |
| Complete List of Authors:     | Ho, Shirley; World Health Organization, Javadi, Dena; World Health Organization Causevic, Sara<br>Langlois, Etienne V.; WHO<br>Friberg, Peter; Medicine, Clinical Physiology<br>Tomson, Göran ; Karolinska Institutet |
| Keywords:                     | intersectoral, right to health, access, refugees, integration, resettlement                                                                                                                                           |
|                               |                                                                                                                                                                                                                       |

SCHOLARONE™  
Manuscripts

1  
2  
3 1 **Intersectoral and integrated approaches in achieving the right to health**  
4  
5 2 **for refugees upon resettlement: A scoping review**  
6  
7  
8 3  
9

10 4 Shirley Ho\*<sup>1</sup> email: shirleyyingho@gmail.com  
11 5 Dena Javadi <sup>1</sup> email: javadid@who.int  
12 6 Sara Causevic<sup>2,3</sup> email: sara.causevic@ki.se  
13 7 Etienne V. Langlois<sup>1</sup> email: langloise@who.int  
14 8 Peter Friberg<sup>2,5</sup> email: peter.friberg@mednet.gu.se  
15 9 Goran Tomson<sup>2,4</sup> email: Goran.Tomson@ki.se  
16  
17 10

18 11 <sup>1</sup> Alliance for Health Policy and Systems Research, World Health Organization, Avenue Appia 20, 1211 Geneva,  
19 12 Switzerland

20 13 <sup>2</sup> Swedish Institute for Global Health Transformation, SIGHT, Royal Swedish Academy of Science, Stockholm,  
21 14 Sweden

22 15 <sup>3</sup> Global and Sexual Health, Department of Public Health Sciences, Karolinska Institutet, Stockholm, Sweden

23 16 <sup>4</sup> Medical Management Centre, Department of Learning, Informatics, Management, Ethics (LIME), Karolinska  
24 17 Institutet, Stockholm, Sweden

25 18 <sup>5</sup> Institute of Medicine, Sahlgrenska Academy at Gothenburg university and Sahlgrenska university hospital  
26 19  
27 20  
28

29 21 **\*Corresponding Author:**

30 22 Shirley Ho, shirleyyingho@gmail.com

31 23 Alliance for Health Policy and Systems Research, World Health Organization  
32 24  
33  
34

35 25 **Keywords:** intersectoral, right to health, access, refugees, integration, resettlement  
36  
37 26  
38  
39 27  
40  
41  
42  
43  
44  
45  
46  
47  
48  
49  
50  
51  
52  
53  
54  
55  
56  
57  
58  
59  
60

Word count: 4,115

1  
2  
3 28 **ABSTRACT (300/300)**  
4

5 29 **Background:** Better understanding, documentation, and evaluation of different refugee health  
6  
7 30 interventions, and their means of health system integration and intersectoral collaboration are needed

8  
9 31 **Objectives:** Explore the barriers and facilitators to the integration of health services for refugees; the  
10  
11 32 process and actors involved; and the extent to which intersectoral approaches are leveraged to  
12  
13 33 protect refugees' right to health on resettlement

14 34 **Design:** Scoping Review

15  
16 35 **Methods:** A search of articles from 2000 onward was done in MEDLINE, Web of Science, Global  
17  
18 36 Health, and PsycInfo Embase. Two frameworks were applied in our analysis, the "Framework for  
19  
20 37 analyzing integration of targeted health interventions in systems", and "Health in All Policies"  
21  
22 38 framework for country action. A comprehensive description of the methods is included in our  
23  
24 39 published protocol.

25 40 **Results:** Limited evidence was found overall. 6,117 papers were identified, only 18 studies met  
26  
27 41 the inclusion criteria. Successful strategies to address refugee health included: networks of  
28  
29 42 service delivery combining existing public and private services; system navigators; host  
30  
31 43 community engagement to reduce stigma; translation services; legislative support; appropriate  
32  
33 44 funding models; and alternative models of care for women and children. Facilitators in  
34  
35 45 implementation included: communication of program availability; training for providers;  
36  
37 46 colocation of services; transportation services to enhance access; clear role definitions; and  
38  
39 47 innovation in financing. Barriers included: lack of a participatory approach; stigma leading to  
40  
41 48 underuse of services; insufficient resources for providers; absence of financing models; unclear  
42  
43 49 roles and insufficient coordination of inter professional teams; low availability and use of data;  
44  
45 50 and turf wars across governance stakeholders.

46  
47 51 **Conclusion:** Key policy insights include: improving coordination between existing programmes  
48  
49 52 through financing stronger data collection and referral systems, supporting colocation of services;  
50  
51 53 establishing formal system navigator roles that connect all relevant services; engaging host  
52  
53 54 communities to reduce stigma; establishing formal translation and transport services to improve  
54  
55 55 access; and establishing training and providers' resources.

56  
57 56  
58  
59 57 **Registration:** Registered on Open Science Framework at <https://osf.io/gt9ck/>  
60

## 58 **Strengths and limitations of this study**

- 59 • Our study uses a systematic approach by using two frameworks for integration and  
60 intersectoral action, the “Framework for analyzing integration of targeted health  
61 interventions in systems”, and “Health in All Policies” framework for country action to  
62 develop a strong evidence base in understanding the processes and actors involved
- 63 • The lack of evidence on intersectoral and integrated approaches from low-income and  
64 middle-income countries may impact the generalizability of the findings
- 65 • Our findings can be applied for policy and action aiming to enhance the integration of  
66 refugee health services within health systems and multisectoral collaboration, and  
67 identifying research needs to advance the right to health for refugees.

## 68 **INTRODUCTION**

69 Upholding the right to health is a fundamental challenge for governments worldwide,  
70 particularly when providing services to vulnerable or hard to reach populations such as refugees.  
71 The Office of the United Nations High Commission for Human Rights (OHCHR) identifies the  
72 right to health as a fundamental part of human rights, first articulated in the 1946 Constitution of  
73 the World Health Organization (WHO).<sup>1</sup> Entitlements under the right to health include universal  
74 health coverage – now a target under Sustainable Development Goal (SDG) 3 – broadly covering  
75 access to preventative and curative services, essential medicines, timely basic health services,  
76 health-related education, participation in health-related decision making at both national and  
77 community levels, as well as financial protection.<sup>1,2</sup> Especially relevant to the plight of refugees,  
78 the right to health includes non-discrimination whereby health services, commodities and  
79 facilities must be provided to all without any discrimination. Lastly, these health services must

1  
2  
3 80 be accessible, medically and culturally appropriate, available in adequate amount and quality,  
4  
5 81 which includes having a trained health workforce, safe products and adequate sanitation.<sup>2</sup>  
6  
7

8 82 Different in definition from the term “migrant,” “refugees” are those fleeing armed  
9  
10 83 conflict or persecution as defined by the 1951 Refugee Convention which also identifies their  
11  
12 84 basic rights, specifically that refugees should not be returned to situations that are deemed a  
13  
14 85 threat to their life or freedom.<sup>3</sup> A key distinction is that refugee rights are not only a matter of  
15  
16 86 national legislation, but also of international law.<sup>4</sup> Despite these legal protections, refugees face  
17  
18 87 many challenges in accessing health services, especially more vulnerable groups like women and  
19  
20 88 children.<sup>5</sup> Many states explicitly exclude refugees from the level of protection afforded to their  
21  
22 89 citizens, instead choosing to offer “essential care” or “emergency health care,” which is  
23  
24 90 differentially defined across countries.<sup>6</sup> The Committee on the Elimination of Racial  
25  
26 91 Discrimination, and the Committee on Economic, Social and Cultural Rights, both include  
27  
28 92 general comments that hold States accountable to “the right of non-citizens to an adequate  
29  
30 93 standard of physical and mental health by, inter alia, refraining from denying or limiting their  
31  
32 94 access to preventive, curative and palliative health services”.<sup>7</sup> The increasing number of refugees  
33  
34 95 over the past years makes the realization and protection of these rights both a legal, ethical and a  
35  
36 96 logistical challenge.<sup>5</sup> In addition, the boundaries of the right to health have expanded due to  
37  
38 97 increased understanding of social determinants of health and the health impacts of the lived  
39  
40 98 environment.<sup>8,9</sup> Refugees face challenges in navigating health, legal, education, housing, social  
41  
42 99 protection and employment services, which further threatens their quality of life and health  
43  
44 100 status.<sup>10</sup> A lack of coordination and integration across these services undermines their  
45  
46 101 effectiveness.<sup>11</sup>  
47  
48  
49  
50  
51  
52  
53  
54  
55  
56  
57  
58  
59  
60

1  
2  
3 102 Much like the shift from the more vertical approaches of the millennium development  
4  
5 103 goals (MDGs) towards the more integrated SDGs, the protection of the right to health calls for an  
6  
7 104 intersectoral approach whereby health is applied to all policies for all people.<sup>12</sup> Therefore, for  
8  
9  
10 105 states to effectively protect the right to health for refugees there is a need to work across sectors  
11  
12 106 and disciplines to better integrate targeted programmes and initiatives, thereby improving  
13  
14 107 standards of care during resettlement. Some evidence exists that supporting collaboration and  
15  
16 108 coordination across social services for refugees improves the effectiveness and quality of care  
17  
18 109 received.<sup>10</sup> Many fragmented psychosocial programmes exist across sectors to attempt to address  
19  
20 110 the unique challenges faced by refugees but these are largely unevaluated and lack  
21  
22 111 sustainability.<sup>13,14</sup> Better understanding, documentation, evaluation and reporting of the dynamic  
23  
24 112 nature of different interventions, and their means of health system integration and intersectoral  
25  
26 113 collaboration, are necessary to ensure that lessons learned are implemented in the design of  
27  
28 114 future policies and programmes.

29  
30  
31  
32  
33 115 Therefore, we conducted a scoping review that describes the process and actors involved  
34  
35 116 in protecting refugee health; the barriers and facilitators to health promotion services for  
36  
37 117 refugees; and the extent to which intersectoral approaches and integration of services are  
38  
39 118 leveraged to protect refugees' right to health upon resettlement. We focused on the specific  
40  
41 119 research questions:

- 42  
43  
44 120 (1) What are the barriers and facilitators in integrating targeted services for refugees within  
45  
46 121 existing health systems?  
47  
48 122 (2) What strategies are involved in addressing refugees' right to health upon resettlement?  
49  
50 123 (3) To what extent are intersectoral approaches used to protect refugees' right to health,  
51  
52 124 particularly in women and children?  
53  
54  
55  
56  
57  
58  
59  
60

## 125 **METHODS**

### 126 **Study Design**

127 We selected the scoping review method because we were interested in mapping the concepts  
128 relevant to the complex nature of this topic, the changing global landscape around it, and the  
129 emerging and diverse knowledge-base, which makes the method well-matched to our research  
130 objectives.<sup>15,16</sup> We drafted a scoping review protocol following the methods outlined by the  
131 Joanna Briggs Institute Methods Manual for scoping reviews.<sup>17</sup> Our protocol was registered with  
132 the Open Science Framework,<sup>18</sup> and published in BMJ Open.<sup>19</sup> Since our full methods are  
133 available in the published protocol, a summary is provided below.

### 134 **Information sources and search strategy**

135 A search of articles from 2000 onward was done by two experienced librarians at Karolinska  
136 Institutet in the following electronic databases: MEDLINE, Web of Science, Global Health, and  
137 PsycInfo Embase. See Appendix I for the comprehensive search strategy.

### 138 **Eligibility criteria**

139 **Population:** Refugees as defined as per the 1951 Refugee Convention<sup>3</sup>

140 **Intervention:** A programme, approach or technical innovation that aims to protect refugees' right  
141 to health, including interventions aimed at addressing the social determinants of health.  
142 Interventions outside of the health sector that affect health were included.

143 **Comparators:** This component was not necessary as the focus was on gauging the state of  
144 evidence.

145 **Outcomes:** Eligible studies and papers include those discussing plans for action, strategies,  
146 barriers, facilitators or outcomes using an intersectoral approach.



1  
2  
3 147 **Exclusion criteria:** Papers published in language other than English were excluded. Other  
4  
5 148 categories of migrants were not included as their legal entitlements are different to those of  
6  
7 149 refugees which are protected under international law. If the studies did not display some level of  
8  
9 150 integration nor intersectorality, they were not assessed further.<sup>20</sup> Studies or commentaries that  
10  
11 151 solely discuss theories and conceptual models were excluded. Implementation research and  
12  
13 152 operations research studies were eligible as well as studies or reports outlining stakeholder  
14  
15 153 experiences and plans.

16  
17  
18  
19 154 **Time period:** Only studies from 2000 onward have been included, making the study period range  
20  
21 155 over 17 years.

22  
23  
24 156 **Setting:** Eligible studies are set in countries receiving refugees and asylum seekers (who may  
25  
26 157 eventually qualify for refugee status) and serving as hosts for resettlement.

### 27 28 29 158 **Frameworks to address research questions**

30  
31 159 Two published frameworks were used in our analysis the first to understand integration of health  
32  
33 160 services within health systems and the second to analyze intersectoral approaches to support  
34  
35 161 these services. The first is a framework by Atun et al (2010)<sup>21</sup> for analyzing integration of  
36  
37 162 targeted health interventions in health systems, where integration is defined as “the extent,  
38  
39 163 pattern, and rate of adoption and eventual assimilation of health interventions into each of the  
40  
41 164 critical functions of a health system”.<sup>21</sup> Elements in this framework include (i) governance, (ii)  
42  
43 165 financing, (iii) planning, (iv) service delivery, (v) monitoring and evaluation (M&E), and (vi)  
44  
45 166 demand generation.<sup>21</sup> The framework for integration was also used to assess the process, and  
46  
47 167 actors involved in integration.<sup>20</sup>

48  
49  
50  
51  
52 168 The second framework applied is that of the Health in All Policies (HiAP) framework for  
53  
54 169 country action. HiAP is defined as a way for countries to protect population health through “an

1  
2  
3 170 approach to public policies across sectors that systematically takes into account the health  
4  
5 171 implications of decisions, seeks synergies, and avoids harmful health impacts in order to improve  
6  
7 172 population health and health equity".<sup>22</sup> The HiAP framework for action involves six components  
8  
9  
10 173 including: i) establish the need and priorities for HiAP, ii) frame planned action, iii) identify  
11  
12 174 supportive structures and policies, iv) facilitate assessment and engagement, v) ensure  
13  
14 175 monitoring and evaluation, and vi) build capacity.<sup>22</sup> These six components, adapted to refugee  
15  
16 176 needs, were used in the review to frame barriers and facilitators in integrating refugee services  
17  
18 177 through intersectoral collaboration.

### 178 **Data Abstraction**

179 A data abstraction chart was developed based on two frameworks. The chart was tested by two  
180 researchers and revised as appropriate. The revised chart was used by two reserachers to abstract  
181 descriptive and qualitative data as relevant to elements of the two frameworks used. Abstracted  
182 data was used to draw conclusions based on thematic analysis and repeating trends in qualitative  
183 results.

### 184 **RESULTS**

185 Of the 6,117 records identified through the search strategy, 1302 were screened after removing  
186 duplicates, 1141 were excluded based on selection criteria, 131 full texts were assessed, with  
187 references of 15 selected articles screened for inclusion criteria a total 18 studies were included  
188 in our review (see figure 1). Five studies were programmes or interventions carried out in the  
189 United States of America (USA), one in Australia, two in Canada, one in Ethiopia and Uganda,  
190 and one in each of Italy, Lebanon, Mexico, the Netherlands, New Zealand, Spain and the United  
191 Kingdom (UK) (See table 1). Six were interventions at the district/local level, four at a broader  
192 regional level and five at the national level. The interventions outlined in the included studies

1  
2  
3 193 addressed mostly all genders and all age ranges with the exception of six that targeted vulnerable  
4  
5 194 groups: two study on mothers and children;<sup>23,24</sup> one on the elderly;<sup>25</sup> one on students;<sup>26</sup> and two  
6  
7 195 on women and girls.<sup>27,28</sup> Interventions targeting women and children in particular used  
8  
9 196 alternative models of care such as mobile health clinics,<sup>27,28</sup> and school-based interventions.<sup>23,26</sup>  
10  
11 197 Seven studies applied qualitative approaches (primarily in-depth interviews) for evaluation,<sup>26–32</sup>  
12  
13 198 four studies used survey tools or standardized assessment tools;<sup>24,25,33,34</sup> four studies used  
14  
15 199 descriptive and routine data;<sup>23,35–37</sup> and three studies were mainly descriptive analysis reporting  
16  
17 200 on and looking at the outcomes of case examples and policies.<sup>38–40</sup>  
18  
19  
20  
21

22 201 Each of the interventions and summarized barriers and facilitators are described in Table  
23  
24 202 2. In terms of stakeholders involved, studies did not always report on the parties involved in  
25  
26 203 governance, financing, planning, service delivery, monitoring and evaluation or demand  
27  
28 204 generation (elements drawn from the integration framework by Atun et al (2010)<sup>21</sup>). Where they  
29  
30 205 were mentioned, stakeholders responsible for governance of interventions addressing refugee  
31  
32 206 health included primary care centres,<sup>34,36</sup> municipal government,<sup>29,37</sup> departments of social  
33  
34 207 services and/or public health,<sup>29,35</sup> central services responsible for coordination of refugee services  
35  
36 208 and provision of assistance to local services,<sup>33,34</sup> national governments,<sup>30,31</sup> and international  
37  
38 209 bodies.<sup>27</sup> Stakeholders responsible for health financing included individual fundraising by  
39  
40 210 service providers,<sup>30,32</sup> government,<sup>29,30,34,37,40</sup> and international bodies or donors.<sup>27,35,36,40</sup>  
41  
42 211 Programme and policy planning stakeholders included national government,<sup>30,37,40</sup> departments  
43  
44 212 of social services and/or public health,<sup>26,29,35</sup> central services responsible for coordination of  
45  
46 213 refugee services and provision of assistance to local services,<sup>28,33,34</sup> researchers,<sup>23,25,29,35,36</sup> service  
47  
48 214 providers,<sup>26,27,34,36</sup> and international bodies or donors.<sup>27,35,40</sup> Service delivery stakeholders  
49  
50 215 included government departments of social services and/or public health,<sup>26,29,32,35,37–40</sup> networks  
51  
52  
53  
54  
55  
56  
57  
58  
59  
60

1  
2  
3 216 of local service providers in health, education, socialization, translation and/or  
4  
5 217 employment,<sup>23,30,33,35</sup> healthcare providers,<sup>26,32,34,36,37</sup> central services responsible for  
6  
7 218 coordination of refugee services and provision of assistance to local services,<sup>31,33,34</sup> community  
8  
9 219 health workers,<sup>25</sup> and international bodies.<sup>27,40</sup> Stakeholders responsible for monitoring and  
10  
11 220 evaluation were seldom explicitly mentioned. For demand generation, stakeholders included  
12  
13 221 central services responsible for coordination of refugee services and provision of assistance to  
14  
15 222 local services,<sup>34</sup> local media in the language of the target population,<sup>35</sup> community leaders and/or  
16  
17 223 community health workers,<sup>25,27,30,31</sup> home health outreach services,<sup>27,30</sup> and healthcare  
18  
19 224 providers.<sup>32,36</sup>

20  
21  
22  
23  
24 225       Enabling strategies to address refugee health identified in this review include establishing  
25  
26 226 networks of service delivery through a combination of existing public and private services,  
27  
28 227 establishing a system navigator role, engaging host communities to reduce stigma, ensuring  
29  
30 228 availability of translation services, outreach, advocacy and legislative support, and appropriate  
31  
32 229 funding models. Table 3 highlights the studies that address each of these strategies. In Italy for  
33  
34 230 example, networks were promoted among private and public authorities and service providers,  
35  
36 231 including health, employment, vocational training and continuing education services.<sup>33</sup> In this  
37  
38 232 model, users move through the pathways of integration and can receive support for any  
39  
40 233 combination of health needs, access to education, housing support, and legal assistance.<sup>33</sup>  
41  
42 234 Collaborative design and delivery of services was also demonstrated in Australia with support  
43  
44 235 from multidisciplinary, intersectoral teams, but a lack of funding presented barriers to success for  
45  
46 236 this initiative.<sup>26</sup> Similarly in the USA, the “Bridge Project” faced funding barriers for  
47  
48 237 coordination of care despite seeing promising results from use of a system navigator – or primary  
49  
50 238 care nurse “bridge” – to coordinate primary care and mental health care services.<sup>36</sup> A network of  
51  
52  
53  
54  
55  
56  
57  
58  
59  
60

1  
2  
3 239 “gateway services” was also tested in Canada using a “Reception House” model.<sup>34</sup> These  
4  
5 240 services are characterized by being person-centred, interprofessional, communication-focused,  
6  
7 241 and comprehensive across the continuum of care.<sup>34</sup> Relationship-management between  
8  
9 242 Reception House and health professionals, translation services, and social services is a key  
10  
11 243 component for success.<sup>34</sup> Input from international medical graduates in training also supports this  
12  
13 244 work by enhancing culturally appropriate service delivery by this network of partners.<sup>34</sup> Striking  
14  
15 245 a balance between providing tailored, culturally-appropriate care and integrating health and  
16  
17 246 social services for refugees into existing services in the host community can be especially  
18  
19 247 challenging. Policy reviews suggest that taking a “one-policy, one-level, one-outcome” approach  
20  
21 248 or focusing refugee management under one ministry is not sufficient in addressing the wide  
22  
23 249 range of challenges that both host and refugee communities are facing as a result of the current  
24  
25 250 political climate.<sup>39,40</sup> The Ethiopian government for example reorganized ministries to  
26  
27 251 incorporate refugee management into existing portfolios rather than one refugee-specific one,  
28  
29 252 moving refugee assistance programs out of camps and promoting more collaboration across  
30  
31 253 government and non-governmental programs.<sup>40</sup>

32  
33 254 Facilitators identified in implementing these strategies include strong communication of  
34  
35 255 program availability, tools and training for providers, colocation of services, transportation  
36  
37 256 services to enhance access, clear role definitions, interprofessional team and relationship  
38  
39 257 management across providers, innovation in budget and financing, and coordinated refugee-  
40  
41 258 specific policies.

42  
43 259 Barriers articulated include lack of a participatory approach, poor communication leading  
44  
45 260 to stigma and underuse of services, insufficient resources given to providers, absence of  
46  
47 261 financing model, unclear roles and insufficient coordination of interprofessional teams,  
48  
49  
50  
51  
52  
53  
54  
55  
56  
57  
58  
59  
60

1  
2  
3 262 exclusionary refugee policies, low availability and use of data, and turf wars across governance  
4  
5 263 stakeholders. Table 4 highlights the studies that expand on these themes as barriers or  
6  
7  
8 264 facilitators.

## 9 10 265 **DISCUSSION**

11  
12 266 The findings from the existing but scarce literature highlight that important factors in facilitating  
13  
14 267 intersectoral collaboration and the successful integration of refugee services within existing  
15  
16 268 health systems include: the coordination of existing public and private services, appropriate  
17  
18  
19 269 funding models, a systems navigator role, referral systems and colocation of services, advocacy  
20  
21 270 and legislative support and alternate models of care for vulnerable women and children. These  
22  
23  
24 271 are discussed further below.

### 25 26 272 **Coordination of Existing Public and Private Services**

27  
28 273 A networked approach to service delivery during the initial reception of refugees can often  
29  
30 274 mitigate some of the challenges faced by refugee communities. Some examples of coordination  
31  
32  
33 275 of services were seen in Italy,<sup>33</sup> Australia,<sup>26</sup> the US,<sup>36</sup> and Canada.<sup>34</sup> In Canada where a network  
34  
35 276 of “gateway services” was tested using the “Reception House” model it successfully provided  
36  
37  
38 277 responsive and culturally sensitive primary care.<sup>34</sup> By partnering community and translation  
39  
40 278 services, as well as health care providers with the Reception House, it decreased wait times and  
41  
42 279 improved health care access through referrals and coordination of services.<sup>34</sup>

### 43 44 280 **Appropriate Funding Models for Integrated Services**

45  
46  
47 281 This was not explicitly studied in the literature, however international bodies dealing with  
48  
49 282 refugee care have previously been reluctant to invest their efforts in what is perceived as  
50  
51 283 “unstable environments” created with integration.<sup>40</sup> Furthermore, a lack of data on the specific  
52  
53  
54 284 needs of refugee subgroups (such as women and children) once the delivery of care is integrated

1  
2  
3 285 may mean that they are not sufficiently prioritized in local strategic health goals.<sup>30</sup> Where needs  
4  
5 286 and special services are not prioritized, financing is not provided for more innovative structures  
6  
7 287 within existing primary care or social systems which threaten their sustainability. It is therefore  
8  
9  
10 288 necessary for planners, implementers and evaluators of integrated health and social services to  
11  
12 289 understand the different needs of their host and refugee community users clearly and to ensure  
13  
14 290 that an investment case is made for the bolstered services such as system navigation, translation,  
15  
16  
17 291 provider training, outreach or colocation.<sup>36</sup>  
18

### 19 292 **System Navigator Role**

20  
21 293 Integration works through establishing relationships across networks of local stakeholders and  
22  
23 294 service providers. To coordinate this effectively, a system navigator role can be established – the  
24  
25 295 evidence suggests that this role is most effective in the early stage of resettlement.<sup>34</sup> The system  
26  
27 296 navigation role can be played by an organization or by people within the existing health or social  
28  
29 297 systems. It connects incoming refugees to timely, culturally-appropriate care in the community  
30  
31 298 without creating parallel structures that either threaten host communities or further stigmatize  
32  
33 299 refugees.<sup>29,34</sup> This is further strengthened when providers have access to the knowledge, tools  
34  
35 300 and training needed to address the specific needs of refugees, including the more vulnerable  
36  
37 301 (e.g., the elderly, women, and children). Providers should understand the context in which they  
38  
39 302 work and the available features and services, user needs, and legislation as it relates to  
40  
41 303 refugees.<sup>33</sup> Those playing a coordination or system navigation role should also be able to build  
42  
43 304 strong networks with allied specialists, identify appropriate resources and reach out to users.<sup>33,34</sup>  
44  
45 305 The challenge here however is that integrating refugee care may eliminate some determination  
46  
47 306 procedures, potentially undermining the protection mandate and underestimate the tailored needs  
48  
49 307 of refugees dealing with significant trauma.<sup>40</sup>  
50  
51  
52  
53  
54  
55  
56  
57  
58  
59  
60

### 308 **Advocacy and Legislative Support**

309 Exclusionary immigration policies can play a significant role in marginalization and  
310 discrimination against refugee communities leading to low health seeking behaviors and use of  
311 available integrated or intersectoral services.<sup>39</sup> Effective advocacy needs to target the policy-  
312 making levels in order to counteract the negative impacts of exclusionary policies. Advocacy by  
313 health care providers can be effective at the institutional level to push for better allocation of  
314 services and funding.<sup>30</sup> A multipronged approach may be necessary to continue to advocate for  
315 the right to health for refugees by addressing legal challenges, establishing timely and accurate  
316 data and information systems to capture needs, creating health promoting environments,  
317 investing in person-centred, culturally-appropriate and easily accessible services, and evaluating  
318 coordination and service delivery efforts. Engaging policy makers in knowledge translation and  
319 evidence-informed decision-making is one way to effectively advocate and provide legislative  
320 support in refugee health. In Lebanon for example, where there are huge challenges in meeting  
321 the health needs of a large Syrian refugee population, researchers engaged policy-makers in  
322 knowledge production (i.e research priority-setting), translation and uptake activities.<sup>41</sup> This  
323 ultimately led to the hiring of a refugee health coordinator by the Lebanese Ministry of Public  
324 Health. The refugee health coordinator role was created to support intersectoral collaboration,  
325 assisting in strategic planning and implementation of action plans to respond to the health needs  
326 of Syrian refugees including helping with the development of refugee health information systems  
327 at the Ministry of Public Health.<sup>41</sup> The UCL-Lancet Commission on Migration and Health  
328 supports knowledge translation by bringing together academics, policymakers, and health system  
329 experts to take an inter-disciplinary approach to reviewing evidence, develop policy



330 recommendations and disseminate these findings globally amongst policymakers and  
331 institutions.<sup>42</sup>

### 332 **Alternative Models of Care to Reach Vulnerable Women and Children**

333 Looking at the studies that reported targeted interventions for women and children, alternative  
334 models of care were used. This included mobile health clinics, and programs linked to schools to  
335 support screening and active case finding. These services reported to reduce barriers to access of  
336 essential health services, increase detection of health conditions, and improve coordination of  
337 care, and reduced feelings of social isolation.<sup>26,27</sup> This suggests that flexible service delivery and  
338 innovation in mode of delivery may need to be considered when attempting to reach at risk  
339 refugee groups.

### 340 **Limitations and Future Directions**

341 The main purpose of our reviews was to gather available data and point to further research  
342 questions that can be derived from our results. Our review was limited by the scarcity of research  
343 in this area. Due to the paucity of evidence on evaluation of practical intersectoral interventions,  
344 all relevant studies were included; therefore, quality and rigor may vary. Some key programmes  
345 and approaches may be missing due to interventions occurring at individual level instead of at  
346 the systems level as well as not having been published in academic literature. Individual health  
347 providers or organizations will navigate barriers in health systems through tacit and experiential  
348 knowledge that is often not documented. Data will be further amplified by conducting key  
349 informant interviews in selected countries.

350 As others have noted, the literature on intersectoral collaboration disproportionately  
351 focuses on high-income countries.<sup>43</sup> It is therefore no surprise that the evidence for this review  
352 largely came from high-income countries with only two studies conducted in upper-middle

1  
2  
3 353 income and two in low-income countries. This may affect the generalizability of the findings  
4  
5 354 reported here as low-income and middle-income countries have greater coordination challenges  
6  
7  
8 355 to overcome due to fragmented systems and weak governance.<sup>44</sup> Additionally, according to the  
9  
10 356 latest report on the UN Refugee Agency, approximately 85% of refugees are hosted in  
11  
12 357 developing nations.<sup>45</sup> More evidence and special consideration is needed in these contexts with  
13  
14  
15 358 respect to refugee health particularly for those most at risk such as women, children and the  
16  
17 359 elderly.

18  
19 360 Although there exists reaffirmed enthusiasm in intersectoral approaches to achieving  
20  
21 361 global health agendas such as the SDGs, it has been found that the lack of quality evidence  
22  
23 362 represents a key barrier to evidence-informed decision-making for the development of cross-  
24  
25 363 cutting policies and governance required for sustained intersectoral collaboration.<sup>43</sup> Most of what  
26  
27 364 has been written have not been grounded in relevant theories or frameworks.<sup>44</sup> This pattern of a  
28  
29 365 dearth of evidence was seen in our review, while the challenges in meeting the health needs of  
30  
31 366 refugees are well documented, paradoxically we found little research on effective intersectoral  
32  
33 367 and integrated approaches in meeting these needs. Our use of the combined frameworks is a step  
34  
35 368 forward in addressing the gap in this essential evidence base. Current gaps in knowledge  
36  
37 369 represents an untapped potential for improvements to financial and human resource efficiency in  
38  
39 370 health systems. Generating high quality data in health systems and policy research for migrant  
40  
41 371 health and on intersectoral approaches to health has been identified as a research priority.<sup>43,46</sup>  
42  
43 372 Given the limited evidence we found in our scoping review the momentum for continued  
44  
45 373 research should be sustained.

46  
47  
48  
49  
50  
51 374

52  
53  
54 375

1  
2  
3 376 **CONCLUSION**  
4

5 377 Refugees face individual, institutional, and system level barriers in access to health care and to  
6  
7 378 provide adequate health services to this vulnerable population, gathering more evidence on  
8  
9  
10 379 effective integrated and intersectoral approaches is a priority. This scoping review has  
11  
12 380 highlighted an important gap in the evidence on integration of services and intersectoral  
13  
14 381 approaches in serving vulnerable refugee populations.  
15

16  
17 382 From the available evidence, the following are key policy insights and enablers towards  
18  
19 383 greater integration of services and/or inter-sectoral collaboration:  
20

- 21 384 1) Improving coordination between existing programmes through financing stronger data  
22  
23 385 and referral systems, supporting colocation of services, and formalizing system navigator  
24  
25 386 positions to manage coordination activities  
26  
27  
28 387 2) Incentivizing health and social service authorities to establish formal system navigator  
29  
30 388 roles that connect all relevant services – provision of information technology tools can  
31  
32 389 help support this function and better manage the network of available programmes  
33  
34  
35 390 3) Engaging host communities to enhance understanding, to reduce stigma, and to create an  
36  
37 391 enabling environment for policies that protect refugees and their rights to social  
38  
39 392 determinants of health  
40  
41  
42 393 4) Communicating the availability of programmes and services through cultural mediators  
43  
44 394 and establishing formal translation and transport services to improve access  
45  
46  
47 395 5) Establishing training and resources for providers to a) better understand the needs of  
48  
49 396 refugee communities, b) be aware of available and relevant services for referral across  
50  
51 397 sectors, and c) more efficiently manage cases.  
52  
53  
54  
55  
56  
57  
58  
59  
60

1  
2  
3 398 These recommendations are based on consistent facilitators and barriers identified across studies  
4  
5 399 included in this review. They form critical starting points in leveraging integrated services and/or  
6  
7  
8 400 intersectoral approaches to better serve refugees while promoting efficiency in health systems.  
9

#### 10 401 **ETHICS APPROVAL**

11  
12 402 Ethics approval was not required for this scoping review as human subjects are not involved.  
13  
14

#### 15 403 **AUTHOR'S CONTRIBUTIONS**

16  
17  
18 404 GT together with librarians at Karolinska Institutet identified databases and planned the literature  
19  
20 405 search. SH & DJ drafted the paper and incorporated co-author feedback, SH & DJ abstracted data  
21  
22 406 from peer-reviewed literature. SC, EVL, GT and PF provided critical feedback and comments on  
23  
24 407 the manuscript. SC and SH acted as secondary reviewers.  
25  
26

27 408

#### 28 29 409 **ACKNOWLEDGMENTS**

30  
31  
32 410 The authors would like to thank Karolinska Institutet librarians, Magdalena Svanberg and Gun  
33  
34 411 Brit Knutssön, for their contributions, specifically in running the search and identifying  
35  
36 412 appropriate databases. We are also grateful to WHO Euro for their discussions and suggestions  
37  
38 413 in the early stages of this project.  
39  
40

#### 41 414 **COMPETING INTERESTS**

42  
43 415 None.  
44

#### 45 416 **FUNDING STATEMENT**

46  
47  
48 417 No funding was obtained for this project. In-kind time contributions from staff at the Alliance for  
49  
50 418 Health Policy and Systems Research and SIGHT have made this possible.  
51  
52

53  
54 419  
55  
56  
57  
58  
59  
60

420 **REFERENCES**

- 421
- 422 1 OHCHR. The Right to Health. Geneva, Switzerland, 2008.
- 423 2 Tangcharoensathien V, Mills A, Palu T. Accelerating health equity: the key role of  
424 universal health coverage in the Sustainable Development Goals. *BMC Med* 2015; **13**:  
425 101.
- 426 3 UNHCR. Convention and Protocol relating to the status of refugees. Geneva, Switzerland,  
427 2010.
- 428 4 UNHCR. UNHCR viewpoint: ‘Refugee’ or ‘migrant’ – Which is right? Geneva,  
429 Switzerland, 2016.
- 430 5 Rechel B, Mladovsky P, Ingleby D, Mackenbach JP, McKee M. Migration and health in  
431 an increasingly diverse Europe. *Lancet* 2013; **381**: 1235–45.
- 432 6 Council for the EU. Council Directive 2003/9/EC of 27 January 2003 Laying Down  
433 Minimum Standards for the Reception of Asylum Seekers in Member States. *Off J Eur*  
434 *Union* 2003 2003; : L 31/18.
- 435 7 OHCHR. General Recommendation 30. Discrimination against non-citizens. Geneva,  
436 Switzerland, 2004.
- 437 8 Jackson-Bowers, Eleanor, Cheng I-H. Meeting the primary health care needs of refugees  
438 and asylum seekers. *Res Roundup* 2010.
- 439 9 WHO. Advancing the right to health: the vital role of law. Geneva, Switzerland, 2017.
- 440 10 Joshi C, Russell G, Cheng I-H, *et al*. A narrative synthesis of the impact of primary health  
441 care delivery models for refugees in resettlement countries on access, quality and  
442 coordination. *Int J Equity Health* 2013; **12**: 88.
- 443 11 Citizenship AGD of I and. Fact sheet 60 - Australia’s refugee and humanitarian program.  
444 2012.
- 445 12 UN. Integrated Approaches to Sustainable Development Planning and Implementation.  
446 New York, USA, 2015.
- 447 13 Kett ME. Internally Displaced Peoples in Bosnia-Herzegovina: Impacts of Long-term  
448 Displacement on Health and Well-being. *Med Confl Surviv* 2005; **21**: 199–215.
- 449 14 Patel N, Kellezi B, Williams AC de C. Psychological, social and welfare interventions for  
450 psychological health and well-being of torture survivors. *Cochrane Database Syst Rev*  
451 2014; published online Nov 11. DOI:10.1002/14651858.CD009317.pub2.
- 452 15 Arksey H, O’Malley L. Scoping studies: towards a methodological framework. *Int J Soc*

- 1  
2  
3 453 *Res Methodol* 2005; **8**: 19–32.
- 4  
5 454 16 Tricco AC, Lillie E, Zarin W, *et al.* A scoping review on the conduct and reporting of  
6 455 scoping reviews. *BMC Med Res Methodol* 2016; **16**: 15.
- 7  
8 456 17 Peters MDJ, Godfrey CM, Khalil H, McInerney P, Parker D, Baldini Soares C. The  
9 457 Joanna Briggs Institute Reviewers' Manual: Methodology for JBI Scoping Review.  
10 458 Adelaide, Australia, 2015.
- 11  
12  
13 459 18 Center for Open Science. Open Science Framework. <https://osf.io/>.
- 14  
15 460 19 Javadi D, Langlois E V., Ho S, Friberg P, Tomson G. Intersectoral approaches and  
16 461 integrated services in achieving the right to health for refugees upon resettlement: a  
17 462 scoping review protocol. *BMJ Open* 2017; **7**. DOI:10.1136/bmjopen-2017-016638.
- 18  
19  
20 463 20 Walt G, Shiffman J, Schneider H, Murray SF, Brugha R, Gilson L. 'Doing' health policy  
21 464 analysis: methodological and conceptual reflections and challenges. *Health Policy Plan*  
22 465 2008; **23**: 308–17.
- 23  
24 466 21 Atun R, de Jongh T, Secci F, Ohiri K, Adeyi O. Integration of targeted health  
25 467 interventions into health systems: a conceptual framework for analysis. *Health Policy*  
26 468 *Plan* 2010; **25**: 104–11.
- 27  
28  
29 469 22 WHO. Health in All Policies: Framework for Country Action. Geneva, Switzerland, 2014.
- 30  
31 470 23 McNaughton DB, Hindin P, Guerrero Y. Directions for Refining a School Nursing  
32 471 Intervention for Mexican Immigrant Families. *J Sch Nurs* 2010; **26**: 430–5.
- 33  
34 472 24 Cowell JM, McNaughton D, Ailey S, Gross D, Fogg L. Clinical Trial Outcomes of the  
35 473 Mexican American Problem Solving Program (MAPS). *Hisp Heal Care Int* 2009; **7**: 178–  
36 474 89.
- 37  
38  
39 475 25 Verhagen I, Ros WJ, Steunenberg B, de Wit NJ. Culturally sensitive care for elderly  
40 476 immigrants through ethnic community health workers: design and development of a  
41 477 community based intervention programme in the Netherlands. *BMC Public Health* 2013;  
42 478 **13**: 227.
- 43  
44  
45 479 26 Woodland L, Kang M, Elliot C, Perry A, Eagar S, Zwi K. Evaluation of a school  
46 480 screening programme for young people from refugee backgrounds. *J Paediatr Child*  
47 481 *Health* 2016; **52**: 72–9.
- 48  
49  
50 482 27 Lilleston P, Winograd L, Ahmed S, *et al.* Evaluation of a mobile approach to gender-  
51 483 based violence service delivery among Syrian refugees in Lebanon. *Health Policy Plan*  
52 484 2018; published online June 13. DOI:10.1093/heapol/czy050.
- 53  
54  
55 485 28 Guruge S, Hunter J, Barker K, McNally MJ, Magalhães L. Immigrant women's

- 1  
2  
3 486 experiences of receiving care in a mobile health clinic. *J Adv Nurs* 2010; **66**: 350–9.  
4  
5 487 29 Calvo R, Rojas V, Waters MC. The Effect of Universal Service Delivery on the  
6 488 Integration of Moroccan Immigrants in Spain: A Case Study from an Anti-Opressive  
7 489 Perspective. *Br J Soc Work* 2014; **44**: i123–39.  
8  
9  
10 490 30 Mortensen A. Public health system responsiveness to refugee groups in New Zealand:  
11 491 activation from the bottom up. *Soc Policy J New Zeal* 2011.  
12  
13 492 31 Stewart M, Anderson J, Beiser M, *et al*. Multicultural Meanings of Social Support among  
14 493 Immigrants and Refugees. *Int Migr* 2008; **46**: 123–59.  
15  
16 494 32 MacFarlane A, Singleton C, Green E. Language barriers in health and social care  
17 495 consultations in the community: A comparative study of responses in Ireland and England.  
18 496 *Health Policy (New York)* 2009; **92**: 203–10.  
19  
20  
21 497 33 Catarci M. Conceptions and Strategies for User Integration across Refugee Services in  
22 498 Italy. *J Educ Cult Psychol Stud* 2012.  
23  
24 499 34 McMurray J, Breward K, Breward M, Alder R, Arya N. Integrated Primary Care Improves  
25 500 Access to Healthcare for Newly Arrived Refugees in Canada. *J Immigr Minor Heal* 2014;  
26 501 **16**: 576–85.  
27  
28  
29 502 35 Kim MJ, Cho H-I, Cheon-Klessig YS, Gerace LM, Camilleri DD. Primary health care for  
30 503 Korean immigrants: sustaining a culturally sensitive model. *Public Health Nurs* 2002; **19**:  
31 504 191–200.  
32  
33  
34 505 36 Yeung A, Kung WW, Chung H, *et al*. Integrating psychiatry and primary care improves  
35 506 acceptability to mental health services among Chinese Americans. *Gen Hosp Psychiatry*  
36 507 2004; **26**: 256–60.  
37  
38  
39 508 37 Geltman PL, Cochran J. A Private-Sector Preferred Provider Network Model for Public  
40 509 Health Screening of Newly Resettled Refugees. *Am J Public Health* 2005; **95**: 196–9.  
41  
42 510 38 Woodland L, Burgner D, Paxton G, Zwi K. Health service delivery for newly arrived  
43 511 refugee children: A framework for good practice. *J Paediatr Child Health* 2010; **46**: 560–  
44 512 7.  
45  
46  
47 513 39 Philbin MM, Flake M, Hatzenbuehler ML, Hirsch JS. State-level immigration and  
48 514 immigrant-focused policies as drivers of Latino health disparities in the United States. *Soc*  
49 515 *Sci Med* 2018; **199**: 29–38.  
50  
51 516 40 Tuepker A, Chi C. Evaluating integrated healthcare for refugees and hosts in an African  
52 517 context. *Heal Econ Policy Law* 2009; **4**: 159.  
53  
54  
55 518 41 Langlois E V., Daniels K, Akl EA. Evidence synthesis for health policy and systems: a  
56  
57  
58  
59  
60

- 1  
2  
3 519 methods guide. Geneva, Switzerland, 2018.  
4  
5 520 42 The UCL-Lancet Commission on Migration and Health. UCL-Lancet Commission on  
6 521 Migration and Health. 2018.  
7  
8 522 43 Glandon D, Meghani A, Jessani N, Qiu M, Bennett S. Identifying health policy and  
9 523 systems research priorities on multisectoral collaboration for health in low-income and  
10 524 middle-income countries. *BMJ Glob Heal* 2018; **3**: e000970.  
11  
12  
13 525 44 Bennett S, Glandon D, Rasanathan K. Governing multisectoral action for health in low-  
14 526 income and middle-income countries: unpacking the problem and rising to the challenge.  
15 527 *BMJ Glob Heal* 2018; **3**: e000880.  
16  
17  
18 528 45 UNHCR. Global Trends Forced Displacement in 2017. Geneva, Switzerland, 2018  
19 529 <https://www.unhcr.org/5b27be547.pdf>.  
20  
21 530 46 Abubakar I, Aldridge RW, Devakumar D, *et al*. The UCL–Lancet Commission on  
22 531 Migration and Health: the health of a world on the move. *Lancet* 2018; **392**: 2606–54.  
23  
24 532  
25  
26  
27  
28 533  
29  
30  
31 534  
32  
33  
34 535  
35  
36  
37  
38 536  
39  
40  
41 537  
42  
43  
44 538  
45  
46  
47  
48 539  
49  
50  
51 540  
52  
53  
54 541  
55  
56  
57  
58  
59  
60



542 **APPENDIX I**543 **1. Medline (Ovid)**

Date of Search: 2016-11-03

Number of hits: 2019

Comments:

Field labels:

.tw,kf. = title, abstract, keyword

exp/ = MeSH, exploded

/ = MeSH, not exploded

adj3 = within two words

1. Refugees/

2. exp "Emigrants and Immigrants"/

3. "Emigration and Immigration"/

4. "Transients and Migrants"/

5. (refugee\* or immigra\* or migrat\* or migrant\* or asylum\* or transient\*).tw,kf.

6. or/1-5

7. Delivery of Health Care/

8. Health Services Accessibility/

9. Patient Acceptance of Health Care/

10. "Health Services Needs and Demand"/

11. Quality of Health Care/

12. Interinstitutional Relations/

13. Interdepartmental Relations/

14. Public-Private Sector Partnerships/

15. ((health care or healthcare or health service\*) adj3 (access\* or availab\* or barrier\* or deliver\* or need\* or provision\* or seeking or quality or utilization)).tw,kf.

16. ((multisector\* or multi-sector\* or intersector\* or inter-sector\* or crosssector\* or cross-sector\* or interdisciplinary or inter-disciplinary or multidisciplinary or multi-disciplinary or interinstitution\* or inter-institution\* or interdepartment\* or inter-department\*) adj3 (analysis or collaborat\* or cooperat\* or co-operat\* or approach\* or partnership\* or relation\*)).tw,kf.

17. or/7-16

18. Healthcare Disparities/

19. Social Determinants of Health/

20. Health Status Disparities/

21. Health Equity/

22. exp Human Rights/

23. ((health or health care or healthcare or health service\*) adj3 (situation or difference\*)).tw,kf.

24. (disparit\* or equity or equities or inequity or inequities or equalit\* or inequalit\* or right\* or injustice\* or discrimination\* or determinant\* or disadvantage\* or vulnerab\*).tw,kf.

25. or/18-24

26. 6 and 17 and 25

27. Remove duplicates from 26

28. limit 27 to yr="2000 -Current"

544  
545  
546

## 2. Web of Science (Thomson Reuter)

Date of Search: 2016-11-03  
Number of hits: 1.166  
Comments:

Field labels:  
TOPIC = title, abstract, keywords  
NEAR/3 = within 3 words

#1 TOPIC: (refugee\* or immigra\* or migrat\* or migrant\* or asylum\* or transient\*)

#2 TOPIC: (("health care" or healthcare or "health service\*") NEAR/3 (access\* or availab\* or barrier\* or deliver\* or need\* or provision\* or seeking or quality or utilization))

#3 TOPIC: ((multisector\* or multi-sector\* or intersector\* or inter-sector\* or crosssector\* or cross-sector\* or interdisciplinary or inter-disciplinary or multidisciplinary or multi-disciplinary or interinstitution\* or inter-institution\* or interdepartment\* or inter-department\*) NEAR/3 (analysis or collaborat\* or cooperat\* or co-operat\* or approach\* or partnership\* or relation\*))

#4 #3 OR #2

#5 TOPIC: ((health or "health care" or healthcare or "health service\*") NEAR/3 (situation or difference\*))

#6 TOPIC: (disparit\* or equity or equities or inequity or inequities or equalit\* or inequalit\* or "human right\*" or "civil right\*" or "citizen\* right\*" or "social right\*" or injustice\* or discrimination\* or determinant\* or disadvantage\* or vulnerab\*)

#7 #6 OR #5

#8 #7 AND #4 AND #1

#9 Timespan: 2000-2016.

547  
548

549

## 3. Global Health (Ovid)

Date of Search: 2016-11-03  
 Number of hits: 497  
 Comments:

Field labels:  
 .ab,ti. = title, abstract  
 exp/ =thesaurus term, exploded  
 / = thesaurus term, not exploded  
 adj3 = within two words

1. refugees/
2. immigrants/
3. migrants/
4. immigration/
5. (refugee\* or immigra\* or migrat\* or migrant\* or asylum\* or transient\*).ab,ti.
6. or/1-5
7. health care utilization/
8. ((health care or healthcare or health service\*) adj3 (access\* or availab\* or barrier\* or deliver\* or need\* or provision\* or seeking or quality or utilization)).ab,ti.
9. ((multisector\* or multi-sector\* or intersector\* or inter-sector\* or crosssector\* or cross-sector\* or interdisciplinary or inter-disciplinary or multidisciplinary or multi-disciplinary or interinstitution\* or inter-institution\* or interdepartment\* or inter-department\*) adj3 (analysis or collaborat\* or cooperat\* or co-operat\* or approach\* or partnership\* or relation\*)).ti,ab.
10. or/8-9
11. exp disparity/
12. exp discrimination/
13. human rights/
14. ((health or health care or healthcare or health service\*) adj3 (situation or difference\*)).ti,ab.
15. (disparit\* or equity or equities or inequity or inequities or equalit\* or inequalit\* or right\* or injustice\* or discrimination\* or determinant\* or disadvantage\* or vulnerab\*).ti,ab.
16. or/11-15
17. 6 and 10 and 16
18. limit 17 to yr="2000 -Current"

550

551

552

## 4. PsycInfo (OVID)

Date of Search: 2016-11-03  
 Number of hits: 667  
 Comments:

Field labels:  
 .ti,ab,id. = title, abstract, keyword  
 exp/ = subject heading, exploded  
 / = subject heading, not exploded  
 adj3 = within two words

1. exp Human Migration/
2. Immigration/
3. (refugee\* or immigra\* or migrat\* or migrant\* or asylum\* or transient\*).ti,ab,id.
4. or/1-3
  
5. Health Care Delivery/
6. Health Care Utilization/
7. Health Care Seeking Behavior/
8. Health Service Needs/
9. "Quality of Care"/
10. ((health care or healthcare or health service\*) adj3 (access\* or availab\* or barrier\* or deliver\* or need\* or provision\* or seeking or quality or utilization)).ti,ab,id.
11. ((multisector\* or multi-sector\* or intersector\* or inter-sector\* or crosssector\* or cross-sector\* or interdisciplinary or inter-disciplinary or multidisciplinary or multi-disciplinary or interinstitution\* or inter-institution\* or interdepartment\* or inter-department\*) adj3 (analysis or collaborat\* or cooperat\* or co-operat\* or approach\* or partnership\* or relation\*)).ti,ab,id.
12. or/5-11
  
13. Health Disparities/
14. Social Equality/
15. exp Human Rights/
16. ((health or health care or healthcare or health service\*) adj3 (situation or difference\*)).ti,ab,id.
17. (disparit\* or equity or equities or inequity or inequities or equalit\* or inequalit\* human right\* or civil right\* or citizen\* right\* or social right\* or injustice\* or discrimination\* or determinant\* or disadvantage\* or vulnerab\*).ti,ab,id.
18. or/13-17
  
19. 4 and 12 and 18
20. limit 19 to yr="2000 -Current"

553

554

555

556

Figure 1. Review Flowchart

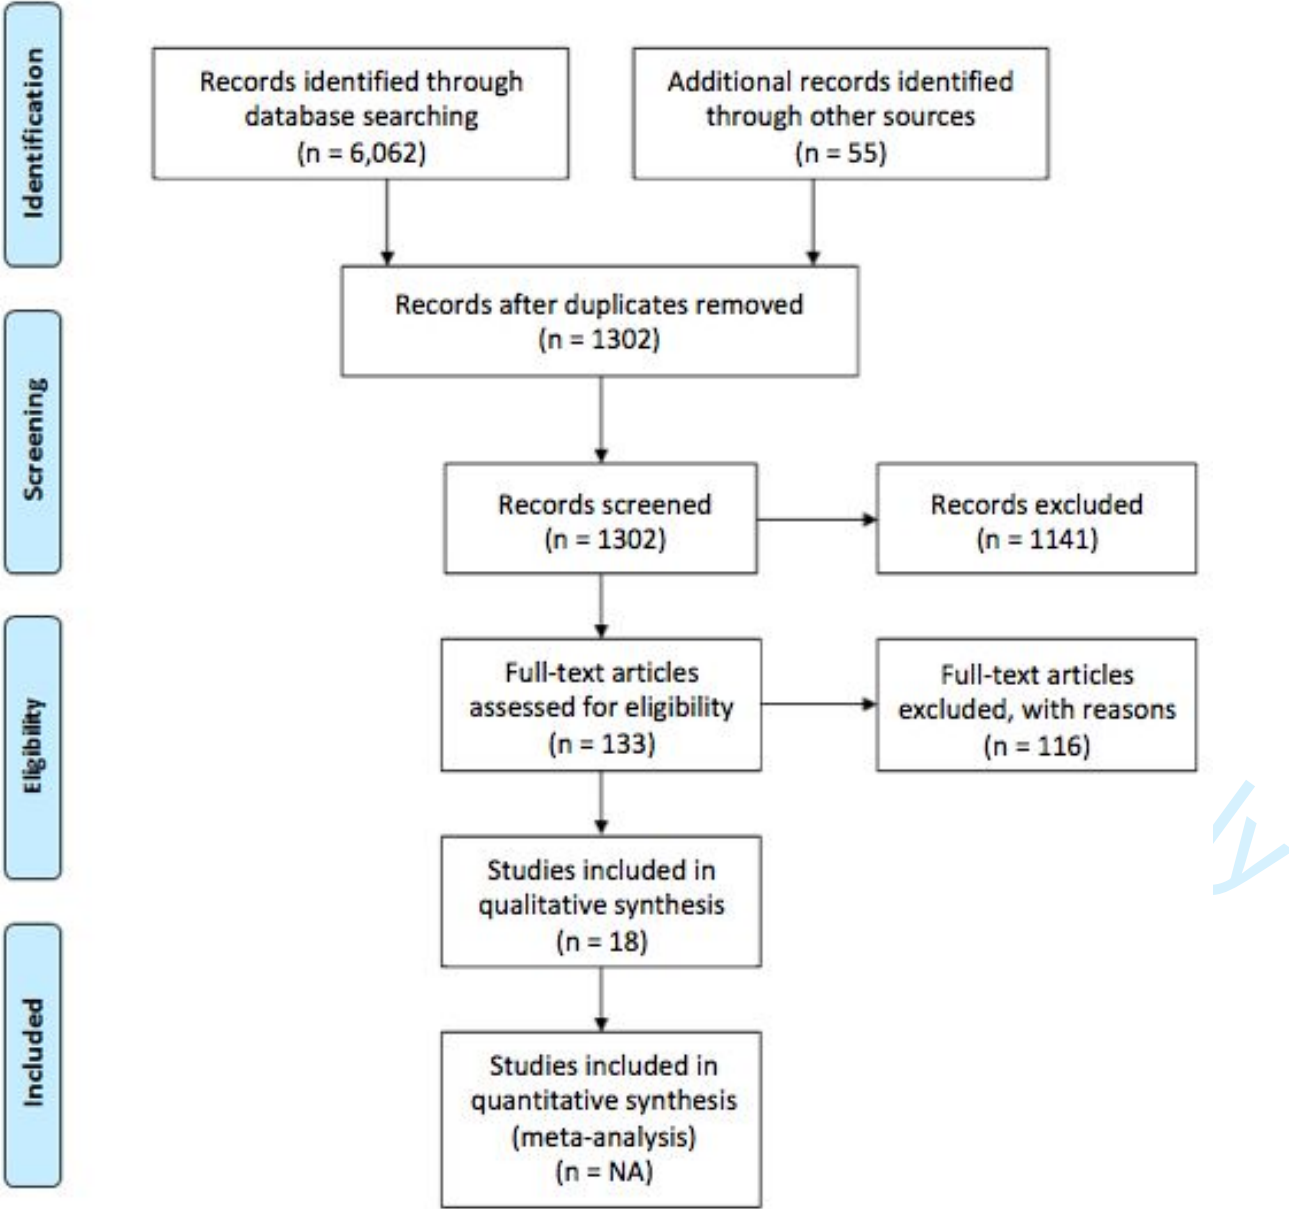

Table 1. Countries represented in Included Studies

| Country           | Count |
|-------------------|-------|
| Australia         | 2     |
| Canada            | 2     |
| Ethiopia & Uganda | 1     |
| Italy             | 1     |
| Lebanon           | 1     |
| Mexico            | 1     |
| Netherlands       | 1     |
| New Zealand       | 1     |
| Spain             | 1     |
| UK                | 1     |
| USA               | 5     |
| Grand Total       | 18    |

Table 2. Summary of included studies

| Author        | Year | Title                                                                                                                                         | Intervention                                                                                                                                                                            | Barriers                                                                                                                                       | Facilitators                                                                                                                                                                                                                                                                                                               | Country |
|---------------|------|-----------------------------------------------------------------------------------------------------------------------------------------------|-----------------------------------------------------------------------------------------------------------------------------------------------------------------------------------------|------------------------------------------------------------------------------------------------------------------------------------------------|----------------------------------------------------------------------------------------------------------------------------------------------------------------------------------------------------------------------------------------------------------------------------------------------------------------------------|---------|
| Calvo et al   | 2014 | The Effect of Universal Service Delivery on the Integration of Moroccan Immigrants in Spain: A Case Study from an Anti-Oppressive Perspective | Addressing stigma & host community perceptions; system navigator (intercultural mediator)                                                                                               | Minimal involvement of target community in design of program; considerations of forced assimilation through integration                        | Decreased prejudice due to increased contact between host and immigrant communities; clear communication to host community around allocation of resources thereby reducing perceived threat of competition                                                                                                                 | Spain   |
| Catarci       | 2012 | Conceptions and Strategies for User Integration across Refugee Services in Italy                                                              | Integrated reception of refugees and asylum seekers (network of hospitals and health services, public employment services, vocational training and continuing education agencies, etc.) | Service coordinators lack tools to support integrated services; lack of continuity between theory and practice in continuing education support | Service coordinators with access to continuing education were more likely to report adequate support; continuing education with intimate knowledge of the context, user needs, and legislation related to refugee inclusion; coordinators should also have a solid network and an ability to distinguish between resources | Italy   |
| Cowell et al  | 2009 | Clinical Trial Outcomes of the Mexican American Problem Solving Program (MAPS)                                                                | A cognitively based problem solving program delivered on linked home visits to mothers and after school program classes to children                                                     | Difficulty managing case load by school nurse of home visits and classes                                                                       | Communication and engagement with the community; partnership with the school                                                                                                                                                                                                                                               | USA     |
| Geltman et al | 2005 | A Private-Sector Preferred Provider Network Model for Public Health Screening of Newly Resettled Refugees                                     | Public-private partnerships using a preferred provider network model for conducting refugee health screening                                                                            | Lack of appropriate funding model leading to delays in health screening                                                                        | Funding streams approved allowed procurement of services; network of providers created; dedicated training of physicians within the network                                                                                                                                                                                | USA     |

|    |                          |      |                                                                                                                                     |                                                                                                                                                                                                                                                               |                                                                                                                                                                                                                                              |                                                                                                                                                                                                                                                                                                       |         |
|----|--------------------------|------|-------------------------------------------------------------------------------------------------------------------------------------|---------------------------------------------------------------------------------------------------------------------------------------------------------------------------------------------------------------------------------------------------------------|----------------------------------------------------------------------------------------------------------------------------------------------------------------------------------------------------------------------------------------------|-------------------------------------------------------------------------------------------------------------------------------------------------------------------------------------------------------------------------------------------------------------------------------------------------------|---------|
| 1  |                          |      |                                                                                                                                     |                                                                                                                                                                                                                                                               |                                                                                                                                                                                                                                              |                                                                                                                                                                                                                                                                                                       |         |
| 2  | <b>Guruge et al</b>      | 2010 | Immigrant women's experiences of receiving care in a mobile health clinic                                                           | Mobile health clinic for reproductive health services for immigrant women                                                                                                                                                                                     | Lack of awareness of available services and navigating health systems; language barrier; fear of deportation leading to lack of use of services                                                                                              | Colocation of services due to the mobile nature of the clinic                                                                                                                                                                                                                                         | Canada  |
| 3  |                          |      |                                                                                                                                     |                                                                                                                                                                                                                                                               |                                                                                                                                                                                                                                              |                                                                                                                                                                                                                                                                                                       |         |
| 4  |                          |      |                                                                                                                                     |                                                                                                                                                                                                                                                               |                                                                                                                                                                                                                                              |                                                                                                                                                                                                                                                                                                       |         |
| 5  |                          |      |                                                                                                                                     |                                                                                                                                                                                                                                                               |                                                                                                                                                                                                                                              |                                                                                                                                                                                                                                                                                                       |         |
| 6  |                          |      |                                                                                                                                     |                                                                                                                                                                                                                                                               |                                                                                                                                                                                                                                              |                                                                                                                                                                                                                                                                                                       |         |
| 7  |                          |      |                                                                                                                                     |                                                                                                                                                                                                                                                               |                                                                                                                                                                                                                                              |                                                                                                                                                                                                                                                                                                       |         |
| 8  |                          |      |                                                                                                                                     |                                                                                                                                                                                                                                                               |                                                                                                                                                                                                                                              |                                                                                                                                                                                                                                                                                                       |         |
| 9  |                          |      |                                                                                                                                     |                                                                                                                                                                                                                                                               |                                                                                                                                                                                                                                              |                                                                                                                                                                                                                                                                                                       |         |
| 10 | <b>Kim et al</b>         | 2002 | Primary health care for Korean immigrants: sustaining a culturally sensitive model                                                  | Translation support; integrated health and social care; mental health support; bilingual advanced nurse practitioner and community advocate serve as system navigators                                                                                        | Budgetary restrictions; existing restrictions in the roles that nurses can play in outreach                                                                                                                                                  | Effective communication around availability of new program; effective communication to announce new outreach and navigation role; efforts to build consensus and coherence across interprofessional teams; clear articulation of the role of advance nurse practitioners and their complementary role | USA     |
| 11 |                          |      |                                                                                                                                     |                                                                                                                                                                                                                                                               |                                                                                                                                                                                                                                              |                                                                                                                                                                                                                                                                                                       |         |
| 12 |                          |      |                                                                                                                                     |                                                                                                                                                                                                                                                               |                                                                                                                                                                                                                                              |                                                                                                                                                                                                                                                                                                       |         |
| 13 |                          |      |                                                                                                                                     |                                                                                                                                                                                                                                                               |                                                                                                                                                                                                                                              |                                                                                                                                                                                                                                                                                                       |         |
| 14 |                          |      |                                                                                                                                     |                                                                                                                                                                                                                                                               |                                                                                                                                                                                                                                              |                                                                                                                                                                                                                                                                                                       |         |
| 15 |                          |      |                                                                                                                                     |                                                                                                                                                                                                                                                               |                                                                                                                                                                                                                                              |                                                                                                                                                                                                                                                                                                       |         |
| 16 |                          |      |                                                                                                                                     |                                                                                                                                                                                                                                                               |                                                                                                                                                                                                                                              |                                                                                                                                                                                                                                                                                                       |         |
| 17 |                          |      |                                                                                                                                     |                                                                                                                                                                                                                                                               |                                                                                                                                                                                                                                              |                                                                                                                                                                                                                                                                                                       |         |
| 18 | <b>Lilleston et al</b>   | 2018 | Evaluation of a mobile approach to gender-based violence service delivery among Syrian refugees in Lebanon                          | GBV mobile support service, providing safe spaces, community outreach, psychosocial support activities, safe legal and medical referrals, survivor-centred approach, adherence to confidentiality, and access to face-to-face and phone-based case management | Trust-building is a key element and so constant mobility of target audience presented a challenge as did referral of services as quality medical and legal services were not always safe or available                                        | Integration of legal and medical teams in mobile GBV support teams; community mobilizers/system navigator role is a key function                                                                                                                                                                      | Lebanon |
| 19 |                          |      |                                                                                                                                     |                                                                                                                                                                                                                                                               |                                                                                                                                                                                                                                              |                                                                                                                                                                                                                                                                                                       |         |
| 20 |                          |      |                                                                                                                                     |                                                                                                                                                                                                                                                               |                                                                                                                                                                                                                                              |                                                                                                                                                                                                                                                                                                       |         |
| 21 |                          |      |                                                                                                                                     |                                                                                                                                                                                                                                                               |                                                                                                                                                                                                                                              |                                                                                                                                                                                                                                                                                                       |         |
| 22 |                          |      |                                                                                                                                     |                                                                                                                                                                                                                                                               |                                                                                                                                                                                                                                              |                                                                                                                                                                                                                                                                                                       |         |
| 23 |                          |      |                                                                                                                                     |                                                                                                                                                                                                                                                               |                                                                                                                                                                                                                                              |                                                                                                                                                                                                                                                                                                       |         |
| 24 |                          |      |                                                                                                                                     |                                                                                                                                                                                                                                                               |                                                                                                                                                                                                                                              |                                                                                                                                                                                                                                                                                                       |         |
| 25 |                          |      |                                                                                                                                     |                                                                                                                                                                                                                                                               |                                                                                                                                                                                                                                              |                                                                                                                                                                                                                                                                                                       |         |
| 26 |                          |      |                                                                                                                                     |                                                                                                                                                                                                                                                               |                                                                                                                                                                                                                                              |                                                                                                                                                                                                                                                                                                       |         |
| 27 |                          |      |                                                                                                                                     |                                                                                                                                                                                                                                                               |                                                                                                                                                                                                                                              |                                                                                                                                                                                                                                                                                                       |         |
| 28 | <b>Macfarlane et al.</b> | 2009 | Language barriers in health and social care consultations in the community: A comparative study of responses in Ireland and England | Translation support                                                                                                                                                                                                                                           | Use of unpaid interpreters from patients' social networks is complex; only one accredited course for professional interpreters; use of professional interpreters patchy due to low quality and institutional challenges in their acquisition | In England where there is a policy to use language services (Race Equality Policy), there is more use than in Ireland but implementation remains poor                                                                                                                                                 | UK      |
| 29 |                          |      |                                                                                                                                     |                                                                                                                                                                                                                                                               |                                                                                                                                                                                                                                              |                                                                                                                                                                                                                                                                                                       |         |
| 30 |                          |      |                                                                                                                                     |                                                                                                                                                                                                                                                               |                                                                                                                                                                                                                                              |                                                                                                                                                                                                                                                                                                       |         |
| 31 |                          |      |                                                                                                                                     |                                                                                                                                                                                                                                                               |                                                                                                                                                                                                                                              |                                                                                                                                                                                                                                                                                                       |         |
| 32 |                          |      |                                                                                                                                     |                                                                                                                                                                                                                                                               |                                                                                                                                                                                                                                              |                                                                                                                                                                                                                                                                                                       |         |
| 33 |                          |      |                                                                                                                                     |                                                                                                                                                                                                                                                               |                                                                                                                                                                                                                                              |                                                                                                                                                                                                                                                                                                       |         |
| 34 | <b>McMurray et al.</b>   | 2013 | Integrated Primary Care Improves Access to Healthcare for Newly Arrived Refugees in Canada                                          | Translation support; integrated health and social care; Gateway services and system navigators                                                                                                                                                                | Shortage of primary care physicians which is the gateway; bureaucracy when billing Canada's Interim Federal Health Program (IFHP) that provides coverage for health care costs until provincial health insurance is available                | Relationships between local physician community and case workers (navigators); timely transfer of records; ongoing consultations post-transfer                                                                                                                                                        | Canada  |
| 35 |                          |      |                                                                                                                                     |                                                                                                                                                                                                                                                               |                                                                                                                                                                                                                                              |                                                                                                                                                                                                                                                                                                       |         |
| 36 |                          |      |                                                                                                                                     |                                                                                                                                                                                                                                                               |                                                                                                                                                                                                                                              |                                                                                                                                                                                                                                                                                                       |         |
| 37 |                          |      |                                                                                                                                     |                                                                                                                                                                                                                                                               |                                                                                                                                                                                                                                              |                                                                                                                                                                                                                                                                                                       |         |
| 38 |                          |      |                                                                                                                                     |                                                                                                                                                                                                                                                               |                                                                                                                                                                                                                                              |                                                                                                                                                                                                                                                                                                       |         |
| 39 |                          |      |                                                                                                                                     |                                                                                                                                                                                                                                                               |                                                                                                                                                                                                                                              |                                                                                                                                                                                                                                                                                                       |         |
| 40 |                          |      |                                                                                                                                     |                                                                                                                                                                                                                                                               |                                                                                                                                                                                                                                              |                                                                                                                                                                                                                                                                                                       |         |
| 41 |                          |      |                                                                                                                                     |                                                                                                                                                                                                                                                               |                                                                                                                                                                                                                                              |                                                                                                                                                                                                                                                                                                       |         |
| 42 |                          |      |                                                                                                                                     |                                                                                                                                                                                                                                                               |                                                                                                                                                                                                                                              |                                                                                                                                                                                                                                                                                                       |         |
| 43 |                          |      |                                                                                                                                     |                                                                                                                                                                                                                                                               |                                                                                                                                                                                                                                              |                                                                                                                                                                                                                                                                                                       |         |
| 44 |                          |      |                                                                                                                                     |                                                                                                                                                                                                                                                               |                                                                                                                                                                                                                                              |                                                                                                                                                                                                                                                                                                       |         |
| 45 |                          |      |                                                                                                                                     |                                                                                                                                                                                                                                                               |                                                                                                                                                                                                                                              |                                                                                                                                                                                                                                                                                                       |         |
| 46 |                          |      |                                                                                                                                     |                                                                                                                                                                                                                                                               |                                                                                                                                                                                                                                              |                                                                                                                                                                                                                                                                                                       |         |
| 47 |                          |      |                                                                                                                                     |                                                                                                                                                                                                                                                               |                                                                                                                                                                                                                                              |                                                                                                                                                                                                                                                                                                       |         |



|    |                          |      |                                                                                                                                                                                 |                                                                                                                                                            |                                                                                                                                                                                                                                                                                                                                                                            |                                                                                                                                                                                                                       |                   |
|----|--------------------------|------|---------------------------------------------------------------------------------------------------------------------------------------------------------------------------------|------------------------------------------------------------------------------------------------------------------------------------------------------------|----------------------------------------------------------------------------------------------------------------------------------------------------------------------------------------------------------------------------------------------------------------------------------------------------------------------------------------------------------------------------|-----------------------------------------------------------------------------------------------------------------------------------------------------------------------------------------------------------------------|-------------------|
| 1  |                          |      |                                                                                                                                                                                 |                                                                                                                                                            |                                                                                                                                                                                                                                                                                                                                                                            |                                                                                                                                                                                                                       |                   |
| 2  | <b>McNaughton et al.</b> | 2010 | Directions for Refining a School Nursing Intervention for Mexican Immigrant Families                                                                                            | Active case finding and problem solving through education system (school nurses); translation support                                                      | Schools with no existing nursing outreach program were difficult to start at                                                                                                                                                                                                                                                                                               | Nursing role was recognized and accepted by immigrant communities; schools that had a nursing program already could expand it to active case finding with immigrant families                                          | Mexico            |
| 3  |                          |      |                                                                                                                                                                                 |                                                                                                                                                            |                                                                                                                                                                                                                                                                                                                                                                            |                                                                                                                                                                                                                       |                   |
| 4  |                          |      |                                                                                                                                                                                 |                                                                                                                                                            |                                                                                                                                                                                                                                                                                                                                                                            |                                                                                                                                                                                                                       |                   |
| 5  |                          |      |                                                                                                                                                                                 |                                                                                                                                                            |                                                                                                                                                                                                                                                                                                                                                                            |                                                                                                                                                                                                                       |                   |
| 6  |                          |      |                                                                                                                                                                                 |                                                                                                                                                            |                                                                                                                                                                                                                                                                                                                                                                            |                                                                                                                                                                                                                       |                   |
| 7  | <b>Mortensen</b>         | 2011 | Public Health System Responsiveness To Refugee Groups In New Zealand: Activation From The Bottom Up                                                                             | Physician-driven needs-based programs in primary care                                                                                                      | Mismatch between policies at national vs local level; lack of demographic data; no long-term planning or projected needs; low linkages between district health branch, public health offices, and NGOs; low health literacy due to lack of translated materials                                                                                                            | Quota refugees have same access to services as host communities; local action activated by physicians and community leaders led to more coverage and higher quality services in specific areas that had more advocacy | New Zealand       |
| 8  |                          |      |                                                                                                                                                                                 |                                                                                                                                                            |                                                                                                                                                                                                                                                                                                                                                                            |                                                                                                                                                                                                                       |                   |
| 9  |                          |      |                                                                                                                                                                                 |                                                                                                                                                            |                                                                                                                                                                                                                                                                                                                                                                            |                                                                                                                                                                                                                       |                   |
| 10 |                          |      |                                                                                                                                                                                 |                                                                                                                                                            |                                                                                                                                                                                                                                                                                                                                                                            |                                                                                                                                                                                                                       |                   |
| 11 |                          |      |                                                                                                                                                                                 |                                                                                                                                                            |                                                                                                                                                                                                                                                                                                                                                                            |                                                                                                                                                                                                                       |                   |
| 12 |                          |      |                                                                                                                                                                                 |                                                                                                                                                            |                                                                                                                                                                                                                                                                                                                                                                            |                                                                                                                                                                                                                       |                   |
| 13 |                          |      |                                                                                                                                                                                 |                                                                                                                                                            |                                                                                                                                                                                                                                                                                                                                                                            |                                                                                                                                                                                                                       |                   |
| 14 |                          |      |                                                                                                                                                                                 |                                                                                                                                                            |                                                                                                                                                                                                                                                                                                                                                                            |                                                                                                                                                                                                                       |                   |
| 15 |                          |      |                                                                                                                                                                                 |                                                                                                                                                            |                                                                                                                                                                                                                                                                                                                                                                            |                                                                                                                                                                                                                       |                   |
| 16 | <b>Philbin</b>           | 2018 | State-level immigration and immigrant-focused policies as drivers of Latino health disparities in the United States                                                             | Policies to address social and legal determinants of health as they relate to immigrant populations                                                        | Exclusionary policies affect social determinants of health, especially in mixed status families; families unwilling to participate in social programs due to fear and confusion over entitlements; structural racism; restrictions in accessing education and employment; low mobility and relocation to remote areas with low availability of integrated social services. | Elimination of waiting period in several states for access to medicaid regardless of immigration status; extra funding to federally qualified health centres                                                          | USA               |
| 17 |                          |      |                                                                                                                                                                                 |                                                                                                                                                            |                                                                                                                                                                                                                                                                                                                                                                            |                                                                                                                                                                                                                       |                   |
| 18 |                          |      |                                                                                                                                                                                 |                                                                                                                                                            |                                                                                                                                                                                                                                                                                                                                                                            |                                                                                                                                                                                                                       |                   |
| 19 |                          |      |                                                                                                                                                                                 |                                                                                                                                                            |                                                                                                                                                                                                                                                                                                                                                                            |                                                                                                                                                                                                                       |                   |
| 20 |                          |      |                                                                                                                                                                                 |                                                                                                                                                            |                                                                                                                                                                                                                                                                                                                                                                            |                                                                                                                                                                                                                       |                   |
| 21 |                          |      |                                                                                                                                                                                 |                                                                                                                                                            |                                                                                                                                                                                                                                                                                                                                                                            |                                                                                                                                                                                                                       |                   |
| 22 |                          |      |                                                                                                                                                                                 |                                                                                                                                                            |                                                                                                                                                                                                                                                                                                                                                                            |                                                                                                                                                                                                                       |                   |
| 23 |                          |      |                                                                                                                                                                                 |                                                                                                                                                            |                                                                                                                                                                                                                                                                                                                                                                            |                                                                                                                                                                                                                       |                   |
| 24 |                          |      |                                                                                                                                                                                 |                                                                                                                                                            |                                                                                                                                                                                                                                                                                                                                                                            |                                                                                                                                                                                                                       |                   |
| 25 | <b>Stewart et al.</b>    | 2008 | Multicultural Meanings of Social Support among Immigrants and Refugees                                                                                                          | Policies to address social and legal determinants of health as they relate to immigrant populations; social networking                                     | Inadequate financial and human resources, limited agency mandates, ineffective collaboration with other sectors, and low staff morale; collaboration impeded by the volume of organizations involved                                                                                                                                                                       | Existing networks of longer term immigrants were supportive in overcoming access barriers                                                                                                                             | Canada            |
| 26 |                          |      |                                                                                                                                                                                 |                                                                                                                                                            |                                                                                                                                                                                                                                                                                                                                                                            |                                                                                                                                                                                                                       |                   |
| 27 |                          |      |                                                                                                                                                                                 |                                                                                                                                                            |                                                                                                                                                                                                                                                                                                                                                                            |                                                                                                                                                                                                                       |                   |
| 28 |                          |      |                                                                                                                                                                                 |                                                                                                                                                            |                                                                                                                                                                                                                                                                                                                                                                            |                                                                                                                                                                                                                       |                   |
| 29 |                          |      |                                                                                                                                                                                 |                                                                                                                                                            |                                                                                                                                                                                                                                                                                                                                                                            |                                                                                                                                                                                                                       |                   |
| 30 | <b>Tuepker et al.,</b>   | 2009 | Evaluating integrated healthcare for refugees and hosts in an African context                                                                                                   | Integrating host and refugee healthcare by reorganizing ministries to incorporate refugee services into existing portfolios rather than under one ministry | Lack of evidence on the added value of integrated care; concern around minimizing exceptional status of refugees; no legal obligation to provide integrated care; turf wars across organizations and sectors                                                                                                                                                               | Funding streams from international organizations to national health services                                                                                                                                          | Ethiopia & Uganda |
| 31 |                          |      |                                                                                                                                                                                 |                                                                                                                                                            |                                                                                                                                                                                                                                                                                                                                                                            |                                                                                                                                                                                                                       |                   |
| 32 |                          |      |                                                                                                                                                                                 |                                                                                                                                                            |                                                                                                                                                                                                                                                                                                                                                                            |                                                                                                                                                                                                                       |                   |
| 33 |                          |      |                                                                                                                                                                                 |                                                                                                                                                            |                                                                                                                                                                                                                                                                                                                                                                            |                                                                                                                                                                                                                       |                   |
| 34 |                          |      |                                                                                                                                                                                 |                                                                                                                                                            |                                                                                                                                                                                                                                                                                                                                                                            |                                                                                                                                                                                                                       |                   |
| 35 |                          |      |                                                                                                                                                                                 |                                                                                                                                                            |                                                                                                                                                                                                                                                                                                                                                                            |                                                                                                                                                                                                                       |                   |
| 36 | <b>Verhagen et al</b>    | 2013 | Culturally sensitive care for elderly immigrants through ethnic community health workers: design and development of a community based intervention programme in the Netherlands | Use of ethnically similar CHWs to deliver health and social care; active case finding; community-driven problem solving with oversight by CHWs             | Lack of participation by target community in culturally-sensitive design; limited knowledge by target community around availability of services                                                                                                                                                                                                                            | Use of ethnically-similar CHWs                                                                                                                                                                                        | Netherlands       |
| 37 |                          |      |                                                                                                                                                                                 |                                                                                                                                                            |                                                                                                                                                                                                                                                                                                                                                                            |                                                                                                                                                                                                                       |                   |
| 38 |                          |      |                                                                                                                                                                                 |                                                                                                                                                            |                                                                                                                                                                                                                                                                                                                                                                            |                                                                                                                                                                                                                       |                   |
| 39 |                          |      |                                                                                                                                                                                 |                                                                                                                                                            |                                                                                                                                                                                                                                                                                                                                                                            |                                                                                                                                                                                                                       |                   |
| 40 |                          |      |                                                                                                                                                                                 |                                                                                                                                                            |                                                                                                                                                                                                                                                                                                                                                                            |                                                                                                                                                                                                                       |                   |
| 41 |                          |      |                                                                                                                                                                                 |                                                                                                                                                            |                                                                                                                                                                                                                                                                                                                                                                            |                                                                                                                                                                                                                       |                   |
| 42 |                          |      |                                                                                                                                                                                 |                                                                                                                                                            |                                                                                                                                                                                                                                                                                                                                                                            |                                                                                                                                                                                                                       |                   |
| 43 |                          |      |                                                                                                                                                                                 |                                                                                                                                                            |                                                                                                                                                                                                                                                                                                                                                                            |                                                                                                                                                                                                                       |                   |
| 44 |                          |      |                                                                                                                                                                                 |                                                                                                                                                            |                                                                                                                                                                                                                                                                                                                                                                            |                                                                                                                                                                                                                       |                   |
| 45 |                          |      |                                                                                                                                                                                 |                                                                                                                                                            |                                                                                                                                                                                                                                                                                                                                                                            |                                                                                                                                                                                                                       |                   |
| 46 |                          |      |                                                                                                                                                                                 |                                                                                                                                                            |                                                                                                                                                                                                                                                                                                                                                                            |                                                                                                                                                                                                                       |                   |
| 47 |                          |      |                                                                                                                                                                                 |                                                                                                                                                            |                                                                                                                                                                                                                                                                                                                                                                            |                                                                                                                                                                                                                       |                   |

|    |                        |      |                                                                                                                  |                                                                                                                                                                                                                                                                                                                                               |                                                                                                                                                                                                        |                                                                                                                                                                                                                                                                                                                                                                                                                                                                                   |           |
|----|------------------------|------|------------------------------------------------------------------------------------------------------------------|-----------------------------------------------------------------------------------------------------------------------------------------------------------------------------------------------------------------------------------------------------------------------------------------------------------------------------------------------|--------------------------------------------------------------------------------------------------------------------------------------------------------------------------------------------------------|-----------------------------------------------------------------------------------------------------------------------------------------------------------------------------------------------------------------------------------------------------------------------------------------------------------------------------------------------------------------------------------------------------------------------------------------------------------------------------------|-----------|
| 1  |                        |      |                                                                                                                  |                                                                                                                                                                                                                                                                                                                                               |                                                                                                                                                                                                        |                                                                                                                                                                                                                                                                                                                                                                                                                                                                                   |           |
| 2  | <b>Woodland et al</b>  | 2016 | Evaluation of a school screening programme for young people from refugee backgrounds                             | Active case finding and problem solving through education system (school nurses); translation support                                                                                                                                                                                                                                         | Poor integration of multiple service providers; lack of funding                                                                                                                                        | Integration within the school; informal communication between clinicians and the school                                                                                                                                                                                                                                                                                                                                                                                           | Australia |
| 3  |                        |      |                                                                                                                  |                                                                                                                                                                                                                                                                                                                                               |                                                                                                                                                                                                        |                                                                                                                                                                                                                                                                                                                                                                                                                                                                                   |           |
| 4  |                        |      |                                                                                                                  |                                                                                                                                                                                                                                                                                                                                               |                                                                                                                                                                                                        |                                                                                                                                                                                                                                                                                                                                                                                                                                                                                   |           |
| 5  |                        |      |                                                                                                                  |                                                                                                                                                                                                                                                                                                                                               |                                                                                                                                                                                                        |                                                                                                                                                                                                                                                                                                                                                                                                                                                                                   |           |
| 6  | <b>Woodland et al.</b> | 2010 | Health service delivery for newly arrived refugee children: A framework for good practice                        | Comprehensive, colocated screening services; partnerships between community and health services (refugee health nurse as system navigator); transportation services to access centres; specific training provided to physicians and other care providers, including referral pathways; Pharmaceutical benefit scheme addressing refugee needs | Lack of coordinated policy for all categories of refugees and asylum seekers; administrative burden of PHC coordination; lack of information for managing conditions specific or prominent to refugees | Family-based services (colocation to address family needs); refugee health nurses (system navigators) decrease administrative burden of coordination; consumer participation and consultation; colocation of screening services ; transportation support for getting to services; strong health information systems; data and consultations used to inform the direction of intersectoral collaboration and nature of partnerships between health and community service providers | Australia |
| 7  |                        |      |                                                                                                                  |                                                                                                                                                                                                                                                                                                                                               |                                                                                                                                                                                                        |                                                                                                                                                                                                                                                                                                                                                                                                                                                                                   |           |
| 8  |                        |      |                                                                                                                  |                                                                                                                                                                                                                                                                                                                                               |                                                                                                                                                                                                        |                                                                                                                                                                                                                                                                                                                                                                                                                                                                                   |           |
| 9  |                        |      |                                                                                                                  |                                                                                                                                                                                                                                                                                                                                               |                                                                                                                                                                                                        |                                                                                                                                                                                                                                                                                                                                                                                                                                                                                   |           |
| 10 |                        |      |                                                                                                                  |                                                                                                                                                                                                                                                                                                                                               |                                                                                                                                                                                                        |                                                                                                                                                                                                                                                                                                                                                                                                                                                                                   |           |
| 11 |                        |      |                                                                                                                  |                                                                                                                                                                                                                                                                                                                                               |                                                                                                                                                                                                        |                                                                                                                                                                                                                                                                                                                                                                                                                                                                                   |           |
| 12 |                        |      |                                                                                                                  |                                                                                                                                                                                                                                                                                                                                               |                                                                                                                                                                                                        |                                                                                                                                                                                                                                                                                                                                                                                                                                                                                   |           |
| 13 |                        |      |                                                                                                                  |                                                                                                                                                                                                                                                                                                                                               |                                                                                                                                                                                                        |                                                                                                                                                                                                                                                                                                                                                                                                                                                                                   |           |
| 14 |                        |      |                                                                                                                  |                                                                                                                                                                                                                                                                                                                                               |                                                                                                                                                                                                        |                                                                                                                                                                                                                                                                                                                                                                                                                                                                                   |           |
| 15 |                        |      |                                                                                                                  |                                                                                                                                                                                                                                                                                                                                               |                                                                                                                                                                                                        |                                                                                                                                                                                                                                                                                                                                                                                                                                                                                   |           |
| 16 |                        |      |                                                                                                                  |                                                                                                                                                                                                                                                                                                                                               |                                                                                                                                                                                                        |                                                                                                                                                                                                                                                                                                                                                                                                                                                                                   |           |
| 17 |                        |      |                                                                                                                  |                                                                                                                                                                                                                                                                                                                                               |                                                                                                                                                                                                        |                                                                                                                                                                                                                                                                                                                                                                                                                                                                                   |           |
| 18 |                        |      |                                                                                                                  |                                                                                                                                                                                                                                                                                                                                               |                                                                                                                                                                                                        |                                                                                                                                                                                                                                                                                                                                                                                                                                                                                   |           |
| 19 | <b>Yeung et al</b>     | 2004 | Integrating psychiatry and primary care improves acceptability to mental health services among Chinese Americans | Specific training provided to physicians and other care providers; mental health support (colocation of mental health services); primary care nurse as a bridge/ system navigator for referrals;                                                                                                                                              | Funding for coordination outside purview of essential services; lack of knowledge on culturally-appropriate mental health services                                                                     | Co-location of primary care and mental health services; designated staff as the bridge; training of service providers                                                                                                                                                                                                                                                                                                                                                             | USA       |
| 20 |                        |      |                                                                                                                  |                                                                                                                                                                                                                                                                                                                                               |                                                                                                                                                                                                        |                                                                                                                                                                                                                                                                                                                                                                                                                                                                                   |           |
| 21 |                        |      |                                                                                                                  |                                                                                                                                                                                                                                                                                                                                               |                                                                                                                                                                                                        |                                                                                                                                                                                                                                                                                                                                                                                                                                                                                   |           |
| 22 |                        |      |                                                                                                                  |                                                                                                                                                                                                                                                                                                                                               |                                                                                                                                                                                                        |                                                                                                                                                                                                                                                                                                                                                                                                                                                                                   |           |
| 23 |                        |      |                                                                                                                  |                                                                                                                                                                                                                                                                                                                                               |                                                                                                                                                                                                        |                                                                                                                                                                                                                                                                                                                                                                                                                                                                                   |           |
| 24 |                        |      |                                                                                                                  |                                                                                                                                                                                                                                                                                                                                               |                                                                                                                                                                                                        |                                                                                                                                                                                                                                                                                                                                                                                                                                                                                   |           |
| 25 |                        |      |                                                                                                                  |                                                                                                                                                                                                                                                                                                                                               |                                                                                                                                                                                                        |                                                                                                                                                                                                                                                                                                                                                                                                                                                                                   |           |
| 26 |                        |      |                                                                                                                  |                                                                                                                                                                                                                                                                                                                                               |                                                                                                                                                                                                        |                                                                                                                                                                                                                                                                                                                                                                                                                                                                                   |           |
| 27 |                        |      |                                                                                                                  |                                                                                                                                                                                                                                                                                                                                               |                                                                                                                                                                                                        |                                                                                                                                                                                                                                                                                                                                                                                                                                                                                   |           |
| 28 |                        |      |                                                                                                                  |                                                                                                                                                                                                                                                                                                                                               |                                                                                                                                                                                                        |                                                                                                                                                                                                                                                                                                                                                                                                                                                                                   |           |
| 29 |                        |      |                                                                                                                  |                                                                                                                                                                                                                                                                                                                                               |                                                                                                                                                                                                        |                                                                                                                                                                                                                                                                                                                                                                                                                                                                                   |           |
| 30 |                        |      |                                                                                                                  |                                                                                                                                                                                                                                                                                                                                               |                                                                                                                                                                                                        |                                                                                                                                                                                                                                                                                                                                                                                                                                                                                   |           |
| 31 |                        |      |                                                                                                                  |                                                                                                                                                                                                                                                                                                                                               |                                                                                                                                                                                                        |                                                                                                                                                                                                                                                                                                                                                                                                                                                                                   |           |
| 32 |                        |      |                                                                                                                  |                                                                                                                                                                                                                                                                                                                                               |                                                                                                                                                                                                        |                                                                                                                                                                                                                                                                                                                                                                                                                                                                                   |           |
| 33 |                        |      |                                                                                                                  |                                                                                                                                                                                                                                                                                                                                               |                                                                                                                                                                                                        |                                                                                                                                                                                                                                                                                                                                                                                                                                                                                   |           |
| 34 |                        |      |                                                                                                                  |                                                                                                                                                                                                                                                                                                                                               |                                                                                                                                                                                                        |                                                                                                                                                                                                                                                                                                                                                                                                                                                                                   |           |
| 35 |                        |      |                                                                                                                  |                                                                                                                                                                                                                                                                                                                                               |                                                                                                                                                                                                        |                                                                                                                                                                                                                                                                                                                                                                                                                                                                                   |           |
| 36 |                        |      |                                                                                                                  |                                                                                                                                                                                                                                                                                                                                               |                                                                                                                                                                                                        |                                                                                                                                                                                                                                                                                                                                                                                                                                                                                   |           |
| 37 |                        |      |                                                                                                                  |                                                                                                                                                                                                                                                                                                                                               |                                                                                                                                                                                                        |                                                                                                                                                                                                                                                                                                                                                                                                                                                                                   |           |
| 38 |                        |      |                                                                                                                  |                                                                                                                                                                                                                                                                                                                                               |                                                                                                                                                                                                        |                                                                                                                                                                                                                                                                                                                                                                                                                                                                                   |           |
| 39 |                        |      |                                                                                                                  |                                                                                                                                                                                                                                                                                                                                               |                                                                                                                                                                                                        |                                                                                                                                                                                                                                                                                                                                                                                                                                                                                   |           |
| 40 |                        |      |                                                                                                                  |                                                                                                                                                                                                                                                                                                                                               |                                                                                                                                                                                                        |                                                                                                                                                                                                                                                                                                                                                                                                                                                                                   |           |
| 41 |                        |      |                                                                                                                  |                                                                                                                                                                                                                                                                                                                                               |                                                                                                                                                                                                        |                                                                                                                                                                                                                                                                                                                                                                                                                                                                                   |           |
| 42 |                        |      |                                                                                                                  |                                                                                                                                                                                                                                                                                                                                               |                                                                                                                                                                                                        |                                                                                                                                                                                                                                                                                                                                                                                                                                                                                   |           |
| 43 |                        |      |                                                                                                                  |                                                                                                                                                                                                                                                                                                                                               |                                                                                                                                                                                                        |                                                                                                                                                                                                                                                                                                                                                                                                                                                                                   |           |
| 44 |                        |      |                                                                                                                  |                                                                                                                                                                                                                                                                                                                                               |                                                                                                                                                                                                        |                                                                                                                                                                                                                                                                                                                                                                                                                                                                                   |           |
| 45 |                        |      |                                                                                                                  |                                                                                                                                                                                                                                                                                                                                               |                                                                                                                                                                                                        |                                                                                                                                                                                                                                                                                                                                                                                                                                                                                   |           |
| 46 |                        |      |                                                                                                                  |                                                                                                                                                                                                                                                                                                                                               |                                                                                                                                                                                                        |                                                                                                                                                                                                                                                                                                                                                                                                                                                                                   |           |
| 47 |                        |      |                                                                                                                  |                                                                                                                                                                                                                                                                                                                                               |                                                                                                                                                                                                        |                                                                                                                                                                                                                                                                                                                                                                                                                                                                                   |           |

Table 3. Enabling strategies present across studies

| Strategy                                                                   | Studies          |                  |                      |                      |                     |                 |              |
|----------------------------------------------------------------------------|------------------|------------------|----------------------|----------------------|---------------------|-----------------|--------------|
| Host community engagement                                                  | Calvo et al      |                  |                      |                      |                     |                 |              |
| System navigation                                                          | Calvo et al      | Kim et al        | McMurray et al       | Woodland et al, 2010 | Yeung et al         | Lilleston et al |              |
| Integrated health and social services through networked approach           | Catarci          | Kim et al        | McMurray et al       | Yeung et al          |                     |                 |              |
| Translation support                                                        | Kim et al        | MacFarlane et al | McMurray et al       | McNaughton et al     | Woodland et al 2016 | Cowell et al    | Guruge et al |
| Active case finding/Outreach                                               | McNaughton et al | Verhagen et al   | Woodland et al 2016  | Guruge et al         |                     |                 |              |
| Refugee-specific service delivery and access to health and social networks | Mortensen        | Philbin et al    | Stewart et al        | Verhagen et al       |                     |                 |              |
| Legislative support                                                        | Philbin et al    | Tuepker et al    | Woodland et al, 2010 | Geltman et al        |                     |                 |              |
| Changes in funding modalities                                              | Tuepker et al    |                  |                      |                      |                     |                 |              |

Table 4. Barriers &amp; Facilitators Commonly Discussed Across Studies

| Elements                                                            | Element present as barrier                                               | Element present as facilitator                                    |
|---------------------------------------------------------------------|--------------------------------------------------------------------------|-------------------------------------------------------------------|
| Community engagement                                                | Calvo et al; Verhagen et al                                              | Kim et al; Mortensen; McMurray et al ; Cowell et al               |
| Communication between host and refugee communities                  |                                                                          | Calvo et al; Woodland et al, 2016                                 |
| Tools/training for service providers to support integrated services | Catarci; MacFarlane et al; Woodland et al, 2010                          | Woodland et al, 2010; Yeung et al ; Geltman et al                 |
| Colocation of services                                              |                                                                          | Woodland et al, 2010; Yeung et al; Lilleston et al ; Guruge et al |
| Transportation                                                      |                                                                          | Woodland et al, 2010                                              |
| Networks between providers                                          |                                                                          | Catarci; Stewart et al; Geltman et al                             |
| Budget/Appropriate Funding Streams                                  | Kim et al; McMurray et al; Stewart et al                                 | Philbin; Tuepker et al; Geltman et al                             |
| Role definitions                                                    | Kim et al                                                                | McNaughton et al; Lilleston et al; Yeung et al                    |
| Interprofessional team management                                   | Stewart et al; Woodland et al, 2016                                      | Kim et al                                                         |
| Refugee-specific policies                                           | Mortensen; Philbin; Tuepker et al; Woodland et al, 2010; Lilleston et al | MacFarlane et al; Philbin                                         |
| Data                                                                | Mortensen; Tuepker et al                                                 |                                                                   |
| Organizational turf                                                 | Stewart et al; Tuepker et al                                             |                                                                   |

## Preferred Reporting Items for Systematic reviews and Meta-Analyses extension for Scoping Reviews (PRISMA-ScR) Checklist

| SECTION                           | ITEM | PRISMA-ScR CHECKLIST ITEM                                                                                                                                                                                                                                                                                  | REPORTED ON PAGE #                                                                                        |
|-----------------------------------|------|------------------------------------------------------------------------------------------------------------------------------------------------------------------------------------------------------------------------------------------------------------------------------------------------------------|-----------------------------------------------------------------------------------------------------------|
| <b>TITLE</b>                      |      |                                                                                                                                                                                                                                                                                                            |                                                                                                           |
| Title                             | 1    | Identify the report as a scoping review.                                                                                                                                                                                                                                                                   | p. 1                                                                                                      |
| <b>ABSTRACT</b>                   |      |                                                                                                                                                                                                                                                                                                            |                                                                                                           |
| Structured summary                | 2    | Provide a structured summary that includes (as applicable): background, objectives, eligibility criteria, sources of evidence, charting methods, results, and conclusions that relate to the review questions and objectives.                                                                              | p. 2                                                                                                      |
| <b>INTRODUCTION</b>               |      |                                                                                                                                                                                                                                                                                                            |                                                                                                           |
| Rationale                         | 3    | Describe the rationale for the review in the context of what is already known. Explain why the review questions/objectives lend themselves to a scoping review approach.                                                                                                                                   | p. 5                                                                                                      |
| Objectives                        | 4    | Provide an explicit statement of the questions and objectives being addressed with reference to their key elements (e.g., population or participants, concepts, and context) or other relevant key elements used to conceptualize the review questions and/or objectives.                                  | p. 5                                                                                                      |
| <b>METHODS</b>                    |      |                                                                                                                                                                                                                                                                                                            |                                                                                                           |
| Protocol and registration         | 5    | Indicate whether a review protocol exists; state if and where it can be accessed (e.g., a Web address); and if available, provide registration information, including the registration number.                                                                                                             | p. 2<br>Registered on Open Science Framework<br><a href="https://osf.io/gt9ck/">https://osf.io/gt9ck/</a> |
| Eligibility criteria              | 6    | Specify characteristics of the sources of evidence used as eligibility criteria (e.g., years considered, language, and publication status), and provide a rationale.                                                                                                                                       | p. 6                                                                                                      |
| Information sources*              | 7    | Describe all information sources in the search (e.g., databases with dates of coverage and contact with authors to identify additional sources), as well as the date the most recent search was executed.                                                                                                  | p. 23-26                                                                                                  |
| Search                            | 8    | Present the full electronic search strategy for at least 1 database, including any limits used, such that it could be repeated.                                                                                                                                                                            | p. 23-26                                                                                                  |
| Selection of sources of evidence† | 9    | State the process for selecting sources of evidence (i.e., screening and eligibility) included in the scoping review.                                                                                                                                                                                      | p. 6-7                                                                                                    |
| Data charting process‡            | 10   | Describe the methods of charting data from the included sources of evidence (e.g., calibrated forms or forms that have been tested by the team before their use, and whether data charting was done independently or in duplicate) and any processes for obtaining and confirming data from investigators. | p. 8                                                                                                      |
| Data items                        | 11   | List and define all variables for which data were sought and any assumptions and simplifications made.                                                                                                                                                                                                     | p. 6-8                                                                                                    |
| Critical appraisal                | 12   | If done, provide a rationale for conducting a                                                                                                                                                                                                                                                              | p. 15                                                                                                     |

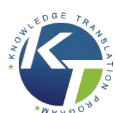

| SECTION                                       | ITEM | PRISMA-ScR CHECKLIST ITEM                                                                                                                                                                       | REPORTED ON PAGE #  |
|-----------------------------------------------|------|-------------------------------------------------------------------------------------------------------------------------------------------------------------------------------------------------|---------------------|
| of individual sources of evidence§            |      | critical appraisal of included sources of evidence; describe the methods used and how this information was used in any data synthesis (if appropriate).                                         |                     |
| Synthesis of results                          | 13   | Describe the methods of handling and summarizing the data that were charted.                                                                                                                    | p. 8                |
| <b>RESULTS</b>                                |      |                                                                                                                                                                                                 |                     |
| Selection of sources of evidence              | 14   | Give numbers of sources of evidence screened, assessed for eligibility, and included in the review, with reasons for exclusions at each stage, ideally using a flow diagram.                    | p. 7                |
| Characteristics of sources of evidence        | 15   | For each source of evidence, present characteristics for which data were charted and provide the citations.                                                                                     | p. 8-9              |
| Critical appraisal within sources of evidence | 16   | If done, present data on critical appraisal of included sources of evidence (see item 12).                                                                                                      | p. 15               |
| Results of individual sources of evidence     | 17   | For each included source of evidence, present the relevant data that were charted that relate to the review questions and objectives.                                                           | p. 9-11, tables 2-4 |
| Synthesis of results                          | 18   | Summarize and/or present the charting results as they relate to the review questions and objectives.                                                                                            | p. 8-9; table 2-4   |
| <b>DISCUSSION</b>                             |      |                                                                                                                                                                                                 |                     |
| Summary of evidence                           | 19   | Summarize the main results (including an overview of concepts, themes, and types of evidence available), link to the review questions and objectives, and consider the relevance to key groups. | p. 12-16            |
| Limitations                                   | 20   | Discuss the limitations of the scoping review process.                                                                                                                                          | p. 15-26            |
| Conclusions                                   | 21   | Provide a general interpretation of the results with respect to the review questions and objectives, as well as potential implications and/or next steps.                                       | p. 16-17            |
| <b>FUNDING</b>                                |      |                                                                                                                                                                                                 |                     |
| Funding                                       | 22   | Describe sources of funding for the included sources of evidence, as well as sources of funding for the scoping review. Describe the role of the funders of the scoping review.                 | p. 18               |

JB1 = Joanna Briggs Institute; PRISMA-ScR = Preferred Reporting Items for Systematic reviews and Meta-Analyses extension for Scoping Reviews.

\* Where *sources of evidence* (see second footnote) are compiled from, such as bibliographic databases, social media platforms, and Web sites.

† A more inclusive/heterogeneous term used to account for the different types of evidence or data sources (e.g., quantitative and/or qualitative research, expert opinion, and policy documents) that may be eligible in a scoping review as opposed to only studies. This is not to be confused with *information sources* (see first footnote).

‡ The frameworks by Arksey and O'Malley (6) and Levac and colleagues (7) and the JBI guidance (4, 5) refer to the process of data extraction in a scoping review as data charting.

§ The process of systematically examining research evidence to assess its validity, results, and relevance before using it to inform a decision. This term is used for items 12 and 19 instead of "risk of bias" (which is more applicable to systematic reviews of interventions) to include and acknowledge the various sources of evidence that may be used in a scoping review (e.g., quantitative and/or qualitative research, expert opinion, and policy document).

From: Tricco AC, Lillie E, Zarin W, O'Brien KK, Colquhoun H, Levac D, et al. PRISMA Extension for Scoping Reviews (PRISMA-ScR): Checklist and Explanation. *Ann Intern Med.* ;169:467–473. doi: 10.7326/M18-0850

For peer review only

1  
2  
3  
4  
5  
6  
7  
8  
9  
10  
11  
12  
13  
14  
15  
16  
17  
18  
19  
20  
21  
22  
23  
24  
25  
26  
27  
28  
29  
30  
31  
32  
33  
34  
35  
36  
37  
38  
39  
40  
41  
42  
43  
44  
45  
46  
47  
48  
49  
50  
51  
52  
53  
54  
55  
56  
57  
58  
59  
60

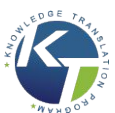

**St. Michael's**

Inspired Care.  
Inspiring Science.

For peer review only - <http://bmjopen.bmj.com/site/about/guidelines.xhtml>

# BMJ Open

## Intersectoral and integrated approaches in achieving the right to health for refugees upon resettlement: A scoping review

|                                 |                                                                                                                                                                                                                                                                                                                                                                                                                                                                                                                                                                                                                                                                                                                                                                                                                                                                |
|---------------------------------|----------------------------------------------------------------------------------------------------------------------------------------------------------------------------------------------------------------------------------------------------------------------------------------------------------------------------------------------------------------------------------------------------------------------------------------------------------------------------------------------------------------------------------------------------------------------------------------------------------------------------------------------------------------------------------------------------------------------------------------------------------------------------------------------------------------------------------------------------------------|
| Journal:                        | <i>BMJ Open</i>                                                                                                                                                                                                                                                                                                                                                                                                                                                                                                                                                                                                                                                                                                                                                                                                                                                |
| Manuscript ID                   | bmjopen-2019-029407.R1                                                                                                                                                                                                                                                                                                                                                                                                                                                                                                                                                                                                                                                                                                                                                                                                                                         |
| Article Type:                   | Research                                                                                                                                                                                                                                                                                                                                                                                                                                                                                                                                                                                                                                                                                                                                                                                                                                                       |
| Date Submitted by the Author:   | 19-Mar-2019                                                                                                                                                                                                                                                                                                                                                                                                                                                                                                                                                                                                                                                                                                                                                                                                                                                    |
| Complete List of Authors:       | Ho, Shirley; World Health Organization, Alliance for Health Policy and Systems Research<br>Javadi, Dena; World Health Organization, Alliance for Health Policy and Systems Research<br>Causevic, Sara; Royal Swedish Academy of Sciences, Swedish Institute for Global Health Transformation; Karolinska Institute, Global and Sexual Health, Department of Public Health Sciences<br>Langlois, Etienne V.; World Health Organization, Alliance for Health Policy and Systems Research<br>Friberg, Peter; Royal Swedish Academy of Sciences, Swedish Institute for Global Health Transformation; Sahlgrenska Academy, Institute of Medicine<br>Tomson, Göran ; Royal Swedish Academy of Sciences, Swedish Institute for Global Health Transformation; Karolinska Institute, Medical Management Centre, Department of Learning, Informatics, Management, Ethics |
| <b>Primary Subject Heading</b>: | Global health                                                                                                                                                                                                                                                                                                                                                                                                                                                                                                                                                                                                                                                                                                                                                                                                                                                  |
| Secondary Subject Heading:      | Health policy, Public health                                                                                                                                                                                                                                                                                                                                                                                                                                                                                                                                                                                                                                                                                                                                                                                                                                   |
| Keywords:                       | intersectoral, right to health, access, refugees, integration, resettlement                                                                                                                                                                                                                                                                                                                                                                                                                                                                                                                                                                                                                                                                                                                                                                                    |
|                                 |                                                                                                                                                                                                                                                                                                                                                                                                                                                                                                                                                                                                                                                                                                                                                                                                                                                                |

SCHOLARONE™  
Manuscripts



1  
2  
3 1 **Intersectoral and integrated approaches in achieving the right to health**  
4  
5 2 **for refugees upon resettlement: A scoping review**  
6  
7  
8 3  
9

10 4 Shirley Ho\*<sup>1</sup> email: shirley.ho@jhu.edu  
11 5 Dena Javadi <sup>1</sup> email: javadid@who.int  
12 6 Sara Causevic<sup>2,3</sup> email: sara.causevic@ki.se  
13 7 Etienne V. Langlois<sup>1</sup> email: langloise@who.int  
14 8 Peter Friberg<sup>2,5</sup> email: peter.friberg@mednet.gu.se  
15 9 Goran Tomson<sup>2,4</sup> email: goran.tomson@ki.se  
16  
17 10

18 11 <sup>1</sup> Alliance for Health Policy and Systems Research, World Health Organization, Avenue Appia 20, 1211 Geneva, Switzerland  
19 12

20 13 <sup>2</sup> Swedish Institute for Global Health Transformation, SIGHT, Royal Swedish Academy of Science, Stockholm, Sweden  
21 14

22 15 <sup>3</sup> Global and Sexual Health, Department of Public Health Sciences, Karolinska Institutet, Stockholm, Sweden

23 16 <sup>4</sup> Medical Management Centre, Department of Learning, Informatics, Management, Ethics (LIME), Karolinska Institutet, Stockholm, Sweden  
24 17

25 18 <sup>5</sup> Institute of Medicine, Sahlgrenska Academy at Gothenburg University and Sahlgrenska University Hospital  
26 19  
27 20  
28

29 21 **\*Corresponding Author:**

30 22 Shirley Ho, shirley.ho@jhu.edu

31 23 Alliance for Health Policy and Systems Research, World Health Organization  
32 24  
33  
34

35 25 **Keywords:** intersectoral, right to health, access, refugees, integration, resettlement  
36  
37 26  
38

39 27 Word count: 3,989  
40  
41  
42  
43  
44  
45  
46  
47  
48  
49  
50  
51  
52  
53  
54  
55  
56  
57  
58  
59  
60

1  
2  
3 28 **ABSTRACT (285/300)**  
4

5 29 **Background:** Better understanding, documentation, and evaluation of different refugee health  
6  
7 30 interventions, and their means of health system integration and intersectoral collaboration are needed  
8

9 31 **Objectives:** Explore the barriers and facilitators to the integration of health services for refugees; the  
10  
11 32 processes involved; and the different stakeholders engaged in leveraging intersectoral approaches to  
12  
13 33 protect refugees' right to health on resettlement

14 34 **Design:** Scoping review

15  
16 35 **Methods:** A search of articles from 2000 onward was done in MEDLINE, Web of Science, Global  
17  
18 36 Health, and PsycInfo Embase. Two frameworks were applied in our analysis, the "Framework for  
19  
20 37 analyzing integration of targeted health interventions in systems", and "Health in All Policies"  
21  
22 38 framework for country action. A comprehensive description of the methods is included in our  
23  
24 39 published protocol.

25 40 **Results:** 6,117 papers were identified, only 18 studies met the inclusion criteria. Facilitators in  
26  
27 41 implementation included: training for providers; colocation of services; transportation services to  
28  
29 42 enhance access; clear role definitions; and appropriate budget allocation and financing. Barriers  
30  
31 43 included: lack of a participatory approach; insufficient resources for providers; absence of  
32  
33 44 financing; unclear roles and insufficient coordination of interprofessional teams; low availability  
34  
35 45 and use of data; and turf wars across governance stakeholders. Successful strategies to address  
36  
37 46 refugee health included: networks of service delivery combining existing public and private  
38  
39 47 services; system navigators; host community engagement to reduce stigma; translation services;  
40  
41 48 legislative support; and alternative models of care for women and children.

42 49 **Conclusion:** Limited evidence was found overall. Further research on intersectoral approaches is  
43  
44 50 needed. Key policy insights gained from barriers and facilitators reported in available studies  
45  
46 51 include: improving coordination between existing programs; supporting colocation of services;  
47  
48 52 establishing formal system navigator roles that connect relevant programs; establishing formal  
49  
50 53 translation services to improve access; and establishing training and resources for providers.  
51  
52  
53  
54

55 55 **Registration:** Registered on Open Science Framework at <https://osf.io/gt9ck/>  
56  
57  
58  
59  
60

## 58 **Strengths and limitations of this study**

- 59 • Our study uses a systematic approach by using two frameworks, the “Framework for  
60 analyzing integration of targeted health interventions in systems”, and “Health in All  
61 Policies” framework for country action to develop a strong evidence base in  
62 understanding the processes and actors involved in integration and intersectoral action
- 63 • Our findings can be applied for policy and action aiming to enhance the integration of  
64 refugee health services within health systems, and identifying research needs to advance  
65 the right to health for refugees
- 66 • The lack of evidence on intersectoral and integrated approaches from low-income and  
67 middle-income countries may impact the generalizability of the findings

## 68 **INTRODUCTION**

69 Upholding the right to health is a fundamental challenge for governments worldwide,  
70 particularly when providing services to vulnerable or hard to reach populations such as refugees.  
71 The Office of the United Nations High Commission for Human Rights (OHCHR) identifies the  
72 right to health as a fundamental part of human rights, first articulated in the 1946 Constitution of  
73 the World Health Organization (WHO).<sup>1</sup> Entitlements under the right to health include universal  
74 health coverage – now a target under Sustainable Development Goal (SDG) 3 – broadly covering  
75 access to preventative and curative services, essential medicines, timely basic health services,  
76 health-related education, participation in health-related decision making at both national and  
77 community levels, as well as financial protection.<sup>1,2</sup> Especially relevant to the plight of refugees,  
78 the right to health includes non-discrimination whereby health services, commodities and  
79 facilities must be provided to all without any discrimination. Lastly, these health services must

1  
2  
3 80 be accessible, medically and culturally appropriate, available in adequate amount and quality,  
4  
5 81 which includes having a trained health workforce, safe products and sanitation.<sup>2</sup>  
6  
7

8 82 “Refugees” are individuals fleeing armed conflict or persecution as defined by the 1951  
9  
10 83 Refugee Convention which also identifies their basic rights, specifically that refugees should not  
11  
12 84 be returned to situations that are deemed a threat to their life or freedom.<sup>3</sup> A key distinction of  
13  
14 85 refugee rights is that they are not only a matter of national legislation, but also of international  
15  
16 86 law.<sup>4</sup> Despite these legal protections, refugees face many challenges in accessing health services,  
17  
18 87 especially more vulnerable groups like women and children.<sup>5</sup> Many states explicitly exclude  
19  
20 88 refugees from the level of protection afforded to their citizens, instead choosing to offer  
21  
22 89 “essential care” or “emergency health care,” which is differentially defined across countries.<sup>6</sup>  
23  
24 90 The Committee on the Elimination of Racial Discrimination, and the Committee on Economic,  
25  
26 91 Social and Cultural Rights, both include general statements that hold States accountable to “the  
27  
28 92 right of non-citizens to an adequate standard of physical and mental health by, inter alia,  
29  
30 93 refraining from denying or limiting their access to preventive, curative and palliative health  
31  
32 94 services”.<sup>7</sup> The increasing number of refugees over the past years makes the realization and  
33  
34 95 protection of these rights both a legal, ethical and a logistical challenge.<sup>5</sup> In addition, the  
35  
36 96 boundaries of the right to health have expanded due to increased understanding of social  
37  
38 97 determinants of health and the health impacts of the lived environment.<sup>8,9</sup> Refugees face  
39  
40 98 challenges in navigating health, legal, education, housing, social protection and employment  
41  
42 99 services, which further threatens their quality of life and health status.<sup>10</sup> Therefore, a lack of  
43  
44 100 coordination and integration across these services undermines their effectiveness.<sup>11</sup>  
45  
46  
47  
48  
49

50  
51 101 Much like the shift from the more vertical approaches of the millennium development  
52  
53 102 goals (MDGs) towards the more integrated SDGs, the protection of the right to health calls for an  
54  
55  
56  
57  
58  
59  
60

1  
2  
3 103 intersectoral approach whereby health is applied to all policies for all people.<sup>12</sup> As such, for  
4  
5 104 states to effectively protect the right to health for refugees there is a need to work across sectors  
6  
7  
8 105 and disciplines to better integrate targeted programs and initiatives, thereby improving standards  
9  
10 106 of care during resettlement. Some evidence exists that supporting collaboration and coordination  
11  
12 107 across social services for refugees improves the effectiveness and quality of care received.<sup>10</sup>  
13  
14 108 Many fragmented psychosocial programs exist across sectors to attempt to address the unique  
15  
16  
17 109 challenges faced by refugees but these are largely unevaluated and lack sustainability.<sup>13,14</sup> Better  
18  
19 110 understanding, documentation, evaluation and reporting of the dynamic nature of different  
20  
21 111 interventions, and their means of health system integration and intersectoral collaboration, are  
22  
23  
24 112 necessary to ensure that lessons learned are implemented in the design of future policies and  
25  
26 113 programs.

27  
28 114 Therefore, we conducted a scoping review that describes the barriers and facilitators to  
29  
30  
31 115 integrated health services for refugees; the process involved in protecting refugee health; and the  
32  
33 116 different stakeholders engaged in leveraging intersectoral approaches to protect refugees' right to  
34  
35 117 health on resettlement. We focused on three specific research questions:

- 36  
37  
38 118 (1) What are the barriers and facilitators in integrating targeted services for refugees within  
39  
40 119 existing health systems?  
41  
42 120 (2) What strategies are involved in addressing refugees' right to health upon resettlement?  
43  
44  
45 121 (3) Which stakeholders are involved in leveraging intersectoral approaches to protect  
46  
47 122 refugees' right to health?  
48

49 123

50  
51 124

52  
53  
54 125

## 126 **METHODS**

### 127 **Study Design**

128 We selected the scoping review method as we were interested in mapping the concepts relevant  
129 to the complex nature of this topic, the changing global landscape around it, and the emerging  
130 and diverse knowledge-base, which makes the method well-matched to our research  
131 objectives.<sup>15,16</sup> We drafted a scoping review protocol following the methods outlined by the  
132 Joanna Briggs Institute Methods Manual for scoping reviews.<sup>17</sup> Our protocol was registered with  
133 the Open Science Framework,<sup>18</sup> and published in BMJ Open.<sup>19</sup> Since our full methods are  
134 available in the published protocol, a summary is provided below.<sup>19</sup>

### 135 **Information Sources and Search Strategy**

136 A search of articles was done by two experienced librarians at the Karolinska Institutet using the  
137 following electronic databases: MEDLINE, Web of Science, Global Health, and PsycInfo  
138 Embase. See Appendix I for the comprehensive search strategy.

### 139 **Eligibility Criteria**

140 **Population:** Refugees as defined by the 1951 Refugee Convention<sup>3</sup>

141 **Intervention:** A program, approach or technical innovation that aims to protect refugees' right to  
142 health, including interventions aimed at addressing the social determinants of health.  
143 Interventions outside of the health sector that affect health were included.

144 **Comparators:** This component was not necessary as the focus was on gauging the state of  
145 evidence.

146 **Outcomes:** Eligible studies and papers include those discussing plans for action, strategies,  
147 barriers, facilitators or outcomes using an intersectoral approach.

1  
2  
3 148 **Types of Studies Included:** Randomized control trials, pre-post design evaluations, qualitative  
4  
5 149 evaluations, and economic evaluations were included. Further, implementation research and  
6  
7 150 operations research studies were eligible for inclusion, as well as studies or reports outlining  
8  
9 151 stakeholder experiences and plans.

10  
11  
12 152 **Exclusion Criteria:** Papers published in a language other than English were excluded. Other  
13  
14 153 categories of migrants were not included as their legal entitlements are different to those of  
15  
16 154 refugees which are protected under international law. If the studies did not display some level of  
17  
18 155 integration nor intersectorality, they were not assessed further.<sup>20</sup> Studies or commentaries that  
19  
20 156 solely discuss theories and conceptual models were excluded.

21  
22  
23 157 **Time Period:** Only studies from 2000 onward have been included.

24  
25  
26 158 **Setting:** Eligible studies are set in countries receiving refugees and asylum seekers (who may  
27  
28 159 eventually qualify for refugee status) and serving as hosts for resettlement.

## 30 31 160 **Frameworks to Address Research Questions**

32  
33  
34 161 Two published frameworks were used in our analysis to understand integration of health services  
35  
36 162 within health systems and to analyze intersectoral approaches to support these services. The first  
37  
38 163 framework by Atun et al (2010)<sup>21</sup>, is a tool for analyzing integration of targeted health  
39  
40 164 interventions in health systems, where integration is defined as “the extent, pattern, and rate of  
41  
42 165 adoption and eventual assimilation of health interventions into each of the critical functions of a  
43  
44 166 health system”.<sup>21</sup> The framework for integration was also used to assess the process, and actors  
45  
46 167 involved in integration.<sup>20</sup>

47  
48  
49  
50 168 The second framework applied in our analysis is that of the Health in All Policies (HiAP)  
51  
52 169 framework for country action. HiAP is defined as a way for countries to protect population  
53  
54 170 health through “an approach to public policies across sectors that systematically takes into

1  
2  
3 171 account the health implications of decisions, seeks synergies, and avoids harmful health impacts  
4  
5 172 in order to improve population health and health equity".<sup>22</sup> Components of this framework,  
6  
7 173 adapted to refugee needs, were used in the review to frame barriers and facilitators in integrating  
8  
9 174 refugee services through intersectoral collaboration.

### 12 175 **Data Abstraction**

14 176 A data abstraction chart was developed based on the two frameworks used in this study. The  
15  
16 177 chart was tested by two researchers and revised as appropriate. The revised chart was used by the  
17  
18 178 same researchers to abstract descriptive and qualitative data as relevant to the elements of the  
19  
20 179 frameworks used. Elements included in the chart were: intervention description; barriers and  
21  
22 180 facilitators; contextual details; target population; type of evaluation; outcomes; stakeholder  
23  
24 181 involvement in governance, financing, planning, service delivery, monitoring and evaluation,  
25  
26 182 and engagement. Deductive reasoning was used to identify barriers and facilitators in  
27  
28 183 intersectoral collaboration for refugee health. Open coding was applied to visualize themes  
29  
30 184 across interventions as well as barriers and facilitators.<sup>23</sup> Axial coding was applied to then draw  
31  
32 185 connections to enabling strategies for intersectoral collaboration.<sup>23</sup> General conclusions were  
33  
34 186 drawn based on these themes, leading to suggestions for strengthening programs and policies.

### 39 187 **Patient and Public Involvement**

40 188 There was no patient or public involvement required in conducting this scoping review.  
41  
42  
43  
44  
45 189  
46  
47 190  
48  
49 191  
50  
51 192  
52  
53  
54 193  
55  
56  
57  
58  
59  
60



## 194 RESULTS

195 Of the 6,117 records identified through the search strategy, 1302 abstracts were screened after  
 196 removing duplicates. 1141 were excluded based on exclusion criteria described above as  
 197 assessed by two independent reviewers, 131 full texts were assessed, with the references of 15  
 198 selected articles additionally screened for inclusion criteria, a total of 18 studies were included in  
 199 our review (see Figure 1). Five studies were programs or interventions carried out in the United  
 200 States of America (USA), one in Australia, two in Canada, one in Ethiopia and Uganda, and one  
 201 in each of the following: Italy, Lebanon, Mexico, the Netherlands, New Zealand, Spain and the  
 202 United Kingdom (UK) (See Table 1). Six studies were interventions at the district/local level,  
 203 four at a broader regional level and five at the national level. The interventions outlined in the  
 204 included studies addressed mostly all genders and all age ranges with the exception of six that  
 205 targeted vulnerable groups: two studies on mothers and children;<sup>24,25</sup> one on the elderly;<sup>26</sup> one on  
 206 students;<sup>27</sup> and two on women and girls.<sup>28,29</sup> Interventions targeting women and children in  
 207 particular used alternative models of care such as mobile health clinics,<sup>28,29</sup> and school-based  
 208 interventions.<sup>24,27</sup> Seven studies applied qualitative approaches (primarily in-depth interviews)  
 209 for evaluation,<sup>27–33</sup> four studies used survey tools or standardized assessment tools;<sup>25,26,34,35</sup> four  
 210 studies used descriptive and routine data;<sup>24,36–38</sup> and three studies were mainly descriptive  
 211 analysis reporting on and looking at the outcomes of case examples and policies.<sup>39–41</sup>

212 **Table 1. Summary of Included Studies**

| Author                    | Year | Title                                                                                                                                         | Intervention                                                                              | Barriers                                                                                                                | Facilitators                                                                                                                                                                                               | Country |
|---------------------------|------|-----------------------------------------------------------------------------------------------------------------------------------------------|-------------------------------------------------------------------------------------------|-------------------------------------------------------------------------------------------------------------------------|------------------------------------------------------------------------------------------------------------------------------------------------------------------------------------------------------------|---------|
| Calvo et al <sup>30</sup> | 2014 | The Effect of Universal Service Delivery on the Integration of Moroccan Immigrants in Spain: A Case Study from an Anti-Oppressive Perspective | Addressing stigma & host community perceptions; system navigator (intercultural mediator) | Minimal involvement of target community in design of program; considerations of forced assimilation through integration | Decreased prejudice due to increased contact between host and immigrant communities; clear communication to host community around allocation of resources thereby reducing perceived threat of competition | Spain   |

|    |                                   |      |                                                                                                           |                                                                                                                                                                                         |                                                                                                                                                 |                                                                                                                                                                                                                                                                                                                            |        |
|----|-----------------------------------|------|-----------------------------------------------------------------------------------------------------------|-----------------------------------------------------------------------------------------------------------------------------------------------------------------------------------------|-------------------------------------------------------------------------------------------------------------------------------------------------|----------------------------------------------------------------------------------------------------------------------------------------------------------------------------------------------------------------------------------------------------------------------------------------------------------------------------|--------|
| 1  |                                   |      |                                                                                                           |                                                                                                                                                                                         |                                                                                                                                                 |                                                                                                                                                                                                                                                                                                                            |        |
| 2  |                                   |      |                                                                                                           |                                                                                                                                                                                         |                                                                                                                                                 |                                                                                                                                                                                                                                                                                                                            |        |
| 3  | <b>Catarci<sup>34</sup></b>       | 2012 | Conceptions and Strategies for User Integration across Refugee Services in Italy                          | Integrated reception of refugees and asylum seekers (network of hospitals and health services, public employment services, vocational training and continuing education agencies, etc.) | Service coordinators lack tools to support integrated services; lack of continuity between theory and practice in continuing education support  | Service coordinators with access to continuing education were more likely to report adequate support; continuing education with intimate knowledge of the context, user needs, and legislation related to refugee inclusion; coordinators should also have a solid network and an ability to distinguish between resources | Italy  |
| 4  |                                   |      |                                                                                                           |                                                                                                                                                                                         |                                                                                                                                                 |                                                                                                                                                                                                                                                                                                                            |        |
| 5  |                                   |      |                                                                                                           |                                                                                                                                                                                         |                                                                                                                                                 |                                                                                                                                                                                                                                                                                                                            |        |
| 6  |                                   |      |                                                                                                           |                                                                                                                                                                                         |                                                                                                                                                 |                                                                                                                                                                                                                                                                                                                            |        |
| 7  |                                   |      |                                                                                                           |                                                                                                                                                                                         |                                                                                                                                                 |                                                                                                                                                                                                                                                                                                                            |        |
| 8  |                                   |      |                                                                                                           |                                                                                                                                                                                         |                                                                                                                                                 |                                                                                                                                                                                                                                                                                                                            |        |
| 9  |                                   |      |                                                                                                           |                                                                                                                                                                                         |                                                                                                                                                 |                                                                                                                                                                                                                                                                                                                            |        |
| 10 |                                   |      |                                                                                                           |                                                                                                                                                                                         |                                                                                                                                                 |                                                                                                                                                                                                                                                                                                                            |        |
| 11 |                                   |      |                                                                                                           |                                                                                                                                                                                         |                                                                                                                                                 |                                                                                                                                                                                                                                                                                                                            |        |
| 12 |                                   |      |                                                                                                           |                                                                                                                                                                                         |                                                                                                                                                 |                                                                                                                                                                                                                                                                                                                            |        |
| 13 |                                   |      |                                                                                                           |                                                                                                                                                                                         |                                                                                                                                                 |                                                                                                                                                                                                                                                                                                                            |        |
| 14 |                                   |      |                                                                                                           |                                                                                                                                                                                         |                                                                                                                                                 |                                                                                                                                                                                                                                                                                                                            |        |
| 15 |                                   |      |                                                                                                           |                                                                                                                                                                                         |                                                                                                                                                 |                                                                                                                                                                                                                                                                                                                            |        |
| 16 |                                   |      |                                                                                                           |                                                                                                                                                                                         |                                                                                                                                                 |                                                                                                                                                                                                                                                                                                                            |        |
| 17 | <b>Cowell et al<sup>25</sup></b>  | 2009 | Clinical Trail Outcomes of the Mexican American Problem Solving Program (MAPS)                            | A cognitively based problem solving program delivered on linked home visits to mothers and after school program classes to children                                                     | Difficulty managing case load by school nurse of home visits and classes                                                                        | Communication and engagement with the community; partnership with the school                                                                                                                                                                                                                                               | USA    |
| 18 |                                   |      |                                                                                                           |                                                                                                                                                                                         |                                                                                                                                                 |                                                                                                                                                                                                                                                                                                                            |        |
| 19 |                                   |      |                                                                                                           |                                                                                                                                                                                         |                                                                                                                                                 |                                                                                                                                                                                                                                                                                                                            |        |
| 20 |                                   |      |                                                                                                           |                                                                                                                                                                                         |                                                                                                                                                 |                                                                                                                                                                                                                                                                                                                            |        |
| 21 |                                   |      |                                                                                                           |                                                                                                                                                                                         |                                                                                                                                                 |                                                                                                                                                                                                                                                                                                                            |        |
| 22 |                                   |      |                                                                                                           |                                                                                                                                                                                         |                                                                                                                                                 |                                                                                                                                                                                                                                                                                                                            |        |
| 23 |                                   |      |                                                                                                           |                                                                                                                                                                                         |                                                                                                                                                 |                                                                                                                                                                                                                                                                                                                            |        |
| 24 |                                   |      |                                                                                                           |                                                                                                                                                                                         |                                                                                                                                                 |                                                                                                                                                                                                                                                                                                                            |        |
| 25 | <b>Geltman et al<sup>38</sup></b> | 2005 | A Private-Sector Preferred Provider Network Model for Public Health Screening of Newly Resettled Refugees | Public-private partnerships using a preferred provider network model for conducting refugee health screening                                                                            | Lack of appropriate funding model leading to delays in health screening                                                                         | Funding streams approved allowed procurement of services; network of providers created; dedicated training of physicians within the network                                                                                                                                                                                | USA    |
| 26 |                                   |      |                                                                                                           |                                                                                                                                                                                         |                                                                                                                                                 |                                                                                                                                                                                                                                                                                                                            |        |
| 27 |                                   |      |                                                                                                           |                                                                                                                                                                                         |                                                                                                                                                 |                                                                                                                                                                                                                                                                                                                            |        |
| 28 |                                   |      |                                                                                                           |                                                                                                                                                                                         |                                                                                                                                                 |                                                                                                                                                                                                                                                                                                                            |        |
| 29 |                                   |      |                                                                                                           |                                                                                                                                                                                         |                                                                                                                                                 |                                                                                                                                                                                                                                                                                                                            |        |
| 30 |                                   |      |                                                                                                           |                                                                                                                                                                                         |                                                                                                                                                 |                                                                                                                                                                                                                                                                                                                            |        |
| 31 |                                   |      |                                                                                                           |                                                                                                                                                                                         |                                                                                                                                                 |                                                                                                                                                                                                                                                                                                                            |        |
| 32 |                                   |      |                                                                                                           |                                                                                                                                                                                         |                                                                                                                                                 |                                                                                                                                                                                                                                                                                                                            |        |
| 33 | <b>Guruge et al<sup>29</sup></b>  | 2010 | Immigrant women's experiences of receiving care in a mobile health clinic                                 | Mobile health clinic for reproductive health services for immigrant women                                                                                                               | Lack of awareness of available services and navigating health systems; language barrier; fear of deportation leading to lack of use of services | Colocation of services due to the mobile nature of the clinic                                                                                                                                                                                                                                                              | Canada |
| 34 |                                   |      |                                                                                                           |                                                                                                                                                                                         |                                                                                                                                                 |                                                                                                                                                                                                                                                                                                                            |        |
| 35 |                                   |      |                                                                                                           |                                                                                                                                                                                         |                                                                                                                                                 |                                                                                                                                                                                                                                                                                                                            |        |
| 36 |                                   |      |                                                                                                           |                                                                                                                                                                                         |                                                                                                                                                 |                                                                                                                                                                                                                                                                                                                            |        |
| 37 |                                   |      |                                                                                                           |                                                                                                                                                                                         |                                                                                                                                                 |                                                                                                                                                                                                                                                                                                                            |        |
| 38 |                                   |      |                                                                                                           |                                                                                                                                                                                         |                                                                                                                                                 |                                                                                                                                                                                                                                                                                                                            |        |
| 39 |                                   |      |                                                                                                           |                                                                                                                                                                                         |                                                                                                                                                 |                                                                                                                                                                                                                                                                                                                            |        |
| 40 |                                   |      |                                                                                                           |                                                                                                                                                                                         |                                                                                                                                                 |                                                                                                                                                                                                                                                                                                                            |        |
| 41 | <b>Kim et al<sup>36</sup></b>     | 2002 | Primary health care for Korean immigrants: sustaining a culturally sensitive model                        | Translation support; integrated health and social care; mental health support; bilingual advanced nurse practitioner and community advocate serve as system navigators                  | Budgetary restrictions; existing restrictions in the roles that nurses can play in outreach                                                     | Effective communication around availability of new program; effective communication to announce new outreach and navigation role; efforts to build consensus and coherence across interprofessional teams; clear articulation of the role of advance nurse practitioners and their complementary role                      | USA    |
| 42 |                                   |      |                                                                                                           |                                                                                                                                                                                         |                                                                                                                                                 |                                                                                                                                                                                                                                                                                                                            |        |
| 43 |                                   |      |                                                                                                           |                                                                                                                                                                                         |                                                                                                                                                 |                                                                                                                                                                                                                                                                                                                            |        |
| 44 |                                   |      |                                                                                                           |                                                                                                                                                                                         |                                                                                                                                                 |                                                                                                                                                                                                                                                                                                                            |        |
| 45 |                                   |      |                                                                                                           |                                                                                                                                                                                         |                                                                                                                                                 |                                                                                                                                                                                                                                                                                                                            |        |
| 46 |                                   |      |                                                                                                           |                                                                                                                                                                                         |                                                                                                                                                 |                                                                                                                                                                                                                                                                                                                            |        |
| 47 |                                   |      |                                                                                                           |                                                                                                                                                                                         |                                                                                                                                                 |                                                                                                                                                                                                                                                                                                                            |        |
| 48 |                                   |      |                                                                                                           |                                                                                                                                                                                         |                                                                                                                                                 |                                                                                                                                                                                                                                                                                                                            |        |
| 49 |                                   |      |                                                                                                           |                                                                                                                                                                                         |                                                                                                                                                 |                                                                                                                                                                                                                                                                                                                            |        |
| 50 |                                   |      |                                                                                                           |                                                                                                                                                                                         |                                                                                                                                                 |                                                                                                                                                                                                                                                                                                                            |        |
| 51 |                                   |      |                                                                                                           |                                                                                                                                                                                         |                                                                                                                                                 |                                                                                                                                                                                                                                                                                                                            |        |
| 52 |                                   |      |                                                                                                           |                                                                                                                                                                                         |                                                                                                                                                 |                                                                                                                                                                                                                                                                                                                            |        |
| 53 |                                   |      |                                                                                                           |                                                                                                                                                                                         |                                                                                                                                                 |                                                                                                                                                                                                                                                                                                                            |        |
| 54 |                                   |      |                                                                                                           |                                                                                                                                                                                         |                                                                                                                                                 |                                                                                                                                                                                                                                                                                                                            |        |
| 55 |                                   |      |                                                                                                           |                                                                                                                                                                                         |                                                                                                                                                 |                                                                                                                                                                                                                                                                                                                            |        |
| 56 |                                   |      |                                                                                                           |                                                                                                                                                                                         |                                                                                                                                                 |                                                                                                                                                                                                                                                                                                                            |        |
| 57 |                                   |      |                                                                                                           |                                                                                                                                                                                         |                                                                                                                                                 |                                                                                                                                                                                                                                                                                                                            |        |
| 58 |                                   |      |                                                                                                           |                                                                                                                                                                                         |                                                                                                                                                 |                                                                                                                                                                                                                                                                                                                            |        |
| 59 |                                   |      |                                                                                                           |                                                                                                                                                                                         |                                                                                                                                                 |                                                                                                                                                                                                                                                                                                                            |        |
| 60 |                                   |      |                                                                                                           |                                                                                                                                                                                         |                                                                                                                                                 |                                                                                                                                                                                                                                                                                                                            |        |

1  
2  
3  
4  
5  
6  
7  
8  
9  
10  
11  
12  
13  
14  
15  
16  
17  
18  
19  
20  
21  
22  
23  
24  
25  
26  
27  
28  
29  
30  
31  
32  
33  
34  
35  
36  
37  
38  
39  
40  
41  
42  
43  
44  
45  
46  
47  
48  
49  
50  
51  
52  
53  
54  
55  
56  
57  
58  
59  
60

|                                      |      |                                                                                                                                     |                                                                                                                                                                                                                                                       |                                                                                                                                                                                                                                                                  |                                                                                                                                                                                                                       |             |
|--------------------------------------|------|-------------------------------------------------------------------------------------------------------------------------------------|-------------------------------------------------------------------------------------------------------------------------------------------------------------------------------------------------------------------------------------------------------|------------------------------------------------------------------------------------------------------------------------------------------------------------------------------------------------------------------------------------------------------------------|-----------------------------------------------------------------------------------------------------------------------------------------------------------------------------------------------------------------------|-------------|
| <b>Lilleston et al<sup>28</sup></b>  | 2018 | Evaluation of a mobile approach to gender-based violence service delivery among Syrian refugees in Lebanon                          | GBV mobile support service, providing safe spaces, community outreach, psychosocial support activities, safe legal and medical referrals, survivor-approach, adherence to confidentiality, and access to face-to-face and phone-based case management | Trust-building is a key element and so constant mobility of target audience presented a challenge as did referral of services as quality medical and legal services were not always safe or available                                                            | Integration of legal and medical teams in mobile GBV support teams; community mobilizers/system navigator role is a key function                                                                                      | Lebanon     |
| <b>Macfarlane et al<sup>33</sup></b> | 2009 | Language barriers in health and social care consultations in the community: A comparative study of responses in Ireland and England | Translation support                                                                                                                                                                                                                                   | Use of unpaid interpreters from patients' social networks is complex; only one accredited course for professional interpreters; use of professional interpreters patchy due to low quality and institutional challenges in their acquisition                     | In England where there is a policy to use language services (Race Equality Policy), there is more use than in Ireland but implementation remains poor                                                                 | UK          |
| <b>McMurray et al<sup>35</sup></b>   | 2014 | Integrated Primary Care Improves Access to Healthcare for Newly Arrived Refugees in Canada                                          | Translation support; integrated health and social care; Gateway services and system navigators                                                                                                                                                        | Shortage of primary care physicians which is the gateway; bureaucracy when billing Canada's Interim Federal Health Program (IFHP) that provides coverage for health care costs until provincial health insurance is available                                    | Relationships between local physician community and case workers (navigators); timely transfer of records; ongoing consultations post-transfer                                                                        | Canada      |
| <b>McNaughton et al<sup>24</sup></b> | 2010 | Directions for Refining a School Nursing Intervention for Mexican Immigrant Families                                                | Active case finding and problem solving through education system (school nurses); translation support                                                                                                                                                 | Schools with no existing nursing outreach program were difficult to start at                                                                                                                                                                                     | Nursing role was recognized and accepted by immigrant communities; schools that had a nursing program already could expand it to active case finding with immigrant families                                          | Mexico      |
| <b>Mortensen<sup>31</sup></b>        | 2011 | Public Health System Responsiveness To Refugee Groups In New Zealand: Activation From The Bottom Up                                 | Physician-driven needs-based programs in primary care                                                                                                                                                                                                 | Mismatch between policies at national vs. local level; lack of demographic data; no long-term planning or projected needs; low linkages between district health branch, public health offices, and NGOs; low health literacy due to lack of translated materials | Quota refugees have same access to services as host communities; local action activated by physicians and community leaders led to more coverage and higher quality services in specific areas that had more advocacy | New Zealand |

|    |                                     |      |                                                                                                                                                                               |                                                                                                                                                            |                                                                                                                                                                                                                                                                                                                                                                            |                                                                                                                                                              |                   |
|----|-------------------------------------|------|-------------------------------------------------------------------------------------------------------------------------------------------------------------------------------|------------------------------------------------------------------------------------------------------------------------------------------------------------|----------------------------------------------------------------------------------------------------------------------------------------------------------------------------------------------------------------------------------------------------------------------------------------------------------------------------------------------------------------------------|--------------------------------------------------------------------------------------------------------------------------------------------------------------|-------------------|
| 1  |                                     |      |                                                                                                                                                                               |                                                                                                                                                            |                                                                                                                                                                                                                                                                                                                                                                            |                                                                                                                                                              |                   |
| 2  |                                     |      |                                                                                                                                                                               |                                                                                                                                                            |                                                                                                                                                                                                                                                                                                                                                                            |                                                                                                                                                              |                   |
| 3  | <b>Philbin et al</b> <sup>40</sup>  | 2018 | State-level immigration and immigrant-focused policies as drivers of Latino health disparities in the United States                                                           | Policies to address social and legal determinants of health as they relate to immigrant populations                                                        | Exclusionary policies affect social determinants of health, especially in mixed status families; families unwilling to participate in social programs due to fear and confusion over entitlements; structural racism; restrictions in accessing education and employment; low mobility and relocation to remote areas with low availability of integrated social services. | Elimination of waiting period in several states for access to Medicaid regardless of immigration status; extra funding to federally qualified health centres | USA               |
| 4  |                                     |      |                                                                                                                                                                               |                                                                                                                                                            |                                                                                                                                                                                                                                                                                                                                                                            |                                                                                                                                                              |                   |
| 5  |                                     |      |                                                                                                                                                                               |                                                                                                                                                            |                                                                                                                                                                                                                                                                                                                                                                            |                                                                                                                                                              |                   |
| 6  |                                     |      |                                                                                                                                                                               |                                                                                                                                                            |                                                                                                                                                                                                                                                                                                                                                                            |                                                                                                                                                              |                   |
| 7  |                                     |      |                                                                                                                                                                               |                                                                                                                                                            |                                                                                                                                                                                                                                                                                                                                                                            |                                                                                                                                                              |                   |
| 8  |                                     |      |                                                                                                                                                                               |                                                                                                                                                            |                                                                                                                                                                                                                                                                                                                                                                            |                                                                                                                                                              |                   |
| 9  |                                     |      |                                                                                                                                                                               |                                                                                                                                                            |                                                                                                                                                                                                                                                                                                                                                                            |                                                                                                                                                              |                   |
| 10 |                                     |      |                                                                                                                                                                               |                                                                                                                                                            |                                                                                                                                                                                                                                                                                                                                                                            |                                                                                                                                                              |                   |
| 11 |                                     |      |                                                                                                                                                                               |                                                                                                                                                            |                                                                                                                                                                                                                                                                                                                                                                            |                                                                                                                                                              |                   |
| 12 |                                     |      |                                                                                                                                                                               |                                                                                                                                                            |                                                                                                                                                                                                                                                                                                                                                                            |                                                                                                                                                              |                   |
| 13 |                                     |      |                                                                                                                                                                               |                                                                                                                                                            |                                                                                                                                                                                                                                                                                                                                                                            |                                                                                                                                                              |                   |
| 14 |                                     |      |                                                                                                                                                                               |                                                                                                                                                            |                                                                                                                                                                                                                                                                                                                                                                            |                                                                                                                                                              |                   |
| 15 |                                     |      |                                                                                                                                                                               |                                                                                                                                                            |                                                                                                                                                                                                                                                                                                                                                                            |                                                                                                                                                              |                   |
| 16 |                                     |      |                                                                                                                                                                               |                                                                                                                                                            |                                                                                                                                                                                                                                                                                                                                                                            |                                                                                                                                                              |                   |
| 17 |                                     |      |                                                                                                                                                                               |                                                                                                                                                            |                                                                                                                                                                                                                                                                                                                                                                            |                                                                                                                                                              |                   |
| 18 |                                     |      |                                                                                                                                                                               |                                                                                                                                                            |                                                                                                                                                                                                                                                                                                                                                                            |                                                                                                                                                              |                   |
| 19 | <b>Stewart et al</b> <sup>32</sup>  | 2008 | Multicultural Meanings of Social Support among Immigrants and Refugees                                                                                                        | Policies to address social and legal determinants of health as they relate to immigrant populations; social networking                                     | Inadequate financial and human resources, limited agency mandates, ineffective collaboration with other sectors, and low staff morale; collaboration impeded by the volume of organizations involved                                                                                                                                                                       | Existing networks of longer term immigrants were supportive in overcoming access barriers                                                                    | Canada            |
| 20 |                                     |      |                                                                                                                                                                               |                                                                                                                                                            |                                                                                                                                                                                                                                                                                                                                                                            |                                                                                                                                                              |                   |
| 21 |                                     |      |                                                                                                                                                                               |                                                                                                                                                            |                                                                                                                                                                                                                                                                                                                                                                            |                                                                                                                                                              |                   |
| 22 |                                     |      |                                                                                                                                                                               |                                                                                                                                                            |                                                                                                                                                                                                                                                                                                                                                                            |                                                                                                                                                              |                   |
| 23 |                                     |      |                                                                                                                                                                               |                                                                                                                                                            |                                                                                                                                                                                                                                                                                                                                                                            |                                                                                                                                                              |                   |
| 24 |                                     |      |                                                                                                                                                                               |                                                                                                                                                            |                                                                                                                                                                                                                                                                                                                                                                            |                                                                                                                                                              |                   |
| 25 |                                     |      |                                                                                                                                                                               |                                                                                                                                                            |                                                                                                                                                                                                                                                                                                                                                                            |                                                                                                                                                              |                   |
| 26 |                                     |      |                                                                                                                                                                               |                                                                                                                                                            |                                                                                                                                                                                                                                                                                                                                                                            |                                                                                                                                                              |                   |
| 27 |                                     |      |                                                                                                                                                                               |                                                                                                                                                            |                                                                                                                                                                                                                                                                                                                                                                            |                                                                                                                                                              |                   |
| 28 |                                     |      |                                                                                                                                                                               |                                                                                                                                                            |                                                                                                                                                                                                                                                                                                                                                                            |                                                                                                                                                              |                   |
| 29 | <b>Tuepker et al</b> <sup>41</sup>  | 2009 | Evaluating integrated healthcare for refugees and hosts in an African context                                                                                                 | Integrating host and refugee healthcare by reorganizing ministries to incorporate refugee services into existing portfolios rather than under one ministry | Lack of evidence on the added value of integrated care; concern around minimizing exceptional status of refugees; no legal obligation to provide integrated care; turf wars across organizations and sectors                                                                                                                                                               | Funding streams from international organizations to national health services                                                                                 | Ethiopia & Uganda |
| 30 |                                     |      |                                                                                                                                                                               |                                                                                                                                                            |                                                                                                                                                                                                                                                                                                                                                                            |                                                                                                                                                              |                   |
| 31 |                                     |      |                                                                                                                                                                               |                                                                                                                                                            |                                                                                                                                                                                                                                                                                                                                                                            |                                                                                                                                                              |                   |
| 32 |                                     |      |                                                                                                                                                                               |                                                                                                                                                            |                                                                                                                                                                                                                                                                                                                                                                            |                                                                                                                                                              |                   |
| 33 |                                     |      |                                                                                                                                                                               |                                                                                                                                                            |                                                                                                                                                                                                                                                                                                                                                                            |                                                                                                                                                              |                   |
| 34 |                                     |      |                                                                                                                                                                               |                                                                                                                                                            |                                                                                                                                                                                                                                                                                                                                                                            |                                                                                                                                                              |                   |
| 35 |                                     |      |                                                                                                                                                                               |                                                                                                                                                            |                                                                                                                                                                                                                                                                                                                                                                            |                                                                                                                                                              |                   |
| 36 |                                     |      |                                                                                                                                                                               |                                                                                                                                                            |                                                                                                                                                                                                                                                                                                                                                                            |                                                                                                                                                              |                   |
| 37 |                                     |      |                                                                                                                                                                               |                                                                                                                                                            |                                                                                                                                                                                                                                                                                                                                                                            |                                                                                                                                                              |                   |
| 38 |                                     |      |                                                                                                                                                                               |                                                                                                                                                            |                                                                                                                                                                                                                                                                                                                                                                            |                                                                                                                                                              |                   |
| 39 |                                     |      |                                                                                                                                                                               |                                                                                                                                                            |                                                                                                                                                                                                                                                                                                                                                                            |                                                                                                                                                              |                   |
| 40 | <b>Verhagen et al</b> <sup>26</sup> | 2013 | Culturally sensitive care for elderly immigrants through ethnic community health workers: design and development of a community based intervention program in the Netherlands | Use of ethnically similar CHWs to deliver health and social care; active case finding; community-driven problem solving with oversight by CHWs             | Lack of participation by target community in culturally-sensitive design; limited knowledge by target community around availability of services                                                                                                                                                                                                                            | Use of ethnically-similar CHWs                                                                                                                               | Netherlands       |
| 41 |                                     |      |                                                                                                                                                                               |                                                                                                                                                            |                                                                                                                                                                                                                                                                                                                                                                            |                                                                                                                                                              |                   |
| 42 |                                     |      |                                                                                                                                                                               |                                                                                                                                                            |                                                                                                                                                                                                                                                                                                                                                                            |                                                                                                                                                              |                   |
| 43 |                                     |      |                                                                                                                                                                               |                                                                                                                                                            |                                                                                                                                                                                                                                                                                                                                                                            |                                                                                                                                                              |                   |
| 44 |                                     |      |                                                                                                                                                                               |                                                                                                                                                            |                                                                                                                                                                                                                                                                                                                                                                            |                                                                                                                                                              |                   |
| 45 |                                     |      |                                                                                                                                                                               |                                                                                                                                                            |                                                                                                                                                                                                                                                                                                                                                                            |                                                                                                                                                              |                   |
| 46 |                                     |      |                                                                                                                                                                               |                                                                                                                                                            |                                                                                                                                                                                                                                                                                                                                                                            |                                                                                                                                                              |                   |
| 47 |                                     |      |                                                                                                                                                                               |                                                                                                                                                            |                                                                                                                                                                                                                                                                                                                                                                            |                                                                                                                                                              |                   |
| 48 |                                     |      |                                                                                                                                                                               |                                                                                                                                                            |                                                                                                                                                                                                                                                                                                                                                                            |                                                                                                                                                              |                   |
| 49 |                                     |      |                                                                                                                                                                               |                                                                                                                                                            |                                                                                                                                                                                                                                                                                                                                                                            |                                                                                                                                                              |                   |
| 50 | <b>Woodland et al</b> <sup>27</sup> | 2016 | Evaluation of a school screening program for young people from refugee backgrounds                                                                                            | Active case finding and problem solving through education system (school nurses); translation support                                                      | Poor integration of multiple service providers; lack of funding                                                                                                                                                                                                                                                                                                            | Integration within the school; informal communication between clinicians and the school                                                                      | Australia         |
| 51 |                                     |      |                                                                                                                                                                               |                                                                                                                                                            |                                                                                                                                                                                                                                                                                                                                                                            |                                                                                                                                                              |                   |
| 52 |                                     |      |                                                                                                                                                                               |                                                                                                                                                            |                                                                                                                                                                                                                                                                                                                                                                            |                                                                                                                                                              |                   |
| 53 |                                     |      |                                                                                                                                                                               |                                                                                                                                                            |                                                                                                                                                                                                                                                                                                                                                                            |                                                                                                                                                              |                   |
| 54 |                                     |      |                                                                                                                                                                               |                                                                                                                                                            |                                                                                                                                                                                                                                                                                                                                                                            |                                                                                                                                                              |                   |
| 55 |                                     |      |                                                                                                                                                                               |                                                                                                                                                            |                                                                                                                                                                                                                                                                                                                                                                            |                                                                                                                                                              |                   |
| 56 |                                     |      |                                                                                                                                                                               |                                                                                                                                                            |                                                                                                                                                                                                                                                                                                                                                                            |                                                                                                                                                              |                   |
| 57 |                                     |      |                                                                                                                                                                               |                                                                                                                                                            |                                                                                                                                                                                                                                                                                                                                                                            |                                                                                                                                                              |                   |
| 58 |                                     |      |                                                                                                                                                                               |                                                                                                                                                            |                                                                                                                                                                                                                                                                                                                                                                            |                                                                                                                                                              |                   |
| 59 |                                     |      |                                                                                                                                                                               |                                                                                                                                                            |                                                                                                                                                                                                                                                                                                                                                                            |                                                                                                                                                              |                   |
| 60 |                                     |      |                                                                                                                                                                               |                                                                                                                                                            |                                                                                                                                                                                                                                                                                                                                                                            |                                                                                                                                                              |                   |

|    |                                    |      |                                                                                                                  |                                                                                                                                                                                                                                                                                                                                     |                                                                                                                                                                                                        |                                                                                                                                                                                                                                                                                                                                                                                                                                                                                   |           |
|----|------------------------------------|------|------------------------------------------------------------------------------------------------------------------|-------------------------------------------------------------------------------------------------------------------------------------------------------------------------------------------------------------------------------------------------------------------------------------------------------------------------------------|--------------------------------------------------------------------------------------------------------------------------------------------------------------------------------------------------------|-----------------------------------------------------------------------------------------------------------------------------------------------------------------------------------------------------------------------------------------------------------------------------------------------------------------------------------------------------------------------------------------------------------------------------------------------------------------------------------|-----------|
| 3  | <b>Woodland et al<sup>39</sup></b> | 2010 | Health service delivery for newly arrived refugee children: A framework for good practice                        | Comprehensive, screening services; partnerships between community and health services (refugee health nurse as system navigator); transportation services to access centres; specific training provided to physicians and other care providers, including referral pathways; Pharmaceutical benefit scheme addressing refugee needs | Lack of coordinated policy for all categories of refugees and asylum seekers; administrative burden of PHC coordination; lack of information for managing conditions specific or prominent to refugees | Family-based services (colocation to address family needs); refugee health nurses (system navigators) decrease administrative burden of coordination; consumer participation and consultation; colocation of screening services ; transportation support for getting to services; strong health information systems; data and consultations used to inform the direction of intersectoral collaboration and nature of partnerships between health and community service providers | Australia |
| 23 | <b>Yeung et al<sup>37</sup></b>    | 2004 | Integrating psychiatry and primary care improves acceptability to mental health services among Chinese Americans | Specific training provided to physicians and other care providers; mental health support (colocation of mental health services); primary care nurse as a bridge/ system navigator for referrals;                                                                                                                                    | Funding for coordination outside purview of essential services; lack of knowledge on culturally-appropriate mental health services                                                                     | Co-location of primary care and mental health services; designated staff as the bridge; training of service providers                                                                                                                                                                                                                                                                                                                                                             | USA       |

213

214 To respond to research question 1, each of the interventions and summarized barriers and  
 215 facilitators are described in Table 1 and grouped by common themes in Table 2. Findings are  
 216 summarized in this section. Common facilitators identified in programs and approaches to  
 217 protect refugee health through intersectoral approaches and integration of services include:  
 218 strong communication of program availability, tools and training for providers, colocation of  
 219 services, transportation services to enhance access, clear role definitions, interprofessional team  
 220 and relationship management across providers, appropriate allocation of budget and financing,  
 221 and coordinated refugee-specific policies.

222 Barriers articulated include: lack of a participatory approach, poor communication  
 223 leading to stigma and underuse of services, insufficient resources given to providers, absence of

224 financing, unclear roles and insufficient coordination of interprofessional teams, exclusionary  
 225 refugee policies, low availability and use of data, and turf wars across governance stakeholders.  
 226 Table 2 highlights the studies that expand on these themes as barriers or facilitators.

227 **Table 2. Barriers & Facilitators Commonly Discussed Across Studies**

| Elements                                                            | Element present as barrier                                                                                                                     | Element present as facilitator                                                                                           |
|---------------------------------------------------------------------|------------------------------------------------------------------------------------------------------------------------------------------------|--------------------------------------------------------------------------------------------------------------------------|
| Community engagement                                                | Calvo et al; <sup>30</sup> Verhagen et al <sup>26</sup>                                                                                        | Kim et al; <sup>36</sup> Mortensen; <sup>31</sup> McMurray et al; <sup>35</sup> Cowell et al <sup>25</sup>               |
| Communication between host and refugee communities                  |                                                                                                                                                | Calvo et al; <sup>30</sup> Woodland et al, 2016 <sup>27</sup>                                                            |
| Tools/Training for service providers to support integrated services | Catarci; <sup>34</sup> MacFarlane et al; <sup>33</sup> Woodland et al, 2010 <sup>39</sup>                                                      | Woodland et al, 2010; <sup>39</sup> Yeung et al; <sup>37</sup> Geltman et al <sup>38</sup>                               |
| Colocation of services                                              |                                                                                                                                                | Woodland et al, 2010; <sup>39</sup> Yeung et al; <sup>37</sup> Lilleston et al; <sup>28</sup> Guruge et al <sup>29</sup> |
| Transportation                                                      |                                                                                                                                                | Woodland et al, 2010 <sup>39</sup>                                                                                       |
| Networks between providers                                          |                                                                                                                                                | Catarci; <sup>34</sup> Stewart et al; <sup>32</sup> Geltman et al <sup>38</sup>                                          |
| Budget/Appropriate funding streams                                  | Kim et al; <sup>36</sup> McMurray et al; <sup>35</sup> Stewart et al <sup>32</sup>                                                             | Philbin; <sup>40</sup> Tuepker et al; <sup>41</sup> Geltman et al <sup>38</sup>                                          |
| Role definitions                                                    | Kim et al <sup>36</sup>                                                                                                                        | McNaughton et al; <sup>24</sup> Lilleston et al; <sup>28</sup> Yeung et al <sup>37</sup>                                 |
| Interprofessional team management                                   | Stewart et al; <sup>32</sup> Woodland et al, 2016 <sup>27</sup>                                                                                | Kim et al <sup>36</sup>                                                                                                  |
| Refugee-specific policies                                           | Mortensen; <sup>31</sup> Philbin; <sup>40</sup> Tuepker et al; <sup>41</sup> Woodland et al, 2010; <sup>39</sup> Lilleston et al <sup>28</sup> | MacFarlane et al; <sup>33</sup> Philbin <sup>40</sup>                                                                    |
| Data                                                                | Mortensen; <sup>31</sup> Tuepker et al <sup>41</sup>                                                                                           |                                                                                                                          |
| Organizational turf                                                 | Stewart et al; <sup>32</sup> Tuepker et al <sup>41</sup>                                                                                       |                                                                                                                          |

228  
 229 To respond to research question 2, this section will summarize common themes identified  
 230 as enabling strategies that support intersectoral collaboration to promote refugee health.  
 231 Strategies identified in this review include: establishing networks of service delivery through a  
 232 combination of existing public and private services, establishing a system navigator role,  
 233 engaging host communities to reduce stigma, ensuring availability of translation services,  
 234 outreach, and advocacy and legislative support. Table 3 highlights the studies that address each  
 235 of these strategies. In Italy for example, networks were promoted among private and public

1  
2  
3 236 authorities and service providers, including health, employment, vocational training and  
4  
5 237 continuing education services.<sup>34</sup> In this model, users moved through the pathways of integration  
6  
7 238 and can receive support for any combination of health needs, access to education, housing  
8  
9 239 support, and legal assistance.<sup>34</sup> Collaborative design and delivery of services was also  
10  
11 240 demonstrated in Australia with support from multidisciplinary, intersectoral teams, but a lack of  
12  
13 241 funding presented barriers to the potential success of this initiative.<sup>27</sup> Similarly in the USA, the  
14  
15 242 “Bridge Project” faced insufficient funding in the coordination of care despite seeing promising  
16  
17 243 results from use of a system navigator – or primary care nurse “bridge” – to connect primary care  
18  
19 244 and mental health care services.<sup>37</sup> A network of “gateway services” was also tested in Canada  
20  
21 245 using a “Reception House” model.<sup>35</sup> These services are characterized by being person-centred,  
22  
23 246 interprofessional, communication-focused, and comprehensive across the continuum of care.<sup>35</sup>  
24  
25 247 Relationship-management between the Reception House, health professionals, translation  
26  
27 248 services, and social services was acknowledge as a key component for success.<sup>35</sup> Input from  
28  
29 249 international medical graduates in training also supported this work by enhancing culturally  
30  
31 250 appropriate service delivery by this network of partners.<sup>35</sup>

32  
33 251 Striking a balance between providing tailored, culturally-appropriate care and integrating  
34  
35 252 health and social services for refugees into existing services in the host community can be  
36  
37 253 especially challenging. Policy reviews suggest that taking a “one-policy, one-level, one-  
38  
39 254 outcome” approach or focusing refugee management under one ministry is not sufficient in  
40  
41 255 addressing the wide range of obstacles that both host and refugee communities are facing as a  
42  
43 256 result of the current political climate.<sup>40,41</sup> The Ethiopian government for example had success in  
44  
45 257 reorganizing ministries to incorporate refugee management into existing portfolios rather than a  
46  
47  
48  
49  
50  
51  
52  
53  
54  
55  
56  
57  
58  
59  
60

258 refugee-specific one, moving refugee assistance programs out of camps and promoting more  
 259 collaboration across government and non-governmental programs.<sup>41</sup>

260 **Table 3. Enabling Strategies Present Across Studies**

| Strategy                                                                   | Studies                        |                                |                                    |                                    |                                    |                               |                            |
|----------------------------------------------------------------------------|--------------------------------|--------------------------------|------------------------------------|------------------------------------|------------------------------------|-------------------------------|----------------------------|
| Host community engagement                                                  | Calvo et al <sup>30</sup>      |                                |                                    |                                    |                                    |                               |                            |
| System navigation                                                          | Calvo et al <sup>30</sup>      | Kim et al <sup>36</sup>        | McMurray et al <sup>35</sup>       | Woodland et al, 2010 <sup>39</sup> | Yeung et al <sup>37</sup>          | Lilleston et al <sup>28</sup> |                            |
| Integrated health and social services through networked approach           | Catarci <sup>34</sup>          | Kim et al <sup>36</sup>        | McMurray et al <sup>35</sup>       | Yeung et al <sup>37</sup>          |                                    |                               |                            |
| Translation support                                                        | Kim et al <sup>36</sup>        | MacFarlane et al <sup>33</sup> | McMurray et al <sup>35</sup>       | McNaughton et al <sup>24</sup>     | Woodland et al, 2016 <sup>27</sup> | Cowell et al <sup>25</sup>    | Guruge et al <sup>29</sup> |
| Active case finding/Outreach                                               | McNaughton et al <sup>24</sup> | Verhagen et al <sup>26</sup>   | Woodland et al, 2016 <sup>27</sup> | Guruge et al <sup>29</sup>         |                                    |                               |                            |
| Refugee-specific service delivery and access to health and social networks | Mortensen <sup>31</sup>        | Philbin et al <sup>40</sup>    | Stewart et al <sup>32</sup>        | Verhagen et al <sup>26</sup>       |                                    |                               |                            |
| Legislative support                                                        | Philbin et al <sup>40</sup>    | Tuepker et al <sup>41</sup>    | Woodland et al, 2010 <sup>39</sup> | Geltman et al <sup>38</sup>        |                                    |                               |                            |
| Changes in funding modalities                                              | Tuepker et al <sup>41</sup>    |                                |                                    |                                    |                                    |                               |                            |

261  
 262 In terms of stakeholders involved (research question 3) in implementing, monitoring or  
 263 facilitating the aforementioned strategies, studies did not always report on the parties involved in  
 264 governance, financing, planning, service delivery, monitoring and evaluation or demand  
 265 generation (elements drawn from the integration framework by Atun et al (2010)<sup>21</sup>). Where they  
 266 were mentioned, stakeholders responsible for the governance of interventions addressing refugee  
 267 health were comprised of primary care centres,<sup>35,37</sup> municipal governments,<sup>30,38</sup> departments of  
 268 social services and/or public health,<sup>30,36</sup> central services responsible for coordination of refugee  
 269 services and provision of assistance to local services,<sup>34,35</sup> national governments,<sup>31,32</sup> and  
 270 international bodies.<sup>28</sup> Stakeholders responsible for health financing consisted of individual



271 fundraising by service providers,<sup>31,33</sup> government,<sup>30,31,35,38,41</sup> and international bodies or  
272 donors.<sup>28,36,37,41</sup> Program and policy planning stakeholders encompassed national  
273 governments,<sup>31,38,41</sup> departments of social services and/or public health,<sup>27,30,36</sup> central services  
274 responsible for coordination of refugee services and provision of assistance to local  
275 services,<sup>29,34,35</sup> researchers,<sup>24,26,30,36,37</sup> service providers,<sup>27,28,35,37</sup> and international bodies or  
276 donors.<sup>28,36,41</sup> Service delivery stakeholders included national departments of social services  
277 and/or public health,<sup>27,30,33,36,38-41</sup> networks of local service providers in health, education,  
278 socialization, translation and/or employment,<sup>24,31,34,36</sup> healthcare providers,<sup>27,33,35,37,38</sup> central  
279 services responsible for coordination of refugee services and provision of assistance to local  
280 services,<sup>32,34,35</sup> community health workers,<sup>26</sup> and international bodies.<sup>28,41</sup> Stakeholders  
281 responsible for monitoring and evaluation were seldom explicitly mentioned. For demand  
282 generation, stakeholders included central services responsible for the coordination of refugee  
283 services and provision of assistance to local services,<sup>35</sup> local media in the language of the target  
284 population,<sup>36</sup> community leaders and/or community health workers,<sup>26,28,31,32</sup> home health  
285 outreach services,<sup>28,31</sup> and healthcare providers.<sup>33,37</sup>

## 286 **DISCUSSION**

287 The findings from the existing but scarce literature highlight critical factors necessary in  
288 facilitating intersectoral collaboration and the successful integration of refugee services within  
289 existing health systems. The three research questions studied demonstrated barriers and  
290 facilitators, enabling strategies recorded in the literature, and the stakeholders involved. This  
291 section will summarize key themes across these topics and discuss implications for program  
292 implementation, policy and future research.

293

### 294 **Coordination of Existing Public and Private Services**

295 A networked approach to service delivery during the initial reception of refugees can often  
296 mitigate some of the difficulties encountered by refugee communities. Some examples of  
297 coordination of services were seen in Italy,<sup>34</sup> Australia,<sup>27</sup> the US,<sup>37</sup> and Canada.<sup>35</sup> In Canada,  
298 where a network of “gateway services” was tested using the “Reception House” model, it  
299 successfully provided responsive and culturally sensitive primary care.<sup>35</sup> By partnering  
300 community and translation services, as well as health care providers with the Reception House, it  
301 decreased wait times and improved health care access through referrals and coordination of  
302 services.<sup>35</sup> Further analysis with costing studies on a tailored package of health services for  
303 vulnerable populations could help to support improved financing of efforts at coordination of  
304 services across sectors.

### 305 **Introduction of a System Navigator Role**

306 Integration works through establishing relationships across networks of local stakeholders and  
307 service providers. To coordinate this effectively, a system navigator role can be established – the  
308 evidence suggests that this role is most effective in the early stage of resettlement.<sup>35</sup> The system  
309 navigation role can be played by an organization or by people within the existing health or social  
310 systems. It connects incoming refugees to timely, culturally-appropriate care in the community  
311 without creating parallel structures that either threaten host communities or further stigmatize  
312 refugees.<sup>30,35</sup> The likelihood of success of a system navigator role is further strengthened when  
313 providers have access to the knowledge, tools and training needed to address the specific needs  
314 of refugees, including the more vulnerable subgroups (e.g., the elderly, women, and children).  
315 Providers need to understand the context in which they work and the available features and  
316 services, user needs, and legislation as it relates to refugees.<sup>34</sup> Those playing a coordination or

1  
2  
3 317 system navigation role should also be able to build strong networks with allied specialists,  
4  
5 318 identify appropriate resources and reach out to users.<sup>34,35</sup> The risk here however is that  
6  
7 319 integrating refugee care may eliminate some determination procedures, potentially undermining  
8  
9 320 the protection mandate and underestimate the tailored needs of refugees dealing with significant  
10  
11 321 trauma.<sup>41</sup> Future research on the required competencies of the system navigator role is required  
12  
13 322 to ensure that appropriate professionals are recruited and trained.  
14  
15

### 16 17 323 **Advocacy and Legislative Support**

18  
19 324 Exclusionary immigration policies can play a considerable role in marginalization and  
20  
21 325 discrimination against refugee communities leading to decreased health seeking behaviors and  
22  
23 326 use of available integrated or intersectoral services.<sup>40</sup> Effective advocacy needs to target the  
24  
25 327 policy-making levels in order to counteract the negative impacts of exclusionary policies.  
26  
27 328 Advocacy by health care providers can be influential at the institutional level to push for better  
28  
29 329 allocation of services and funding.<sup>31</sup> A multipronged approach may be necessary to continue to  
30  
31 330 advocate for the right to health for refugees by addressing legal challenges, establishing timely  
32  
33 331 and accurate data and information systems to capture needs, creating health promoting  
34  
35 332 environments, investing in person-centred, culturally-appropriate and easily accessible services,  
36  
37 333 and evaluating coordination and service delivery efforts. Engaging policy makers in knowledge  
38  
39 334 translation and evidence-informed decision-making is one way to effectively advocate and  
40  
41 335 provide legislative support in refugee health. In Lebanon for example, where there are huge  
42  
43 336 demands in meeting the health needs of a large Syrian refugee population, researchers engaged  
44  
45 337 policy-makers in knowledge production (i.e. research priority-setting), translation and uptake  
46  
47 338 activities.<sup>42</sup> This ultimately led to the hiring of a refugee health coordinator by the Lebanese  
48  
49 339 Ministry of Public Health. The refugee health coordinator role functioned to support intersectoral  
50  
51  
52  
53  
54  
55  
56  
57  
58  
59

1  
2  
3 340 collaboration, assisting in strategic planning and implementation of action plans to respond to the  
4  
5 341 health needs of Syrian refugees including helping with the development of refugee health  
6  
7 342 information systems at the Ministry of Public Health.<sup>42</sup> The UCL-Lancet Commission on  
8  
9  
10 343 Migration and Health also supports knowledge translation by bringing together academics,  
11  
12 344 policymakers, and health system experts to take an inter-disciplinary approach to reviewing  
13  
14 345 evidence, develop policy recommendations and disseminate these findings globally amongst  
15  
16 346 policymakers and institutions.<sup>43</sup>

### 19 347 **Alternative Models of Care to Reach Vulnerable Women and Children**

21 348 Among the studies that reported targeted interventions for women and children, alternative  
22  
23 349 models of care were used. This included mobile health clinics, and programs linked to schools to  
24  
25 350 support screening and active case finding. These alternate models increased accessibility of  
26  
27 351 essential health services, increase detection of health conditions, and improve coordination of  
28  
29 352 care, and reduced feelings of social isolation.<sup>27,28</sup> This suggests that flexible service delivery and  
30  
31 353 innovation in mode of delivery should be considered when attempting to reach at risk refugee  
32  
33 354 groups. Better collection and use of evidence on the needs of vulnerable refugee subgroups and  
34  
35 355 how to target them are essential next steps to design appropriate service delivery models.

### 39 356 **Policy Insights**

41  
42 357 From the available evidence, the following are policy insights to inform greater integration of  
43  
44 358 services and/or intersectoral collaboration. These recommendations are based on consistent  
45  
46 359 facilitators and barriers identified across studies included in this review. They are critical starting  
47  
48 360 points in enhancing programs to better serve refugees while promoting efficiency in health  
49  
50 361 systems.

- 1  
2  
3 362 1) Strengthening the coordination between existing programs through financing stronger  
4  
5 363 referral systems and colocation of services  
6  
7
- 8 364 2) Incentivizing health and social service authorities to establish and finance formal system  
9  
10 365 navigator roles that connect all relevant services – provision of information technology  
11  
12 366 tools can help support this function and better manage the network of available programs  
13  
14
- 15 367 3) Engaging host communities to enhance understanding, reduce stigma, and to create an  
16  
17 368 enabling environment for policies that protect refugees and their rights to social  
18  
19 369 determinants of health  
20  
21
- 22 370 4) Communicating the availability of programs and services through cultural mediators and  
23  
24 371 establishing formal translation and transport services to improve access  
25
- 26 372 5) Establishing training and resources for providers to a) better understand the needs of  
27  
28 373 refugee communities, b) be aware of available and relevant services for referral across  
29  
30 374 sectors, and c) more efficiently manage cases  
31  
32

### 33 375 **Limitations and Future Directions**

34  
35 376 Our review was limited by the scarcity of evidence in this area. Due to this, all relevant studies  
36  
37 377 were included, therefore, quality and rigor may vary. Some key programs and approaches may  
38  
39 378 be missing due to interventions occurring at the individual level instead of at the systems level,  
40  
41 379 as well as not having been published in academic literature. Individual health providers or  
42  
43 380 organizations will navigate barriers in health systems through tacit and experiential knowledge  
44  
45 381 that is often not documented. Data will be further amplified by conducting key informant  
46  
47 382 interviews in selected countries.  
48  
49  
50

51 383 As others have noted, the literature on intersectoral collaboration disproportionately  
52  
53 384 focuses on high-income countries.<sup>44</sup> It is therefore no surprise that the evidence for this review  
54  
55  
56  
57  
58  
59  
60

1  
2  
3 385 largely came from high-income countries with only two studies conducted in upper-middle  
4  
5 386 income and two in low-income countries. This may affect the generalizability of the findings  
6  
7 387 reported here as low-income and middle-income countries have greater coordination challenges  
8  
9 388 to overcome due to fragmented systems and weak governance.<sup>45</sup> Additionally, according to the  
10  
11 389 latest report on the UN Refugee Agency, approximately 85% of refugees are hosted in  
12  
13 390 developing nations.<sup>46</sup> More evidence and special consideration is needed in these contexts with  
14  
15 391 respect to refugee health, particularly for those most at risk subgroups such as women, children  
16  
17 392 and the elderly.

18  
19  
20  
21 393 Although there exists reaffirmed enthusiasm in intersectoral approaches to achieving  
22  
23 394 global health agendas such as the SDGs, it has been found that the lack of quality evidence  
24  
25 395 represents an essential hurdle to evidence-informed decision-making for the development of  
26  
27 396 cross-cutting policies and governance required for sustained intersectoral collaboration.<sup>44</sup> This  
28  
29 397 pattern of a dearth of evidence was seen in our review. Additionally, most of what has been  
30  
31 398 written has not been grounded in relevant theories or frameworks.<sup>45</sup> Our use of frameworks to  
32  
33 399 structure our analysis is a step forward in addressing this issue. Generating high quality data in  
34  
35 400 health systems and policy research for migrant health and on intersectoral approaches has been  
36  
37 401 identified as a research priority.<sup>44,47</sup> Future research should therefore also consider the structured  
38  
39 402 evaluation of evidence through a frameworked approach.

## 403 **CONCLUSION**

404 Refugees experience individual, institutional, and system level obstacles when seeking health  
45  
46 405 care. To ensure adequate health services tailored to this vulnerable population, conducting  
47  
48 406 research and gathering quality evidence on integrated and intersectoral approaches is a top  
49  
50  
51  
52  
53  
54  
55  
56  
57  
58  
59  
60

1  
2  
3 407 priority. This scoping review has highlighted important gaps in current knowledge and made  
4  
5 408 suggestions for future research relevant to key themes.  
6

7  
8 409 Our findings indicate that policies aiming at integrating services and fostering  
9  
10 410 intersectoral action should consider system-level approaches such as the colocation of services,  
11  
12 411 transportation support, and establishing system navigator roles. Communication challenges due  
13  
14 412 to language barriers should also be addressed with a view of providing culturally-sensitive  
15  
16 413 programs. There is also a need to strengthen the capacities of frontline providers and managers,  
17  
18 414 to improve their knowledge of available services as well as their ability to provide care to  
19  
20 415 specialized vulnerable groups such as refugees. Engaging host communities around a human  
21  
22 416 rights-focused strategy to the health of refugees is also fundamental to address discrimination  
23  
24 417 and stigma. Current gaps in knowledge found in our study represent an untapped potential for  
25  
26 418 improvements to financial and human resource efficiency in health systems. Given the limited  
27  
28 419 evidence we found in our scoping review, the momentum for continued research should be  
29  
30 420 sustained.  
31  
32  
33  
34  
35  
36  
37

## 38 422 **ETHICS APPROVAL**

39  
40 423 Ethics approval was not required for this scoping review as human subjects are not involved.  
41  
42

## 43 424 **AUTHOR'S CONTRIBUTIONS**

44  
45 425 GT together with librarians at Karolinska Institutet identified databases and planned the literature  
46  
47 426 search. SH & DJ drafted the paper and incorporated co-author feedback, SH & DJ abstracted data  
48  
49 427 from peer-reviewed literature. SC, EVL, GT and PF provided critical feedback and comments on  
50  
51 428 the manuscript. SC and SH acted as secondary reviewers.  
52  
53  
54

## 55 429 **ACKNOWLEDGMENTS**

1  
2  
3 430 The authors would like to thank Karolinska Institutet librarians, Magdalena Svanberg and Gun  
4  
5 431 Brit Knutssön, for their contributions, specifically in running the search and identifying  
6  
7 432 appropriate databases. We are also grateful to WHO Euro for their discussions and suggestions  
8  
9 433 in the early stages of this project.  
10  
11

#### 12 434 **DATA AVAILABILITY STATEMENT**

13  
14  
15 435 No data are available.

#### 16 17 436 **COMPETING INTERESTS**

18  
19 437 None.

#### 20 21 438 **FUNDING STATEMENT**

22  
23  
24 439 No funding was obtained for this project. In-kind time contributions from staff at the Alliance for  
25  
26 440 Health Policy and Systems Research and SIGHT have made this possible.  
27  
28

#### 29 441 **REFERENCES**

- 30  
31 442 1 OHCHR. The Right to Health. Geneva, Switzerland, 2008.  
32 443 2 Tangcharoensathien V, Mills A, Palu T. Accelerating health equity: the key role of  
33 444 universal health coverage in the Sustainable Development Goals. *BMC Med* 2015; **13**:  
34 445 101.  
35 446 3 UNHCR. Convention and Protocol relating to the status of refugees. Geneva, Switzerland,  
36 447 2010.  
37 448 4 UNHCR. UNHCR viewpoint: ‘Refugee’ or ‘migrant’ – Which is right? Geneva,  
38 449 Switzerland, 2016.  
39  
40 450 5 Rechel B, Mladovsky P, Ingleby D, Mackenbach JP, McKee M. Migration and health in  
41 451 an increasingly diverse Europe. *Lancet* 2013; **381**: 1235–45.  
42 452 6 Council for the EU. Council Directive 2003/9/EC of 27 January 2003 Laying Down  
43 453 Minimum Standards for the Reception of Asylum Seekers in Member States. *Off J Eur*  
44 454 *Union* 2003 2003; : L 31/18.  
45  
46 455 7 OHCHR. General Recommendation 30. Discrimination against non-citizens. Geneva,  
47 456 Switzerland, 2004.  
48 457 8 Jackson-Bowers, Eleanor, Cheng I-H. Meeting the primary health care needs of refugees  
49 458 and asylum seekers. *Res Roundup* 2010.  
50 459 9 WHO. Advancing the right to health: the vital role of law. Geneva, Switzerland, 2017.  
51 460 10 Joshi C, Russell G, Cheng I-H, *et al*. A narrative synthesis of the impact of primary health  
52 461 care delivery models for refugees in resettlement countries on access, quality and  
53 462 coordination. *Int J Equity Health* 2013; **12**: 88.  
54  
55 463 11 Citizenship AGD of I and. Fact sheet 60 - Australia’s refugee and humanitarian program.  
56 464 2012.  
57  
58  
59  
60



- 1  
2  
3 465 12 UN. Integrated Approaches to Sustainable Development Planning and Implementation. New York, USA, 2015.
- 4 466  
5 467 13 Kett ME. Internally Displaced Peoples in Bosnia-Herzegovina: Impacts of Long-term  
6 468 Displacement on Health and Well-being. *Med Confl Surviv* 2005; **21**: 199–215.
- 7 469 14 Patel N, Kellezi B, Williams AC de C. Psychological, social and welfare interventions for  
8 470 psychological health and well-being of torture survivors. *Cochrane Database Syst Rev*  
9 471 2014; published online Nov 11. DOI:10.1002/14651858.CD009317.pub2.
- 10 472 15 Arksey H, O'Malley L. Scoping studies: towards a methodological framework. *Int J Soc*  
11 473 *Res Methodol* 2005; **8**: 19–32.
- 12 474 16 Tricco AC, Lillie E, Zarin W, *et al*. A scoping review on the conduct and reporting of  
13 475 scoping reviews. *BMC Med Res Methodol* 2016; **16**: 15.
- 14 476 17 Peters MDJ, Godfrey CM, Khalil H, McInerney P, Parker D, Baldini Soares C. The  
15 477 Joanna Briggs Institute Reviewers' Manual: Methodology for JBI Scoping Review.  
16 478 Adelaide, Australia, 2015.
- 17 479 18 Center for Open Science. Open Science Framework. <https://osf.io/>.
- 18 480 19 Javadi D, Langlois E V., Ho S, Friberg P, Tomson G. Intersectoral approaches and  
19 481 integrated services in achieving the right to health for refugees upon resettlement: a  
20 482 scoping review protocol. *BMJ Open* 2017; **7**. DOI:10.1136/bmjopen-2017-016638.
- 21 483 20 Walt G, Shiffman J, Schneider H, Murray SF, Brugha R, Gilson L. 'Doing' health policy  
22 484 analysis: methodological and conceptual reflections and challenges. *Health Policy Plan*  
23 485 2008; **23**: 308–17.
- 24 486 21 Atun R, de Jongh T, Secci F, Ohiri K, Adeyi O. Integration of targeted health  
25 487 interventions into health systems: a conceptual framework for analysis. *Health Policy*  
26 488 *Plan* 2010; **25**: 104–11.
- 27 489 22 WHO. Health in All Policies: Framework for Country Action. Geneva, Switzerland, 2014.
- 28 490 23 Thomas J, Harden A. Methods for the thematic synthesis of qualitative research in  
29 491 systematic reviews. *BMC Med Res Methodol* 2008; **8**: 45.
- 30 492 24 McNaughton DB, Hindin P, Guerrero Y. Directions for Refining a School Nursing  
31 493 Intervention for Mexican Immigrant Families. *J Sch Nurs* 2010; **26**: 430–5.
- 32 494 25 Cowell JM, McNaughton D, Ailey S, Gross D, Fogg L. Clinical Trial Outcomes of the  
33 495 Mexican American Problem Solving Program (MAPS). *Hisp Heal Care Int* 2009; **7**: 178–  
34 496 89.
- 35 497 26 Verhagen I, Ros WJ, Steunenberg B, de Wit NJ. Culturally sensitive care for elderly  
36 498 immigrants through ethnic community health workers: design and development of a  
37 499 community based intervention programme in the Netherlands. *BMC Public Health* 2013;  
38 500 **13**: 227.
- 39 501 27 Woodland L, Kang M, Elliot C, Perry A, Eagar S, Zwi K. Evaluation of a school  
40 502 screening programme for young people from refugee backgrounds. *J Paediatr Child*  
41 503 *Health* 2016; **52**: 72–9.
- 42 504 28 Lilleston P, Winograd L, Ahmed S, *et al*. Evaluation of a mobile approach to gender-  
43 505 based violence service delivery among Syrian refugees in Lebanon. *Health Policy Plan*  
44 506 2018; published online June 13. DOI:10.1093/heapol/czy050.
- 45 507 29 Guruge S, Hunter J, Barker K, McNally MJ, Magalhães L. Immigrant women's  
46 508 experiences of receiving care in a mobile health clinic. *J Adv Nurs* 2010; **66**: 350–9.
- 47 509 30 Calvo R, Rojas V, Waters MC. The Effect of Universal Service Delivery on the  
48 510 Integration of Moroccan Immigrants in Spain: A Case Study from an Anti-Oppressive

- 1  
2  
3 511 Perspective. *Br J Soc Work* 2014; **44**: i123–39.
- 4 512 31 Mortensen A. Public health system responsiveness to refugee groups in New Zealand:  
5 513 activation from the bottom up. *Soc Policy J New Zeal* 2011.
- 6 514 32 Stewart M, Anderson J, Beiser M, *et al*. Multicultural Meanings of Social Support among  
7 515 Immigrants and Refugees. *Int Migr* 2008; **46**: 123–59.
- 8 516 33 MacFarlane A, Singleton C, Green E. Language barriers in health and social care  
9 517 consultations in the community: A comparative study of responses in Ireland and England.  
10 518 *Health Policy (New York)* 2009; **92**: 203–10.
- 11 519 34 Catarci M. Conceptions and Strategies for User Integration across Refugee Services in  
12 520 Italy. *J Educ Cult Psychol Stud* 2012.
- 13 521 35 McMurray J, Breward K, Breward M, Alder R, Arya N. Integrated Primary Care Improves  
14 522 Access to Healthcare for Newly Arrived Refugees in Canada. *J Immigr Minor Heal* 2014;  
15 523 **16**: 576–85.
- 16 524 36 Kim MJ, Cho H-I, Cheon-Klessig YS, Gerace LM, Camilleri DD. Primary health care for  
17 525 Korean immigrants: sustaining a culturally sensitive model. *Public Health Nurs*; **19**: 191–  
18 526 200.
- 19 527 37 Yeung A, Kung WW, Chung H, *et al*. Integrating psychiatry and primary care improves  
20 528 acceptability to mental health services among Chinese Americans. *Gen Hosp Psychiatry*  
21 529 2004; **26**: 256–60.
- 22 530 38 Geltman PL, Cochran J. A Private-Sector Preferred Provider Network Model for Public  
23 531 Health Screening of Newly Resettled Refugees. *Am J Public Health* 2005; **95**: 196–9.
- 24 532 39 Woodland L, Burgner D, Paxton G, Zwi K. Health service delivery for newly arrived  
25 533 refugee children: A framework for good practice. *J Paediatr Child Health* 2010; **46**: 560–  
26 534 7.
- 27 535 40 Philbin MM, Flake M, Hatzenbuehler ML, Hirsch JS. State-level immigration and  
28 536 immigrant-focused policies as drivers of Latino health disparities in the United States. *Soc*  
29 537 *Sci Med* 2018; **199**: 29–38.
- 30 538 41 Tuepker A, Chi C. Evaluating integrated healthcare for refugees and hosts in an African  
31 539 context. *Heal Econ Policy Law* 2009; **4**: 159.
- 32 540 42 Langlois E V., Daniels K, Akl EA. Evidence synthesis for health policy and systems: a  
33 541 methods guide. Geneva, Switzerland, 2018.
- 34 542 43 The UCL-Lancet Commission on Migration and Health. UCL-Lancet Commission on  
35 543 Migration and Health. 2018.
- 36 544 44 Glandon D, Meghani A, Jessani N, Qiu M, Bennett S. Identifying health policy and  
37 545 systems research priorities on multisectoral collaboration for health in low-income and  
38 546 middle-income countries. *BMJ Glob Heal* 2018; **3**: e000970.
- 39 547 45 Bennett S, Glandon D, Rasanathan K. Governing multisectoral action for health in low-  
40 548 income and middle-income countries: unpacking the problem and rising to the challenge.  
41 549 *BMJ Glob Heal* 2018; **3**: e000880.
- 42 550 46 UNHCR. Global Trends Forced Displacement in 2017. Geneva, Switzerland, 2018  
43 551 <https://www.unhcr.org/5b27be547.pdf>.
- 44 552 47 Abubakar I, Aldridge RW, Devakumar D, *et al*. The UCL–Lancet Commission on  
45 553 Migration and Health: the health of a world on the move. *Lancet* 2018; **392**: 2606–54.
- 46 554  
47 555

1  
2  
3  
4  
5  
6  
7  
8  
9  
10  
11  
12  
13  
14  
15  
16  
17  
18  
19  
20  
21  
22  
23  
24  
25  
26  
27  
28  
29  
30  
31  
32  
33  
34  
35  
36  
37  
38  
39  
40  
41  
42  
43  
44  
45  
46  
47  
48  
49  
50  
51  
52  
53  
54  
55  
56  
57  
58  
59  
60

556 **Figure Legend**

557 **Figure 1: Scoping Review Flowchart**

558 **Table 1: Summary of Included Studies**

559 **Table 2: Barriers and Facilitators Commonly Discussed Across Studies**

560 **Table 3: Enabling Strategies Present Across Studies**

For peer review only

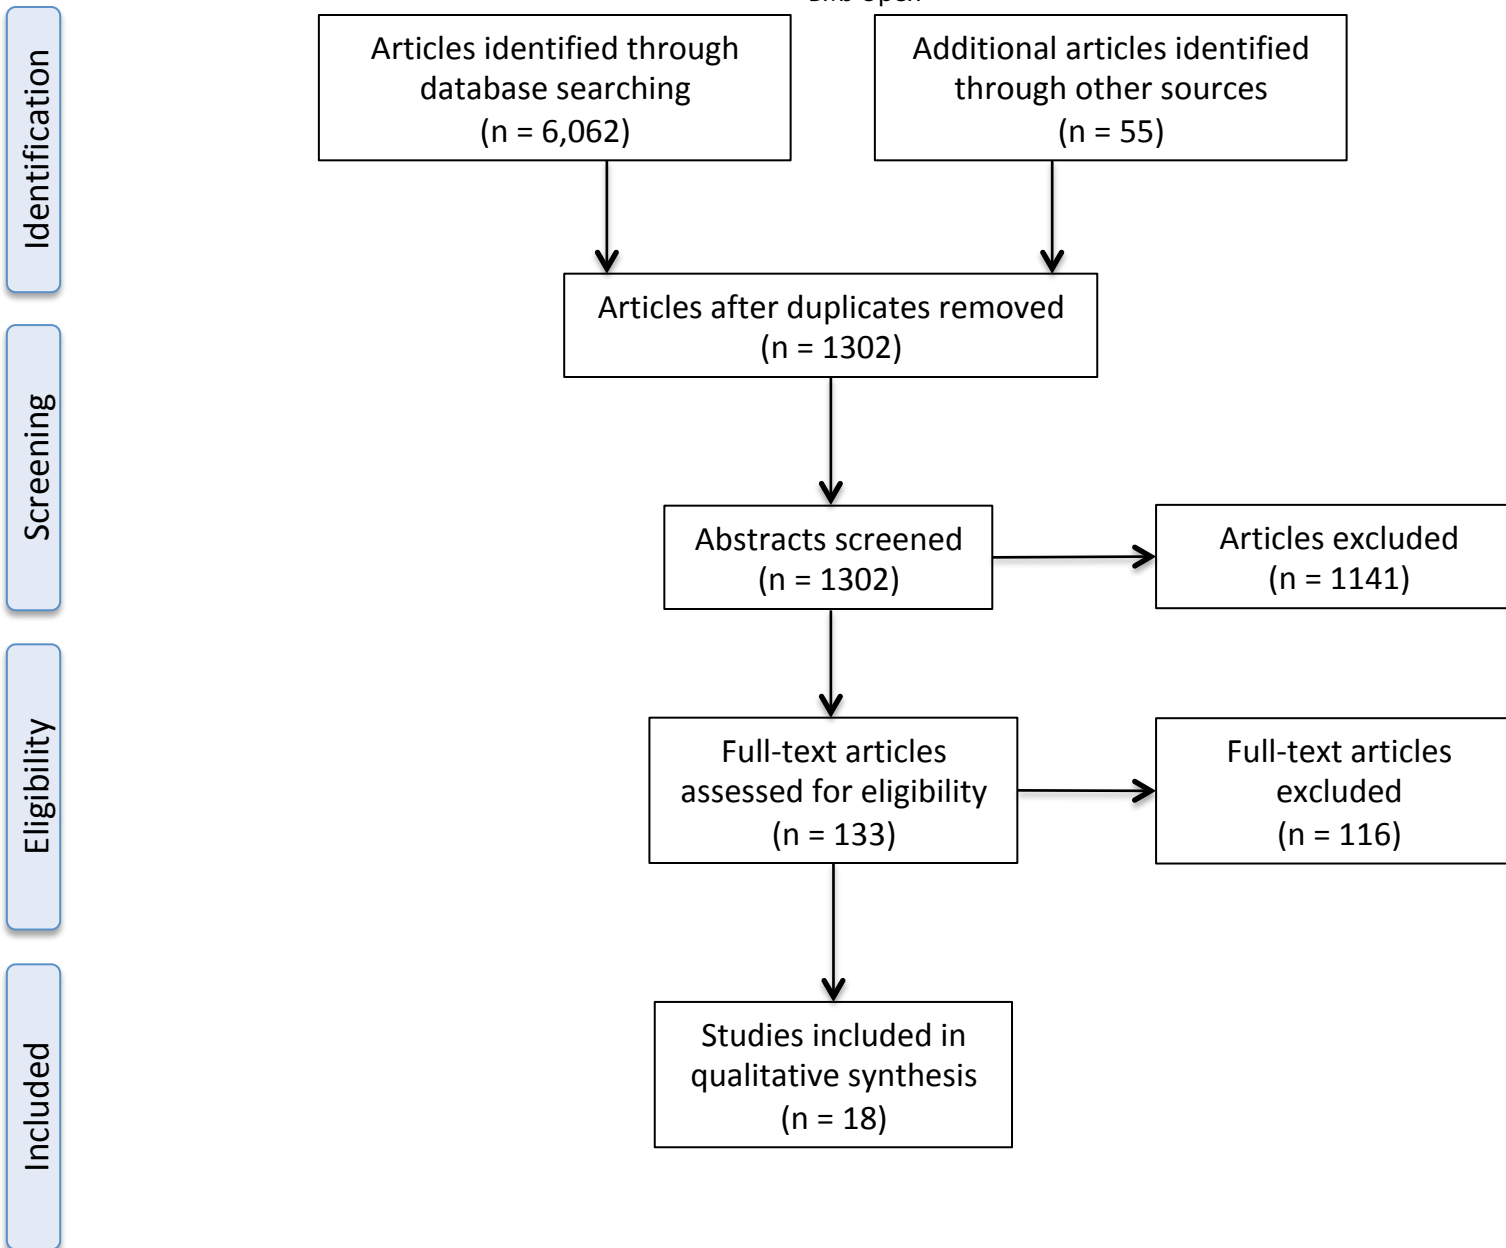

## 1 APPENDIX I

## 2 1. Medline (Ovid)

3 Date of Search: 2016-11-03

4 Number of hits: 2019

5 Comments:

6 Field labels:

7 .tw,kf. = title, abstract, keyword

8 exp/ = MeSH, exploded

9 / = MeSH, not exploded

10 adj3 = within two words

11 1. Refugees/

12 2. exp "Emigrants and Immigrants"/

13 3. "Emigration and Immigration"/

14 4. "Transients and Migrants"/

15 5. (refugee\* or immigra\* or migrat\* or migrant\* or asylum\* or transient\*).tw,kf.

16 6. or/1-5

17 7. Delivery of Health Care/

18 8. Health Services Accessibility/

19 9. Patient Acceptance of Health Care/

20 10. "Health Services Needs and Demand"/

21 11. Quality of Health Care/

22 12. Interinstitutional Relations/

23 13. Interdepartmental Relations/

24 14. Public-Private Sector Partnerships/

25 15. ((health care or healthcare or health service\*) adj3 (access\* or availab\* or barrier\* or deliver\* or need\* or provision\* or seeking or quality or utilization)).tw,kf.

26 16. ((multisector\* or multi-sector\* or intersector\* or inter-sector\* or crossector\* or cross-sector\* or interdisciplinary or inter-disciplinary or multidisciplinary or multi-disciplinary or interinstitution\* or inter-institution\* or interdepartment\* or inter-department\*) adj3 (analysis or collaborat\* or cooperat\* or co-operat\* or approach\* or partnership\* or relation\*)).tw,kf.

27 17. or/7-16

28 18. Healthcare Disparities/

29 19. Social Determinants of Health/

30 20. Health Status Disparities/

31 21. Health Equity/

32 22. exp Human Rights/

33 23. ((health or health care or healthcare or health service\*) adj3 (situation or difference\*)).tw,kf.

34 24. (disparit\* or equity or equities or inequity or inequities or equalit\* or inequalit\* or right\* or injustice\* or discrimination\* or determinant\* or disadvantage\* or vulnerab\*).tw,kf.

35 25. or/18-24

36 26. 6 and 17 and 25

37 27. Remove duplicates from 26

28. limit 27 to yr="2000 -Current"

## 2. Web of Science (Thomson Reuter)

Date of Search: 2016-11-03  
 Number of hits: 1.166  
 Comments:

Field labels:  
 TOPIC = title, abstract, keywords  
 NEAR/3 = within 3 words

#1 TOPIC: (refugee\* or immigra\* or migrat\* or migrant\* or asylum\* or transient\*)

#2 TOPIC: (("health care" or healthcare or "health service\*") NEAR/3 (access\* or availab\* or barrier\* or deliver\* or need\* or provision\* or seeking or quality or utilization))

#3 TOPIC: ((multisector\* or multi-sector\* or intersector\* or inter-sector\* or crosssector\* or cross-sector\* or interdisciplinary or inter-disciplinary or multidisciplinary or multi-disciplinary or interinstitution\* or inter-institution\* or interdepartment\* or inter-department\*) NEAR/3 (analysis or collaborat\* or cooperat\* or co-operat\* or approach\* or partnership\* or relation\*))

#4 #3 OR #2

#5 TOPIC: ((health or "health care" or healthcare or "health service\*") NEAR/3 (situation or difference\*))

#6 TOPIC: (disparit\* or equity or equities or inequity or inequities or equalit\* or inequalit\* or "human right\*" or "civil right\*" or "citizen\* right\*" or "social right\*" or injustice\* or discrimination\* or determinant\* or disadvantage\* or vulnerab\*)

#7 #6 OR #5

#8 #7 AND #4 AND #1

#9 Timespan: 2000-2016.

8

## 3. Global Health (Ovid)

Date of Search: 2016-11-03  
 Number of hits: 497  
 Comments:

Field labels:  
 .ab,ti. = title, abstract  
 exp/ =thesaurus term, exploded  
 / = thesaurus term, not exploded  
 adj3 = within two words

1. refugees/
2. immigrants/
3. migrants/
4. immigration/
5. (refugee\* or immigra\* or migrat\* or migrant\* or asylum\* or transient\*).ab,ti.
6. or/1-5
7. health care utilization/
8. ((health care or healthcare or health service\*) adj3 (access\* or availab\* or barrier\* or deliver\* or need\* or provision\* or seeking or quality or utilization)).ab,ti.
9. ((multisector\* or multi-sector\* or intersector\* or inter-sector\* or crosssector\* or cross-sector\* or interdisciplinary or inter-disciplinary or multidisciplinary or multi-disciplinary or interinstitution\* or inter-institution\* or interdepartment\* or inter-department\*) adj3 (analysis or collaborat\* or cooperat\* or co-operat\* or approach\* or partnership\* or relation\*)).ti,ab.
10. or/8-9
11. exp disparity/
12. exp discrimination/
13. human rights/
14. ((health or health care or healthcare or health service\*) adj3 (situation or difference\*)).ti,ab.
15. (disparit\* or equity or equities or inequity or inequities or equalit\* or inequalit\* or right\* or injustice\* or discrimination\* or determinant\* or disadvantage\* or vulnerab\*).ti,ab.
16. or/11-15
17. 6 and 10 and 16
18. limit 17 to yr="2000 -Current"

9

10

11

## 4. PsycInfo (OVID)

Date of Search: 2016-11-03  
 Number of hits: 667  
 Comments:

Field labels:  
 .ti,ab,id. = title, abstract, keyword  
 exp/ = subject heading, exploded  
 / = subject heading, not exploded  
 adj3 = within two words

1. exp Human Migration/
2. Immigration/
3. (refugee\* or immigra\* or migrat\* or migrant\* or asylum\* or transient\*).ti,ab,id.
4. or/1-3
  
5. Health Care Delivery/
6. Health Care Utilization/
7. Health Care Seeking Behavior/
8. Health Service Needs/
9. "Quality of Care"/
10. ((health care or healthcare or health service\*) adj3 (access\* or availab\* or barrier\* or deliver\* or need\* or provision\* or seeking or quality or utilization)).ti,ab,id.
11. ((multisector\* or multi-sector\* or intersector\* or inter-sector\* or crosssector\* or cross-sector\* or interdisciplinary or inter-disciplinary or multidisciplinary or multi-disciplinary or interinstitution\* or inter-institution\* or interdepartment\* or inter-department\*) adj3 (analysis or collaborat\* or cooperat\* or co-operat\* or approach\* or partnership\* or relation\*)).ti,ab,id.
12. or/5-11
  
13. Health Disparities/
14. Social Equality/
15. exp Human Rights/
16. ((health or health care or healthcare or health service\*) adj3 (situation or difference\*)).ti,ab,id.
  
17. (disparit\* or equity or equities or inequity or inequities or equalit\* or inequalit\* human right\* or civil right\* or citizen\* right\* or social right\* or injustice\* or discrimination\* or determinant\* or disadvantage\* or vulnerab\*).ti,ab,id.
18. or/13-17
  
19. 4 and 12 and 18
20. limit 19 to yr="2000 -Current"

12

13

14

15

16



## Preferred Reporting Items for Systematic reviews and Meta-Analyses extension for Scoping Reviews (PRISMA-ScR) Checklist

| SECTION                           | ITEM | PRISMA-ScR CHECKLIST ITEM                                                                                                                                                                                                                                                                                  | REPORTED ON PAGE #                                                                                        |
|-----------------------------------|------|------------------------------------------------------------------------------------------------------------------------------------------------------------------------------------------------------------------------------------------------------------------------------------------------------------|-----------------------------------------------------------------------------------------------------------|
| <b>TITLE</b>                      |      |                                                                                                                                                                                                                                                                                                            |                                                                                                           |
| Title                             | 1    | Identify the report as a scoping review.                                                                                                                                                                                                                                                                   | p. 1                                                                                                      |
| <b>ABSTRACT</b>                   |      |                                                                                                                                                                                                                                                                                                            |                                                                                                           |
| Structured summary                | 2    | Provide a structured summary that includes (as applicable): background, objectives, eligibility criteria, sources of evidence, charting methods, results, and conclusions that relate to the review questions and objectives.                                                                              | p. 2                                                                                                      |
| <b>INTRODUCTION</b>               |      |                                                                                                                                                                                                                                                                                                            |                                                                                                           |
| Rationale                         | 3    | Describe the rationale for the review in the context of what is already known. Explain why the review questions/objectives lend themselves to a scoping review approach.                                                                                                                                   | p. 5                                                                                                      |
| Objectives                        | 4    | Provide an explicit statement of the questions and objectives being addressed with reference to their key elements (e.g., population or participants, concepts, and context) or other relevant key elements used to conceptualize the review questions and/or objectives.                                  | p. 5                                                                                                      |
| <b>METHODS</b>                    |      |                                                                                                                                                                                                                                                                                                            |                                                                                                           |
| Protocol and registration         | 5    | Indicate whether a review protocol exists; state if and where it can be accessed (e.g., a Web address); and if available, provide registration information, including the registration number.                                                                                                             | p. 2<br>Registered on Open Science Framework<br><a href="https://osf.io/gt9ck/">https://osf.io/gt9ck/</a> |
| Eligibility criteria              | 6    | Specify characteristics of the sources of evidence used as eligibility criteria (e.g., years considered, language, and publication status), and provide a rationale.                                                                                                                                       | p. 6-7                                                                                                    |
| Information sources*              | 7    | Describe all information sources in the search (e.g., databases with dates of coverage and contact with authors to identify additional sources), as well as the date the most recent search was executed.                                                                                                  | Supplementary File                                                                                        |
| Search                            | 8    | Present the full electronic search strategy for at least 1 database, including any limits used, such that it could be repeated.                                                                                                                                                                            | Supplementary File                                                                                        |
| Selection of sources of evidence† | 9    | State the process for selecting sources of evidence (i.e., screening and eligibility) included in the scoping review.                                                                                                                                                                                      | p. 6-7                                                                                                    |
| Data charting process‡            | 10   | Describe the methods of charting data from the included sources of evidence (e.g., calibrated forms or forms that have been tested by the team before their use, and whether data charting was done independently or in duplicate) and any processes for obtaining and confirming data from investigators. | p. 8                                                                                                      |
| Data items                        | 11   | List and define all variables for which data were sought and any assumptions and simplifications made.                                                                                                                                                                                                     | p. 6-8                                                                                                    |
| Critical appraisal                | 12   | If done, provide a rationale for conducting a                                                                                                                                                                                                                                                              | p. 21                                                                                                     |

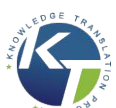

| SECTION                                       | ITEM | PRISMA-ScR CHECKLIST ITEM                                                                                                                                                                       | REPORTED ON PAGE #  |
|-----------------------------------------------|------|-------------------------------------------------------------------------------------------------------------------------------------------------------------------------------------------------|---------------------|
| of individual sources of evidence§            |      | critical appraisal of included sources of evidence; describe the methods used and how this information was used in any data synthesis (if appropriate).                                         |                     |
| Synthesis of results                          | 13   | Describe the methods of handling and summarizing the data that were charted.                                                                                                                    | p. 8                |
| <b>RESULTS</b>                                |      |                                                                                                                                                                                                 |                     |
| Selection of sources of evidence              | 14   | Give numbers of sources of evidence screened, assessed for eligibility, and included in the review, with reasons for exclusions at each stage, ideally using a flow diagram.                    | p. 9                |
| Characteristics of sources of evidence        | 15   | For each source of evidence, present characteristics for which data were charted and provide the citations.                                                                                     | p. 7-9              |
| Critical appraisal within sources of evidence | 16   | If done, present data on critical appraisal of included sources of evidence (see item 12).                                                                                                      | p. 21               |
| Results of individual sources of evidence     | 17   | For each included source of evidence, present the relevant data that were charted that relate to the review questions and objectives.                                                           | p. 9-17, tables 1-3 |
| Synthesis of results                          | 18   | Summarize and/or present the charting results as they relate to the review questions and objectives.                                                                                            | p. 9-17; tables 1-3 |
| <b>DISCUSSION</b>                             |      |                                                                                                                                                                                                 |                     |
| Summary of evidence                           | 19   | Summarize the main results (including an overview of concepts, themes, and types of evidence available), link to the review questions and objectives, and consider the relevance to key groups. | p. 17-21            |
| Limitations                                   | 20   | Discuss the limitations of the scoping review process.                                                                                                                                          | p. 21-22            |
| Conclusions                                   | 21   | Provide a general interpretation of the results with respect to the review questions and objectives, as well as potential implications and/or next steps.                                       | p. 22-23            |
| <b>FUNDING</b>                                |      |                                                                                                                                                                                                 |                     |
| Funding                                       | 22   | Describe sources of funding for the included sources of evidence, as well as sources of funding for the scoping review. Describe the role of the funders of the scoping review.                 | p. 24               |

JBI = Joanna Briggs Institute; PRISMA-ScR = Preferred Reporting Items for Systematic reviews and Meta-Analyses extension for Scoping Reviews.

\* Where *sources of evidence* (see second footnote) are compiled from, such as bibliographic databases, social media platforms, and Web sites.

† A more inclusive/heterogeneous term used to account for the different types of evidence or data sources (e.g., quantitative and/or qualitative research, expert opinion, and policy documents) that may be eligible in a scoping review as opposed to only studies. This is not to be confused with *information sources* (see first footnote).

‡ The frameworks by Arksey and O'Malley (6) and Levac and colleagues (7) and the JBI guidance (4, 5) refer to the process of data extraction in a scoping review as data charting.

§ The process of systematically examining research evidence to assess its validity, results, and relevance before using it to inform a decision. This term is used for items 12 and 19 instead of "risk of bias" (which is more applicable to systematic reviews of interventions) to include and acknowledge the various sources of evidence that may be used in a scoping review (e.g., quantitative and/or qualitative research, expert opinion, and policy document).



From: Tricco AC, Lillie E, Zarin W, O'Brien KK, Colquhoun H, Levac D, et al. PRISMA Extension for Scoping Reviews (PRISMA-ScR): Checklist and Explanation. *Ann Intern Med.* ;169:467–473. doi: 10.7326/M18-0850

For peer review only

1  
2  
3  
4  
5  
6  
7  
8  
9  
10  
11  
12  
13  
14  
15  
16  
17  
18  
19  
20  
21  
22  
23  
24  
25  
26  
27  
28  
29  
30  
31  
32  
33  
34  
35  
36  
37  
38  
39  
40  
41  
42  
43  
44  
45  
46  
47  
48  
49  
50  
51  
52  
53  
54  
55  
56  
57  
58  
59  
60



**St. Michael's**

Inspired Care.  
Inspiring Science.

For peer review only - <http://bmjopen.bmj.com/site/about/guidelines.xhtml>

# BMJ Open

## Intersectoral and integrated approaches in achieving the right to health for refugees upon resettlement: A scoping review

|                                 |                                                                                                                                                                                                                                                                                                                                                                                                                                                                                                                                                                                                                                                                                                                                                                                                                                                                |
|---------------------------------|----------------------------------------------------------------------------------------------------------------------------------------------------------------------------------------------------------------------------------------------------------------------------------------------------------------------------------------------------------------------------------------------------------------------------------------------------------------------------------------------------------------------------------------------------------------------------------------------------------------------------------------------------------------------------------------------------------------------------------------------------------------------------------------------------------------------------------------------------------------|
| Journal:                        | <i>BMJ Open</i>                                                                                                                                                                                                                                                                                                                                                                                                                                                                                                                                                                                                                                                                                                                                                                                                                                                |
| Manuscript ID                   | bmjopen-2019-029407.R2                                                                                                                                                                                                                                                                                                                                                                                                                                                                                                                                                                                                                                                                                                                                                                                                                                         |
| Article Type:                   | Research                                                                                                                                                                                                                                                                                                                                                                                                                                                                                                                                                                                                                                                                                                                                                                                                                                                       |
| Date Submitted by the Author:   | 17-May-2019                                                                                                                                                                                                                                                                                                                                                                                                                                                                                                                                                                                                                                                                                                                                                                                                                                                    |
| Complete List of Authors:       | Ho, Shirley; World Health Organization, Alliance for Health Policy and Systems Research<br>Javadi, Dena; World Health Organization, Alliance for Health Policy and Systems Research<br>Causevic, Sara; Royal Swedish Academy of Sciences, Swedish Institute for Global Health Transformation; Karolinska Institute, Global and Sexual Health, Department of Public Health Sciences<br>Langlois, Etienne V.; World Health Organization, Alliance for Health Policy and Systems Research<br>Friberg, Peter; Royal Swedish Academy of Sciences, Swedish Institute for Global Health Transformation; Sahlgrenska Academy, Institute of Medicine<br>Tomson, Göran ; Royal Swedish Academy of Sciences, Swedish Institute for Global Health Transformation; Karolinska Institute, Medical Management Centre, Department of Learning, Informatics, Management, Ethics |
| <b>Primary Subject Heading</b>: | Global health                                                                                                                                                                                                                                                                                                                                                                                                                                                                                                                                                                                                                                                                                                                                                                                                                                                  |
| Secondary Subject Heading:      | Health policy, Public health                                                                                                                                                                                                                                                                                                                                                                                                                                                                                                                                                                                                                                                                                                                                                                                                                                   |
| Keywords:                       | intersectoral, right to health, access, refugees, integration, resettlement                                                                                                                                                                                                                                                                                                                                                                                                                                                                                                                                                                                                                                                                                                                                                                                    |
|                                 |                                                                                                                                                                                                                                                                                                                                                                                                                                                                                                                                                                                                                                                                                                                                                                                                                                                                |

SCHOLARONE™  
Manuscripts

1  
2  
3 1 **Intersectoral and integrated approaches in achieving the right to health**  
4  
5 2 **for refugees upon resettlement: A scoping review**  
6  
7  
8 3  
9

10 4 Shirley Ho\*<sup>1</sup> email: shirley.ho@jhu.edu  
11 5 Dena Javadi <sup>1</sup> email: javadid@who.int  
12 6 Sara Causevic<sup>2,3</sup> email: sara.causevic@ki.se  
13 7 Etienne V. Langlois<sup>1</sup> email: langloise@who.int  
14 8 Peter Friberg<sup>2,5</sup> email: peter.friberg@mednet.gu.se  
15 9 Goran Tomson<sup>2,4</sup> email: goran.tomson@ki.se  
16  
17 10

18 11 <sup>1</sup> Alliance for Health Policy and Systems Research, World Health Organization, Avenue Appia 20, 1211 Geneva,  
19 12 Switzerland

20 13 <sup>2</sup> Swedish Institute for Global Health Transformation, SIGHT, Royal Swedish Academy of Science, Stockholm,  
21 14 Sweden

22 15 <sup>3</sup> Global and Sexual Health, Department of Public Health Sciences, Karolinska Institutet, Stockholm, Sweden

23 16 <sup>4</sup> Medical Management Centre, Department of Learning, Informatics, Management, Ethics (LIME), Karolinska  
24 17 Institutet, Stockholm, Sweden

25 18 <sup>5</sup> Institute of Medicine, Sahlgrenska Academy at Gothenburg University and Sahlgrenska University Hospital  
26 19  
27 20

28  
29 21 **\*Corresponding Author:**

30 22 Shirley Ho, shirley.ho@jhu.edu

31 23 Alliance for Health Policy and Systems Research, World Health Organization  
32 24

33  
34  
35 25 **Keywords:** intersectoral, right to health, access, refugees, integration, resettlement  
36  
37 26  
38

39 27 Word count: 4,041  
40  
41  
42  
43  
44  
45  
46  
47  
48  
49  
50  
51  
52  
53  
54  
55  
56  
57  
58  
59  
60

1  
2  
3 28 **ABSTRACT (285/300)**  
4

5 29 **Background:** Better understanding, documentation, and evaluation of different refugee health  
6  
7 30 interventions, and their means of health system integration and intersectoral collaboration are needed

8  
9 31 **Objectives:** Explore the barriers and facilitators to the integration of health services for refugees; the  
10  
11 32 processes involved; and the different stakeholders engaged in leveraging intersectoral approaches to  
12  
13 33 protect refugees' right to health on resettlement

14 34 **Design:** Scoping review

15  
16 35 **Methods:** A search of articles from 2000 onward was done in MEDLINE, Web of Science, Global  
17  
18 36 Health, and PsycInfo Embase. Two frameworks were applied in our analysis, the "Framework for  
19  
20 37 analyzing integration of targeted health interventions in systems", and "Health in All Policies"  
21  
22 38 framework for country action. A comprehensive description of the methods is included in our  
23  
24 39 published protocol.

25 40 **Results:** 6,117 papers were identified, only 18 studies met the inclusion criteria. Facilitators in  
26  
27 41 implementation included: training for providers; colocation of services; transportation services to  
28  
29 42 enhance access; clear role definitions; and appropriate budget allocation and financing. Barriers  
30  
31 43 included: lack of a participatory approach; insufficient resources for providers; absence of  
32  
33 44 financing; unclear roles and insufficient coordination of interprofessional teams; low availability  
34  
35 45 and use of data; and turf wars across governance stakeholders. Successful strategies to address  
36  
37 46 refugee health included: networks of service delivery combining existing public and private  
38  
39 47 services; system navigators; host community engagement to reduce stigma; translation services;  
40  
41 48 legislative support; and alternative models of care for women and children.

42 49 **Conclusion:** Limited evidence was found overall. Further research on intersectoral approaches is  
43  
44 50 needed. Key policy insights gained from barriers and facilitators reported in available studies  
45  
46 51 include: improving coordination between existing programs; supporting colocation of services;  
47  
48 52 establishing formal system navigator roles that connect relevant programs; establishing formal  
49  
50 53 translation services to improve access; and establishing training and resources for providers.

51 54  
52 55 **Registration:** Registered on Open Science Framework at <https://osf.io/gt9ck/>  
53  
54 56  
55 57

## 58 **Strengths and limitations of this study**

- 59 • Our study uses a systematic approach by using two frameworks, the “Framework for  
60 analyzing integration of targeted health interventions in systems”, and “Health in All  
61 Policies” framework for country action to develop a strong evidence base in  
62 understanding the processes and actors involved in integration and intersectoral action
- 63 • Our findings can be applied for policy and action aiming to enhance the integration of  
64 refugee health services within health systems, and identifying research needs to advance  
65 the right to health for refugees
- 66 • The lack of evidence on intersectoral and integrated approaches from low-income and  
67 middle-income countries may impact the generalizability of the findings

## 68 **INTRODUCTION**

69 Upholding the right to health is a fundamental challenge for governments worldwide,  
70 particularly when providing services to vulnerable or hard to reach populations such as refugees.  
71 The Office of the United Nations High Commission for Human Rights (OHCHR) identifies the  
72 right to health as a fundamental part of human rights, first articulated in the 1946 Constitution of  
73 the World Health Organization (WHO).<sup>1</sup> Entitlements under the right to health include universal  
74 health coverage – now a target under Sustainable Development Goal (SDG) 3 – broadly covering  
75 access to preventative and curative services, essential medicines, timely basic health services,  
76 health-related education, participation in health-related decision making at both national and  
77 community levels, as well as financial protection.<sup>1,2</sup> Especially relevant to the plight of refugees,  
78 the right to health includes non-discrimination whereby health services, commodities and  
79 facilities must be provided to all without any discrimination. Lastly, these health services must

1  
2  
3 80 be accessible, medically and culturally appropriate, available in adequate amount and quality,  
4  
5 81 which includes having a trained health workforce, safe products and sanitation.<sup>2</sup>  
6  
7

8 82 “Refugees” are individuals fleeing armed conflict or persecution as defined by the 1951  
9  
10 83 Refugee Convention which also identifies their basic rights, specifically that refugees should not  
11  
12 84 be returned to situations that are deemed a threat to their life or freedom.<sup>3</sup> A key distinction of  
13  
14 85 refugee rights is that they are not only a matter of national legislation, but also of international  
15  
16 86 law.<sup>4</sup> Despite these legal protections, refugees face many challenges in accessing health services,  
17  
18 87 especially more vulnerable groups like women and children.<sup>5</sup> Many states explicitly exclude  
19  
20 88 refugees from the level of protection afforded to their citizens, instead choosing to offer  
21  
22 89 “essential care” or “emergency health care,” which is differentially defined across countries.<sup>6</sup>  
23  
24 90 The Committee on the Elimination of Racial Discrimination, and the Committee on Economic,  
25  
26 91 Social and Cultural Rights, both include general statements that hold States accountable to “the  
27  
28 92 right of non-citizens to an adequate standard of physical and mental health by, inter alia,  
29  
30 93 refraining from denying or limiting their access to preventive, curative and palliative health  
31  
32 94 services”.<sup>7</sup> The increasing number of refugees over the past years makes the realization and  
33  
34 95 protection of these rights both a legal, ethical and a logistical challenge.<sup>5</sup> In addition, the  
35  
36 96 boundaries of the right to health have expanded due to increased understanding of social  
37  
38 97 determinants of health and the health impacts of the lived environment.<sup>8,9</sup> Refugees face  
39  
40 98 challenges in navigating health, legal, education, housing, social protection and employment  
41  
42 99 services, which further threatens their quality of life and health status.<sup>10</sup> Therefore, a lack of  
43  
44 100 coordination and integration across these services undermines their effectiveness.<sup>11</sup>  
45  
46  
47  
48  
49

50  
51 101 Much like the shift from the more vertical approaches of the millennium development  
52  
53 102 goals (MDGs) towards the more integrated SDGs, the protection of the right to health calls for an  
54  
55  
56  
57  
58  
59  
60



1  
2  
3 103 intersectoral approach whereby health is applied to all policies for all people.<sup>12</sup> As such, for  
4  
5 104 states to effectively protect the right to health for refugees there is a need to work across sectors  
6  
7  
8 105 and disciplines to better integrate targeted programs and initiatives, thereby improving standards  
9  
10 106 of care during resettlement. Some evidence exists that supporting collaboration and coordination  
11  
12 107 across social services for refugees improves the effectiveness and quality of care received.<sup>10</sup>  
13  
14 108 Many fragmented psychosocial programs exist across sectors to attempt to address the unique  
15  
16  
17 109 challenges faced by refugees but these are largely unevaluated and lack sustainability.<sup>13,14</sup> Better  
18  
19 110 understanding, documentation, evaluation and reporting of the dynamic nature of different  
20  
21 111 interventions, and their means of health system integration and intersectoral collaboration, are  
22  
23  
24 112 necessary to ensure that lessons learned are implemented in the design of future policies and  
25  
26 113 programs.

27  
28 114 Therefore, we conducted a scoping review that describes the barriers and facilitators to  
29  
30  
31 115 integrated health services for refugees; the process involved in protecting refugee health; and the  
32  
33 116 different stakeholders engaged in leveraging intersectoral approaches to protect refugees' right to  
34  
35 117 health on resettlement. We focused on three specific research questions:

- 36  
37  
38 118 (1) What are the barriers and facilitators in integrating targeted services for refugees within  
39  
40 119 existing health systems?  
41  
42 120 (2) What strategies are involved in addressing refugees' right to health upon resettlement?  
43  
44  
45 121 (3) Which stakeholders are involved in leveraging intersectoral approaches to protect  
46  
47 122 refugees' right to health?  
48

49 123

50  
51 124

52  
53  
54 125

## 126 **METHODS**

### 127 **Study Design**

128 We selected the scoping review method as we were interested in mapping the concepts relevant  
129 to the complex nature of this topic, the changing global landscape around it, and the emerging  
130 and diverse knowledge-base, which makes the method well-matched to our research  
131 objectives.<sup>15,16</sup> We drafted a scoping review protocol following the methods outlined by the  
132 Joanna Briggs Institute Methods Manual for scoping reviews.<sup>17</sup> Our protocol was registered with  
133 the Open Science Framework,<sup>18</sup> and published in BMJ Open.<sup>19</sup> Since our full methods are  
134 available in the published protocol, a summary is provided below.<sup>19</sup>

### 135 **Information Sources and Search Strategy**

136 A search of articles was done by two experienced librarians at the Karolinska Institutet using the  
137 following electronic databases: MEDLINE, Web of Science, Global Health, and PsycInfo  
138 Embase. See Appendix I for the comprehensive search strategy. Search terms included umbrella  
139 terms for three topics: refugees (eg. immigrants, migrants, asylum seekers, transients); health and  
140 social services (eg. healthcare, patient experience, health services, interdisciplinary, intersectoral  
141 collaboration, access to care); and health equity (eg. disparities, social determinants, rights-based  
142 approaches). These were combined to comprise the search (detailed search terms in appendix).

### 143 **Eligibility Criteria**

144 **Population:** Refugees as defined by the 1951 Refugee Convention<sup>3</sup>

145 **Intervention:** A program, approach or technical innovation that aims to protect refugees' right to  
146 health, including interventions aimed at addressing the social determinants of health.  
147 Interventions outside of the health sector that affect health were included.

1  
2  
3 148 **Comparators:** This component was not necessary as the focus was on gauging the state of  
4  
5 149 evidence.

7 150 **Outcomes:** Eligible studies and papers include those discussing plans for action, strategies,  
8  
9 151 barriers, facilitators or outcomes using an intersectoral approach.

12 152 **Types of Studies Included:** Randomized control trials, pre-post design evaluations, qualitative  
13  
14 153 evaluations, and economic evaluations were included. Further, implementation research and  
15  
16 154 operations research studies were eligible for inclusion, as well as studies or reports outlining  
17  
18 155 stakeholder experiences and plans.

21 156 **Exclusion Criteria:** Papers published in a language other than English were excluded. Other  
22  
23 157 categories of migrants were not included as their legal entitlements are different to those of  
24  
25 158 refugees which are protected under international law. If the studies did not display some level of  
26  
27 159 integration nor intersectorality, they were not assessed further.<sup>20</sup> Studies or commentaries that  
28  
29 160 solely discuss theories and conceptual models were excluded.

33 161 **Time Period:** Only studies from 2000 onward have been included.

35 162 **Setting:** Eligible studies are set in countries receiving refugees and asylum seekers (who may  
36  
37 163 eventually qualify for refugee status) and serving as hosts for resettlement.

#### 41 164 **Frameworks to Address Research Questions**

43 165 Two published frameworks were used in our analysis to understand integration of health services  
44  
45 166 within health systems and to analyze intersectoral approaches to support these services. The first  
46  
47 167 framework by Atun et al (2010)<sup>21</sup>, is a tool for analyzing integration of targeted health  
48  
49 168 interventions in health systems, where integration is defined as “the extent, pattern, and rate of  
50  
51 169 adoption and eventual assimilation of health interventions into each of the critical functions of a  
52  
53  
54  
55  
56  
57  
58  
59  
60

1  
2  
3 170 health system".<sup>21</sup> The framework for integration was also used to assess the process, and actors  
4  
5 171 involved in integration.<sup>20</sup>  
6

7  
8 172 The second framework applied in our analysis is that of the Health in All Policies (HiAP)  
9  
10 173 framework for country action. HiAP is defined as a way for countries to protect population  
11  
12 174 health through "an approach to public policies across sectors that systematically takes into  
13  
14 175 account the health implications of decisions, seeks synergies, and avoids harmful health impacts  
15  
16 176 in order to improve population health and health equity".<sup>22</sup> Components of this framework,  
17  
18 177 adapted to refugee needs, were used in the review to frame barriers and facilitators in integrating  
19  
20 178 refugee services through intersectoral collaboration.  
21  
22

### 23 24 179 **Data Abstraction**

25  
26 180 A data abstraction chart was developed based on the two frameworks used in this study. The  
27  
28 181 chart was tested by two researchers and revised as appropriate. The revised chart was used by the  
29  
30 182 same researchers to abstract descriptive and qualitative data as relevant to the elements of the  
31  
32 183 frameworks used. Elements included in the chart were: intervention description; barriers and  
33  
34 184 facilitators; contextual details; target population; type of evaluation; outcomes; stakeholder  
35  
36 185 involvement in governance, financing, planning, service delivery, monitoring and evaluation,  
37  
38 186 and engagement. Deductive reasoning was used to identify barriers and facilitators in  
39  
40 187 intersectoral collaboration for refugee health. Open coding was applied to visualize themes  
41  
42 188 across interventions as well as barriers and facilitators.<sup>23</sup> Axial coding was applied to then draw  
43  
44 189 connections to enabling strategies for intersectoral collaboration.<sup>23</sup> General conclusions were  
45  
46 190 drawn based on these themes, leading to suggestions for strengthening programs and policies.  
47  
48  
49  
50

### 51 191 **Patient and Public Involvement**

52  
53  
54 192 There was no patient or public involvement required in conducting this scoping review.  
55  
56  
57  
58  
59  
60

## 193 RESULTS

194 Of the 6,117 records identified through the search strategy, 1302 abstracts were screened after  
 195 removing duplicates. 1141 were excluded based on exclusion criteria described above as  
 196 assessed by two independent reviewers, 131 full texts were assessed, with the references of 15  
 197 selected articles additionally screened for inclusion criteria, a total of 18 studies were included in  
 198 our review (see Figure 1). Five studies were programs or interventions carried out in the United  
 199 States of America (USA), one in Australia, two in Canada, one in Ethiopia and Uganda, and one  
 200 in each of the following: Italy, Lebanon, Mexico, the Netherlands, New Zealand, Spain and the  
 201 United Kingdom (UK) (See Table 1). Six studies were interventions at the district/local level,  
 202 four at a broader regional level and five at the national level. The interventions outlined in the  
 203 included studies addressed mostly all genders and all age ranges with the exception of six that  
 204 targeted vulnerable groups: two studies on mothers and children;<sup>24,25</sup> one on the elderly;<sup>26</sup> one on  
 205 students;<sup>27</sup> and two on women and girls.<sup>28,29</sup> Interventions targeting women and children in  
 206 particular used alternative models of care such as mobile health clinics,<sup>28,29</sup> and school-based  
 207 interventions.<sup>24,27</sup> Seven studies applied qualitative approaches (primarily in-depth interviews)  
 208 for evaluation,<sup>27–33</sup> four studies used survey tools or standardized assessment tools;<sup>25,26,34,35</sup> four  
 209 studies used descriptive and routine data;<sup>24,36–38</sup> and three studies were mainly descriptive  
 210 analysis reporting on and looking at the outcomes of case examples and policies.<sup>39–41</sup>

211 **Table 1. Summary of Included Studies**

| Author                    | Year | Title                                                                                                                                         | Intervention                                                                              | Barriers                                                                                                                | Facilitators                                                                                                                                                                                               | Country |
|---------------------------|------|-----------------------------------------------------------------------------------------------------------------------------------------------|-------------------------------------------------------------------------------------------|-------------------------------------------------------------------------------------------------------------------------|------------------------------------------------------------------------------------------------------------------------------------------------------------------------------------------------------------|---------|
| Calvo et al <sup>30</sup> | 2014 | The Effect of Universal Service Delivery on the Integration of Moroccan Immigrants in Spain: A Case Study from an Anti-Oppressive Perspective | Addressing stigma & host community perceptions; system navigator (intercultural mediator) | Minimal involvement of target community in design of program; considerations of forced assimilation through integration | Decreased prejudice due to increased contact between host and immigrant communities; clear communication to host community around allocation of resources thereby reducing perceived threat of competition | Spain   |

|    |                                   |      |                                                                                                           |                                                                                                                                                                                         |                                                                                                                                                 |                                                                                                                                                                                                                                                                                                                            |        |
|----|-----------------------------------|------|-----------------------------------------------------------------------------------------------------------|-----------------------------------------------------------------------------------------------------------------------------------------------------------------------------------------|-------------------------------------------------------------------------------------------------------------------------------------------------|----------------------------------------------------------------------------------------------------------------------------------------------------------------------------------------------------------------------------------------------------------------------------------------------------------------------------|--------|
| 1  |                                   |      |                                                                                                           |                                                                                                                                                                                         |                                                                                                                                                 |                                                                                                                                                                                                                                                                                                                            |        |
| 2  |                                   |      |                                                                                                           |                                                                                                                                                                                         |                                                                                                                                                 |                                                                                                                                                                                                                                                                                                                            |        |
| 3  | <b>Catarci<sup>34</sup></b>       | 2012 | Conceptions and Strategies for User Integration across Refugee Services in Italy                          | Integrated reception of refugees and asylum seekers (network of hospitals and health services, public employment services, vocational training and continuing education agencies, etc.) | Service coordinators lack tools to support integrated services; lack of continuity between theory and practice in continuing education support  | Service coordinators with access to continuing education were more likely to report adequate support; continuing education with intimate knowledge of the context, user needs, and legislation related to refugee inclusion; coordinators should also have a solid network and an ability to distinguish between resources | Italy  |
| 4  |                                   |      |                                                                                                           |                                                                                                                                                                                         |                                                                                                                                                 |                                                                                                                                                                                                                                                                                                                            |        |
| 5  |                                   |      |                                                                                                           |                                                                                                                                                                                         |                                                                                                                                                 |                                                                                                                                                                                                                                                                                                                            |        |
| 6  |                                   |      |                                                                                                           |                                                                                                                                                                                         |                                                                                                                                                 |                                                                                                                                                                                                                                                                                                                            |        |
| 7  |                                   |      |                                                                                                           |                                                                                                                                                                                         |                                                                                                                                                 |                                                                                                                                                                                                                                                                                                                            |        |
| 8  |                                   |      |                                                                                                           |                                                                                                                                                                                         |                                                                                                                                                 |                                                                                                                                                                                                                                                                                                                            |        |
| 9  |                                   |      |                                                                                                           |                                                                                                                                                                                         |                                                                                                                                                 |                                                                                                                                                                                                                                                                                                                            |        |
| 10 |                                   |      |                                                                                                           |                                                                                                                                                                                         |                                                                                                                                                 |                                                                                                                                                                                                                                                                                                                            |        |
| 11 |                                   |      |                                                                                                           |                                                                                                                                                                                         |                                                                                                                                                 |                                                                                                                                                                                                                                                                                                                            |        |
| 12 |                                   |      |                                                                                                           |                                                                                                                                                                                         |                                                                                                                                                 |                                                                                                                                                                                                                                                                                                                            |        |
| 13 |                                   |      |                                                                                                           |                                                                                                                                                                                         |                                                                                                                                                 |                                                                                                                                                                                                                                                                                                                            |        |
| 14 |                                   |      |                                                                                                           |                                                                                                                                                                                         |                                                                                                                                                 |                                                                                                                                                                                                                                                                                                                            |        |
| 15 |                                   |      |                                                                                                           |                                                                                                                                                                                         |                                                                                                                                                 |                                                                                                                                                                                                                                                                                                                            |        |
| 16 |                                   |      |                                                                                                           |                                                                                                                                                                                         |                                                                                                                                                 |                                                                                                                                                                                                                                                                                                                            |        |
| 17 | <b>Cowell et al<sup>25</sup></b>  | 2009 | Clinical Trail Outcomes of the Mexican American Problem Solving Program (MAPS)                            | A cognitively based problem solving program delivered on linked home visits to mothers and after school program classes to children                                                     | Difficulty managing case load by school nurse of home visits and classes                                                                        | Communication and engagement with the community; partnership with the school                                                                                                                                                                                                                                               | USA    |
| 18 |                                   |      |                                                                                                           |                                                                                                                                                                                         |                                                                                                                                                 |                                                                                                                                                                                                                                                                                                                            |        |
| 19 |                                   |      |                                                                                                           |                                                                                                                                                                                         |                                                                                                                                                 |                                                                                                                                                                                                                                                                                                                            |        |
| 20 |                                   |      |                                                                                                           |                                                                                                                                                                                         |                                                                                                                                                 |                                                                                                                                                                                                                                                                                                                            |        |
| 21 |                                   |      |                                                                                                           |                                                                                                                                                                                         |                                                                                                                                                 |                                                                                                                                                                                                                                                                                                                            |        |
| 22 |                                   |      |                                                                                                           |                                                                                                                                                                                         |                                                                                                                                                 |                                                                                                                                                                                                                                                                                                                            |        |
| 23 |                                   |      |                                                                                                           |                                                                                                                                                                                         |                                                                                                                                                 |                                                                                                                                                                                                                                                                                                                            |        |
| 24 |                                   |      |                                                                                                           |                                                                                                                                                                                         |                                                                                                                                                 |                                                                                                                                                                                                                                                                                                                            |        |
| 25 | <b>Geltman et al<sup>38</sup></b> | 2005 | A Private-Sector Preferred Provider Network Model for Public Health Screening of Newly Resettled Refugees | Public-private partnerships using a preferred provider network model for conducting refugee health screening                                                                            | Lack of appropriate funding model leading to delays in health screening                                                                         | Funding streams approved allowed procurement of services; network of providers created; dedicated training of physicians within the network                                                                                                                                                                                | USA    |
| 26 |                                   |      |                                                                                                           |                                                                                                                                                                                         |                                                                                                                                                 |                                                                                                                                                                                                                                                                                                                            |        |
| 27 |                                   |      |                                                                                                           |                                                                                                                                                                                         |                                                                                                                                                 |                                                                                                                                                                                                                                                                                                                            |        |
| 28 |                                   |      |                                                                                                           |                                                                                                                                                                                         |                                                                                                                                                 |                                                                                                                                                                                                                                                                                                                            |        |
| 29 |                                   |      |                                                                                                           |                                                                                                                                                                                         |                                                                                                                                                 |                                                                                                                                                                                                                                                                                                                            |        |
| 30 |                                   |      |                                                                                                           |                                                                                                                                                                                         |                                                                                                                                                 |                                                                                                                                                                                                                                                                                                                            |        |
| 31 |                                   |      |                                                                                                           |                                                                                                                                                                                         |                                                                                                                                                 |                                                                                                                                                                                                                                                                                                                            |        |
| 32 |                                   |      |                                                                                                           |                                                                                                                                                                                         |                                                                                                                                                 |                                                                                                                                                                                                                                                                                                                            |        |
| 33 | <b>Guruge et al<sup>29</sup></b>  | 2010 | Immigrant women's experiences of receiving care in a mobile health clinic                                 | Mobile health clinic for reproductive health services for immigrant women                                                                                                               | Lack of awareness of available services and navigating health systems; language barrier; fear of deportation leading to lack of use of services | Colocation of services due to the mobile nature of the clinic                                                                                                                                                                                                                                                              | Canada |
| 34 |                                   |      |                                                                                                           |                                                                                                                                                                                         |                                                                                                                                                 |                                                                                                                                                                                                                                                                                                                            |        |
| 35 |                                   |      |                                                                                                           |                                                                                                                                                                                         |                                                                                                                                                 |                                                                                                                                                                                                                                                                                                                            |        |
| 36 |                                   |      |                                                                                                           |                                                                                                                                                                                         |                                                                                                                                                 |                                                                                                                                                                                                                                                                                                                            |        |
| 37 |                                   |      |                                                                                                           |                                                                                                                                                                                         |                                                                                                                                                 |                                                                                                                                                                                                                                                                                                                            |        |
| 38 |                                   |      |                                                                                                           |                                                                                                                                                                                         |                                                                                                                                                 |                                                                                                                                                                                                                                                                                                                            |        |
| 39 |                                   |      |                                                                                                           |                                                                                                                                                                                         |                                                                                                                                                 |                                                                                                                                                                                                                                                                                                                            |        |
| 40 |                                   |      |                                                                                                           |                                                                                                                                                                                         |                                                                                                                                                 |                                                                                                                                                                                                                                                                                                                            |        |
| 41 | <b>Kim et al<sup>36</sup></b>     | 2002 | Primary health care for Korean immigrants: sustaining a culturally sensitive model                        | Translation support; integrated health and social care; mental health support; bilingual advanced nurse practitioner and community advocate serve as system navigators                  | Budgetary restrictions; existing restrictions in the roles that nurses can play in outreach                                                     | Effective communication around availability of new program; effective communication to announce new outreach and navigation role; efforts to build consensus and coherence across interprofessional teams; clear articulation of the role of advance nurse practitioners and their complementary role                      | USA    |
| 42 |                                   |      |                                                                                                           |                                                                                                                                                                                         |                                                                                                                                                 |                                                                                                                                                                                                                                                                                                                            |        |
| 43 |                                   |      |                                                                                                           |                                                                                                                                                                                         |                                                                                                                                                 |                                                                                                                                                                                                                                                                                                                            |        |
| 44 |                                   |      |                                                                                                           |                                                                                                                                                                                         |                                                                                                                                                 |                                                                                                                                                                                                                                                                                                                            |        |
| 45 |                                   |      |                                                                                                           |                                                                                                                                                                                         |                                                                                                                                                 |                                                                                                                                                                                                                                                                                                                            |        |
| 46 |                                   |      |                                                                                                           |                                                                                                                                                                                         |                                                                                                                                                 |                                                                                                                                                                                                                                                                                                                            |        |
| 47 |                                   |      |                                                                                                           |                                                                                                                                                                                         |                                                                                                                                                 |                                                                                                                                                                                                                                                                                                                            |        |
| 48 |                                   |      |                                                                                                           |                                                                                                                                                                                         |                                                                                                                                                 |                                                                                                                                                                                                                                                                                                                            |        |
| 49 |                                   |      |                                                                                                           |                                                                                                                                                                                         |                                                                                                                                                 |                                                                                                                                                                                                                                                                                                                            |        |
| 50 |                                   |      |                                                                                                           |                                                                                                                                                                                         |                                                                                                                                                 |                                                                                                                                                                                                                                                                                                                            |        |
| 51 |                                   |      |                                                                                                           |                                                                                                                                                                                         |                                                                                                                                                 |                                                                                                                                                                                                                                                                                                                            |        |
| 52 |                                   |      |                                                                                                           |                                                                                                                                                                                         |                                                                                                                                                 |                                                                                                                                                                                                                                                                                                                            |        |
| 53 |                                   |      |                                                                                                           |                                                                                                                                                                                         |                                                                                                                                                 |                                                                                                                                                                                                                                                                                                                            |        |
| 54 |                                   |      |                                                                                                           |                                                                                                                                                                                         |                                                                                                                                                 |                                                                                                                                                                                                                                                                                                                            |        |
| 55 |                                   |      |                                                                                                           |                                                                                                                                                                                         |                                                                                                                                                 |                                                                                                                                                                                                                                                                                                                            |        |
| 56 |                                   |      |                                                                                                           |                                                                                                                                                                                         |                                                                                                                                                 |                                                                                                                                                                                                                                                                                                                            |        |
| 57 |                                   |      |                                                                                                           |                                                                                                                                                                                         |                                                                                                                                                 |                                                                                                                                                                                                                                                                                                                            |        |
| 58 |                                   |      |                                                                                                           |                                                                                                                                                                                         |                                                                                                                                                 |                                                                                                                                                                                                                                                                                                                            |        |
| 59 |                                   |      |                                                                                                           |                                                                                                                                                                                         |                                                                                                                                                 |                                                                                                                                                                                                                                                                                                                            |        |
| 60 |                                   |      |                                                                                                           |                                                                                                                                                                                         |                                                                                                                                                 |                                                                                                                                                                                                                                                                                                                            |        |

1  
2  
3  
4  
5  
6  
7  
8  
9  
10  
11  
12  
13  
14  
15  
16  
17  
18  
19  
20  
21  
22  
23  
24  
25  
26  
27  
28  
29  
30  
31  
32  
33  
34  
35  
36  
37  
38  
39  
40  
41  
42  
43  
44  
45  
46  
47  
48  
49  
50  
51  
52  
53  
54  
55  
56  
57  
58  
59  
60

|                                      |      |                                                                                                                                     |                                                                                                                                                                                                                                                       |                                                                                                                                                                                                                                                                  |                                                                                                                                                                                                                       |             |
|--------------------------------------|------|-------------------------------------------------------------------------------------------------------------------------------------|-------------------------------------------------------------------------------------------------------------------------------------------------------------------------------------------------------------------------------------------------------|------------------------------------------------------------------------------------------------------------------------------------------------------------------------------------------------------------------------------------------------------------------|-----------------------------------------------------------------------------------------------------------------------------------------------------------------------------------------------------------------------|-------------|
| <b>Lilleston et al<sup>28</sup></b>  | 2018 | Evaluation of a mobile approach to gender-based violence service delivery among Syrian refugees in Lebanon                          | GBV mobile support service, providing safe spaces, community outreach, psychosocial support activities, safe legal and medical referrals, survivor-approach, adherence to confidentiality, and access to face-to-face and phone-based case management | Trust-building is a key element and so constant mobility of target audience presented a challenge as did referral of services as quality medical and legal services were not always safe or available                                                            | Integration of legal and medical teams in mobile GBV support teams; community mobilizers/system navigator role is a key function                                                                                      | Lebanon     |
| <b>Macfarlane et al<sup>33</sup></b> | 2009 | Language barriers in health and social care consultations in the community: A comparative study of responses in Ireland and England | Translation support                                                                                                                                                                                                                                   | Use of unpaid interpreters from patients' social networks is complex; only one accredited course for professional interpreters; use of professional interpreters patchy due to low quality and institutional challenges in their acquisition                     | In England where there is a policy to use language services (Race Equality Policy), there is more use than in Ireland but implementation remains poor                                                                 | UK          |
| <b>McMurray et al<sup>35</sup></b>   | 2014 | Integrated Primary Care Improves Access to Healthcare for Newly Arrived Refugees in Canada                                          | Translation support; integrated health and social care; Gateway services and system navigators                                                                                                                                                        | Shortage of primary care physicians which is the gateway; bureaucracy when billing Canada's Interim Federal Health Program (IFHP) that provides coverage for health care costs until provincial health insurance is available                                    | Relationships between local physician community and case workers (navigators); timely transfer of records; ongoing consultations post-transfer                                                                        | Canada      |
| <b>McNaughton et al<sup>24</sup></b> | 2010 | Directions for Refining a School Nursing Intervention for Mexican Immigrant Families                                                | Active case finding and problem solving through education system (school nurses); translation support                                                                                                                                                 | Schools with no existing nursing outreach program were difficult to start at                                                                                                                                                                                     | Nursing role was recognized and accepted by immigrant communities; schools that had a nursing program already could expand it to active case finding with immigrant families                                          | Mexico      |
| <b>Mortensen<sup>31</sup></b>        | 2011 | Public Health System Responsiveness To Refugee Groups In New Zealand: Activation From The Bottom Up                                 | Physician-driven needs-based programs in primary care                                                                                                                                                                                                 | Mismatch between policies at national vs. local level; lack of demographic data; no long-term planning or projected needs; low linkages between district health branch, public health offices, and NGOs; low health literacy due to lack of translated materials | Quota refugees have same access to services as host communities; local action activated by physicians and community leaders led to more coverage and higher quality services in specific areas that had more advocacy | New Zealand |

|    |                                    |      |                                                                                                                                                                               |                                                                                                                                                            |                                                                                                                                                                                                                                                                                                                                                                            |                                                                                                                                                              |                   |
|----|------------------------------------|------|-------------------------------------------------------------------------------------------------------------------------------------------------------------------------------|------------------------------------------------------------------------------------------------------------------------------------------------------------|----------------------------------------------------------------------------------------------------------------------------------------------------------------------------------------------------------------------------------------------------------------------------------------------------------------------------------------------------------------------------|--------------------------------------------------------------------------------------------------------------------------------------------------------------|-------------------|
| 1  |                                    |      |                                                                                                                                                                               |                                                                                                                                                            |                                                                                                                                                                                                                                                                                                                                                                            |                                                                                                                                                              |                   |
| 2  |                                    |      |                                                                                                                                                                               |                                                                                                                                                            |                                                                                                                                                                                                                                                                                                                                                                            |                                                                                                                                                              |                   |
| 3  | <b>Philbin et al<sup>40</sup></b>  | 2018 | State-level immigration and immigrant-focused policies as drivers of Latino health disparities in the United States                                                           | Policies to address social and legal determinants of health as they relate to immigrant populations                                                        | Exclusionary policies affect social determinants of health, especially in mixed status families; families unwilling to participate in social programs due to fear and confusion over entitlements; structural racism; restrictions in accessing education and employment; low mobility and relocation to remote areas with low availability of integrated social services. | Elimination of waiting period in several states for access to Medicaid regardless of immigration status; extra funding to federally qualified health centres | USA               |
| 4  |                                    |      |                                                                                                                                                                               |                                                                                                                                                            |                                                                                                                                                                                                                                                                                                                                                                            |                                                                                                                                                              |                   |
| 5  |                                    |      |                                                                                                                                                                               |                                                                                                                                                            |                                                                                                                                                                                                                                                                                                                                                                            |                                                                                                                                                              |                   |
| 6  |                                    |      |                                                                                                                                                                               |                                                                                                                                                            |                                                                                                                                                                                                                                                                                                                                                                            |                                                                                                                                                              |                   |
| 7  |                                    |      |                                                                                                                                                                               |                                                                                                                                                            |                                                                                                                                                                                                                                                                                                                                                                            |                                                                                                                                                              |                   |
| 8  |                                    |      |                                                                                                                                                                               |                                                                                                                                                            |                                                                                                                                                                                                                                                                                                                                                                            |                                                                                                                                                              |                   |
| 9  |                                    |      |                                                                                                                                                                               |                                                                                                                                                            |                                                                                                                                                                                                                                                                                                                                                                            |                                                                                                                                                              |                   |
| 10 |                                    |      |                                                                                                                                                                               |                                                                                                                                                            |                                                                                                                                                                                                                                                                                                                                                                            |                                                                                                                                                              |                   |
| 11 |                                    |      |                                                                                                                                                                               |                                                                                                                                                            |                                                                                                                                                                                                                                                                                                                                                                            |                                                                                                                                                              |                   |
| 12 |                                    |      |                                                                                                                                                                               |                                                                                                                                                            |                                                                                                                                                                                                                                                                                                                                                                            |                                                                                                                                                              |                   |
| 13 |                                    |      |                                                                                                                                                                               |                                                                                                                                                            |                                                                                                                                                                                                                                                                                                                                                                            |                                                                                                                                                              |                   |
| 14 |                                    |      |                                                                                                                                                                               |                                                                                                                                                            |                                                                                                                                                                                                                                                                                                                                                                            |                                                                                                                                                              |                   |
| 15 |                                    |      |                                                                                                                                                                               |                                                                                                                                                            |                                                                                                                                                                                                                                                                                                                                                                            |                                                                                                                                                              |                   |
| 16 |                                    |      |                                                                                                                                                                               |                                                                                                                                                            |                                                                                                                                                                                                                                                                                                                                                                            |                                                                                                                                                              |                   |
| 17 |                                    |      |                                                                                                                                                                               |                                                                                                                                                            |                                                                                                                                                                                                                                                                                                                                                                            |                                                                                                                                                              |                   |
| 18 |                                    |      |                                                                                                                                                                               |                                                                                                                                                            |                                                                                                                                                                                                                                                                                                                                                                            |                                                                                                                                                              |                   |
| 19 | <b>Stewart et al<sup>32</sup></b>  | 2008 | Multicultural Meanings of Social Support among Immigrants and Refugees                                                                                                        | Policies to address social and legal determinants of health as they relate to immigrant populations; social networking                                     | Inadequate financial and human resources, limited agency mandates, ineffective collaboration with other sectors, and low staff morale; collaboration impeded by the volume of organizations involved                                                                                                                                                                       | Existing networks of longer term immigrants were supportive in overcoming access barriers                                                                    | Canada            |
| 20 |                                    |      |                                                                                                                                                                               |                                                                                                                                                            |                                                                                                                                                                                                                                                                                                                                                                            |                                                                                                                                                              |                   |
| 21 |                                    |      |                                                                                                                                                                               |                                                                                                                                                            |                                                                                                                                                                                                                                                                                                                                                                            |                                                                                                                                                              |                   |
| 22 |                                    |      |                                                                                                                                                                               |                                                                                                                                                            |                                                                                                                                                                                                                                                                                                                                                                            |                                                                                                                                                              |                   |
| 23 |                                    |      |                                                                                                                                                                               |                                                                                                                                                            |                                                                                                                                                                                                                                                                                                                                                                            |                                                                                                                                                              |                   |
| 24 |                                    |      |                                                                                                                                                                               |                                                                                                                                                            |                                                                                                                                                                                                                                                                                                                                                                            |                                                                                                                                                              |                   |
| 25 |                                    |      |                                                                                                                                                                               |                                                                                                                                                            |                                                                                                                                                                                                                                                                                                                                                                            |                                                                                                                                                              |                   |
| 26 |                                    |      |                                                                                                                                                                               |                                                                                                                                                            |                                                                                                                                                                                                                                                                                                                                                                            |                                                                                                                                                              |                   |
| 27 |                                    |      |                                                                                                                                                                               |                                                                                                                                                            |                                                                                                                                                                                                                                                                                                                                                                            |                                                                                                                                                              |                   |
| 28 |                                    |      |                                                                                                                                                                               |                                                                                                                                                            |                                                                                                                                                                                                                                                                                                                                                                            |                                                                                                                                                              |                   |
| 29 | <b>Tuepker et al<sup>41</sup></b>  | 2009 | Evaluating integrated healthcare for refugees and hosts in an African context                                                                                                 | Integrating host and refugee healthcare by reorganizing ministries to incorporate refugee services into existing portfolios rather than under one ministry | Lack of evidence on the added value of integrated care; concern around minimizing exceptional status of refugees; no legal obligation to provide integrated care; turf wars across organizations and sectors                                                                                                                                                               | Funding streams from international organizations to national health services                                                                                 | Ethiopia & Uganda |
| 30 |                                    |      |                                                                                                                                                                               |                                                                                                                                                            |                                                                                                                                                                                                                                                                                                                                                                            |                                                                                                                                                              |                   |
| 31 |                                    |      |                                                                                                                                                                               |                                                                                                                                                            |                                                                                                                                                                                                                                                                                                                                                                            |                                                                                                                                                              |                   |
| 32 |                                    |      |                                                                                                                                                                               |                                                                                                                                                            |                                                                                                                                                                                                                                                                                                                                                                            |                                                                                                                                                              |                   |
| 33 |                                    |      |                                                                                                                                                                               |                                                                                                                                                            |                                                                                                                                                                                                                                                                                                                                                                            |                                                                                                                                                              |                   |
| 34 |                                    |      |                                                                                                                                                                               |                                                                                                                                                            |                                                                                                                                                                                                                                                                                                                                                                            |                                                                                                                                                              |                   |
| 35 |                                    |      |                                                                                                                                                                               |                                                                                                                                                            |                                                                                                                                                                                                                                                                                                                                                                            |                                                                                                                                                              |                   |
| 36 |                                    |      |                                                                                                                                                                               |                                                                                                                                                            |                                                                                                                                                                                                                                                                                                                                                                            |                                                                                                                                                              |                   |
| 37 |                                    |      |                                                                                                                                                                               |                                                                                                                                                            |                                                                                                                                                                                                                                                                                                                                                                            |                                                                                                                                                              |                   |
| 38 |                                    |      |                                                                                                                                                                               |                                                                                                                                                            |                                                                                                                                                                                                                                                                                                                                                                            |                                                                                                                                                              |                   |
| 39 |                                    |      |                                                                                                                                                                               |                                                                                                                                                            |                                                                                                                                                                                                                                                                                                                                                                            |                                                                                                                                                              |                   |
| 40 | <b>Verhagen et al<sup>26</sup></b> | 2013 | Culturally sensitive care for elderly immigrants through ethnic community health workers: design and development of a community based intervention program in the Netherlands | Use of ethnically similar CHWs to deliver health and social care; active case finding; community-driven problem solving with oversight by CHWs             | Lack of participation by target community in culturally-sensitive design; limited knowledge by target community around availability of services                                                                                                                                                                                                                            | Use of ethnically-similar CHWs                                                                                                                               | Netherlands       |
| 41 |                                    |      |                                                                                                                                                                               |                                                                                                                                                            |                                                                                                                                                                                                                                                                                                                                                                            |                                                                                                                                                              |                   |
| 42 |                                    |      |                                                                                                                                                                               |                                                                                                                                                            |                                                                                                                                                                                                                                                                                                                                                                            |                                                                                                                                                              |                   |
| 43 |                                    |      |                                                                                                                                                                               |                                                                                                                                                            |                                                                                                                                                                                                                                                                                                                                                                            |                                                                                                                                                              |                   |
| 44 |                                    |      |                                                                                                                                                                               |                                                                                                                                                            |                                                                                                                                                                                                                                                                                                                                                                            |                                                                                                                                                              |                   |
| 45 |                                    |      |                                                                                                                                                                               |                                                                                                                                                            |                                                                                                                                                                                                                                                                                                                                                                            |                                                                                                                                                              |                   |
| 46 |                                    |      |                                                                                                                                                                               |                                                                                                                                                            |                                                                                                                                                                                                                                                                                                                                                                            |                                                                                                                                                              |                   |
| 47 |                                    |      |                                                                                                                                                                               |                                                                                                                                                            |                                                                                                                                                                                                                                                                                                                                                                            |                                                                                                                                                              |                   |
| 48 |                                    |      |                                                                                                                                                                               |                                                                                                                                                            |                                                                                                                                                                                                                                                                                                                                                                            |                                                                                                                                                              |                   |
| 49 |                                    |      |                                                                                                                                                                               |                                                                                                                                                            |                                                                                                                                                                                                                                                                                                                                                                            |                                                                                                                                                              |                   |
| 50 | <b>Woodland et al<sup>27</sup></b> | 2016 | Evaluation of a school screening program for young people from refugee backgrounds                                                                                            | Active case finding and problem solving through education system (school nurses); translation support                                                      | Poor integration of multiple service providers; lack of funding                                                                                                                                                                                                                                                                                                            | Integration within the school; informal communication between clinicians and the school                                                                      | Australia         |
| 51 |                                    |      |                                                                                                                                                                               |                                                                                                                                                            |                                                                                                                                                                                                                                                                                                                                                                            |                                                                                                                                                              |                   |
| 52 |                                    |      |                                                                                                                                                                               |                                                                                                                                                            |                                                                                                                                                                                                                                                                                                                                                                            |                                                                                                                                                              |                   |
| 53 |                                    |      |                                                                                                                                                                               |                                                                                                                                                            |                                                                                                                                                                                                                                                                                                                                                                            |                                                                                                                                                              |                   |
| 54 |                                    |      |                                                                                                                                                                               |                                                                                                                                                            |                                                                                                                                                                                                                                                                                                                                                                            |                                                                                                                                                              |                   |
| 55 |                                    |      |                                                                                                                                                                               |                                                                                                                                                            |                                                                                                                                                                                                                                                                                                                                                                            |                                                                                                                                                              |                   |
| 56 |                                    |      |                                                                                                                                                                               |                                                                                                                                                            |                                                                                                                                                                                                                                                                                                                                                                            |                                                                                                                                                              |                   |
| 57 |                                    |      |                                                                                                                                                                               |                                                                                                                                                            |                                                                                                                                                                                                                                                                                                                                                                            |                                                                                                                                                              |                   |
| 58 |                                    |      |                                                                                                                                                                               |                                                                                                                                                            |                                                                                                                                                                                                                                                                                                                                                                            |                                                                                                                                                              |                   |
| 59 |                                    |      |                                                                                                                                                                               |                                                                                                                                                            |                                                                                                                                                                                                                                                                                                                                                                            |                                                                                                                                                              |                   |
| 60 |                                    |      |                                                                                                                                                                               |                                                                                                                                                            |                                                                                                                                                                                                                                                                                                                                                                            |                                                                                                                                                              |                   |



|    |                                    |      |                                                                                                                  |                                                                                                                                                                                                                                                                                                                                     |                                                                                                                                                                                                        |                                                                                                                                                                                                                                                                                                                                                                                                                                                                                   |           |
|----|------------------------------------|------|------------------------------------------------------------------------------------------------------------------|-------------------------------------------------------------------------------------------------------------------------------------------------------------------------------------------------------------------------------------------------------------------------------------------------------------------------------------|--------------------------------------------------------------------------------------------------------------------------------------------------------------------------------------------------------|-----------------------------------------------------------------------------------------------------------------------------------------------------------------------------------------------------------------------------------------------------------------------------------------------------------------------------------------------------------------------------------------------------------------------------------------------------------------------------------|-----------|
| 1  |                                    |      |                                                                                                                  |                                                                                                                                                                                                                                                                                                                                     |                                                                                                                                                                                                        |                                                                                                                                                                                                                                                                                                                                                                                                                                                                                   |           |
| 2  |                                    |      |                                                                                                                  |                                                                                                                                                                                                                                                                                                                                     |                                                                                                                                                                                                        |                                                                                                                                                                                                                                                                                                                                                                                                                                                                                   |           |
| 3  | <b>Woodland et al<sup>39</sup></b> | 2010 | Health service delivery for newly arrived refugee children: A framework for good practice                        | Comprehensive, screening services; partnerships between community and health services (refugee health nurse as system navigator); transportation services to access centres; specific training provided to physicians and other care providers, including referral pathways; Pharmaceutical benefit scheme addressing refugee needs | Lack of coordinated policy for all categories of refugees and asylum seekers; administrative burden of PHC coordination; lack of information for managing conditions specific or prominent to refugees | Family-based services (colocation to address family needs); refugee health nurses (system navigators) decrease administrative burden of coordination; consumer participation and consultation; colocation of screening services ; transportation support for getting to services; strong health information systems; data and consultations used to inform the direction of intersectoral collaboration and nature of partnerships between health and community service providers | Australia |
| 23 | <b>Yeung et al<sup>37</sup></b>    | 2004 | Integrating psychiatry and primary care improves acceptability to mental health services among Chinese Americans | Specific training provided to physicians and other care providers; mental health support (colocation of mental health services); primary care nurse as a bridge/ system navigator for referrals;                                                                                                                                    | Funding for coordination outside purview of essential services; lack of knowledge on culturally-appropriate mental health services                                                                     | Co-location of primary care and mental health services; designated staff as the bridge; training of service providers                                                                                                                                                                                                                                                                                                                                                             | USA       |

212

213 To respond to research question 1, each of the interventions and summarized barriers and  
 214 facilitators are described in Table 1 and grouped by common themes in Table 2. Findings are  
 215 summarized in this section. Common facilitators identified in programs and approaches to  
 216 protect refugee health through intersectoral approaches and integration of services include:  
 217 strong communication of program availability, tools and training for providers, colocation of  
 218 services, transportation services to enhance access, clear role definitions, interprofessional team  
 219 and relationship management across providers, appropriate allocation of budget and financing,  
 220 and coordinated refugee-specific policies.

221 Barriers articulated include: lack of a participatory approach, poor communication  
 222 leading to stigma and underuse of services, insufficient resources given to providers, absence of

223 financing, unclear roles and insufficient coordination of interprofessional teams, exclusionary  
 224 refugee policies, low availability and use of data, and turf wars across governance stakeholders.  
 225 Table 2 highlights the studies that expand on these themes as barriers or facilitators.

226 **Table 2. Barriers & Facilitators Commonly Discussed Across Studies**

| Elements                                                            | Element present as barrier                                                                                                                     | Element present as facilitator                                                                                           |
|---------------------------------------------------------------------|------------------------------------------------------------------------------------------------------------------------------------------------|--------------------------------------------------------------------------------------------------------------------------|
| Community engagement                                                | Calvo et al; <sup>30</sup> Verhagen et al <sup>26</sup>                                                                                        | Kim et al; <sup>36</sup> Mortensen; <sup>31</sup> McMurray et al; <sup>35</sup> Cowell et al <sup>25</sup>               |
| Communication between host and refugee communities                  |                                                                                                                                                | Calvo et al; <sup>30</sup> Woodland et al, 2016 <sup>27</sup>                                                            |
| Tools/Training for service providers to support integrated services | Catarci; <sup>34</sup> MacFarlane et al; <sup>33</sup> Woodland et al, 2010 <sup>39</sup>                                                      | Woodland et al, 2010; <sup>39</sup> Yeung et al; <sup>37</sup> Geltman et al <sup>38</sup>                               |
| Colocation of services                                              |                                                                                                                                                | Woodland et al, 2010; <sup>39</sup> Yeung et al; <sup>37</sup> Lilleston et al; <sup>28</sup> Guruge et al <sup>29</sup> |
| Transportation                                                      |                                                                                                                                                | Woodland et al, 2010 <sup>39</sup>                                                                                       |
| Networks between providers                                          |                                                                                                                                                | Catarci; <sup>34</sup> Stewart et al; <sup>32</sup> Geltman et al <sup>38</sup>                                          |
| Budget/Appropriate funding streams                                  | Kim et al; <sup>36</sup> McMurray et al; <sup>35</sup> Stewart et al <sup>32</sup>                                                             | Philbin; <sup>40</sup> Tuepker et al; <sup>41</sup> Geltman et al <sup>38</sup>                                          |
| Role definitions                                                    | Kim et al <sup>36</sup>                                                                                                                        | McNaughton et al; <sup>24</sup> Lilleston et al; <sup>28</sup> Yeung et al <sup>37</sup>                                 |
| Interprofessional team management                                   | Stewart et al; <sup>32</sup> Woodland et al, 2016 <sup>27</sup>                                                                                | Kim et al <sup>36</sup>                                                                                                  |
| Refugee-specific policies                                           | Mortensen; <sup>31</sup> Philbin; <sup>40</sup> Tuepker et al; <sup>41</sup> Woodland et al, 2010; <sup>39</sup> Lilleston et al <sup>28</sup> | MacFarlane et al; <sup>33</sup> Philbin <sup>40</sup>                                                                    |
| Data                                                                | Mortensen; <sup>31</sup> Tuepker et al <sup>41</sup>                                                                                           |                                                                                                                          |
| Organizational turf                                                 | Stewart et al; <sup>32</sup> Tuepker et al <sup>41</sup>                                                                                       |                                                                                                                          |

227  
 228 To respond to research question 2, this section will summarize common themes identified  
 229 as enabling strategies that support intersectoral collaboration to promote refugee health.  
 230 Strategies identified in this review include: establishing networks of service delivery through a  
 231 combination of existing public and private services, establishing a system navigator role,  
 232 engaging host communities to reduce stigma, ensuring availability of translation services,  
 233 outreach, and advocacy and legislative support. Table 3 highlights the studies that address each  
 234 of these strategies. In Italy for example, networks were promoted among private and public

1  
2  
3 235 authorities and service providers, including health, employment, vocational training and  
4  
5 236 continuing education services.<sup>34</sup> In this model, users moved through the pathways of integration  
6  
7 237 and can receive support for any combination of health needs, access to education, housing  
8  
9 238 support, and legal assistance.<sup>34</sup> Collaborative design and delivery of services was also  
10  
11 239 demonstrated in Australia with support from multidisciplinary, intersectoral teams, but a lack of  
12  
13 240 funding presented barriers to the potential success of this initiative.<sup>27</sup> Similarly in the USA, the  
14  
15 241 “Bridge Project” faced insufficient funding in the coordination of care despite seeing promising  
16  
17 242 results from use of a system navigator – or primary care nurse “bridge” – to connect primary care  
18  
19 243 and mental health care services.<sup>37</sup> A network of “gateway services” was also tested in Canada  
20  
21 244 using a “Reception House” model.<sup>35</sup> These services are characterized by being person-centred,  
22  
23 245 interprofessional, communication-focused, and comprehensive across the continuum of care.<sup>35</sup>  
24  
25 246 Relationship-management between the Reception House, health professionals, translation  
26  
27 247 services, and social services was acknowledge as a key component for success.<sup>35</sup> Input from  
28  
29 248 international medical graduates in training also supported this work by enhancing culturally  
30  
31 249 appropriate service delivery by this network of partners.<sup>35</sup>  
32  
33  
34  
35  
36  
37

38 250 Striking a balance between providing tailored, culturally-appropriate care and integrating  
39  
40 251 health and social services for refugees into existing services in the host community can be  
41  
42 252 especially challenging. Policy reviews suggest that taking a “one-policy, one-level, one-  
43  
44 253 outcome” approach or focusing refugee management under one ministry is not sufficient in  
45  
46 254 addressing the wide range of obstacles that both host and refugee communities are facing as a  
47  
48 255 result of the current political climate.<sup>40,41</sup> The Ethiopian government for example had success in  
49  
50 256 reorganizing ministries to incorporate refugee management into existing portfolios rather than a  
51  
52  
53  
54  
55  
56  
57  
58  
59  
60

257 refugee-specific one, moving refugee assistance programs out of camps and promoting more  
 258 collaboration across government and non-governmental programs.<sup>41</sup>

259 **Table 3. Enabling Strategies Present Across Studies**

| Strategy                                                                   | Studies                        |                                |                                    |                                    |                                    |                               |                            |
|----------------------------------------------------------------------------|--------------------------------|--------------------------------|------------------------------------|------------------------------------|------------------------------------|-------------------------------|----------------------------|
| Host community engagement                                                  | Calvo et al <sup>30</sup>      |                                |                                    |                                    |                                    |                               |                            |
| System navigation                                                          | Calvo et al <sup>30</sup>      | Kim et al <sup>36</sup>        | McMurray et al <sup>35</sup>       | Woodland et al, 2010 <sup>39</sup> | Yeung et al <sup>37</sup>          | Lilleston et al <sup>28</sup> |                            |
| Integrated health and social services through networked approach           | Catarci <sup>34</sup>          | Kim et al <sup>36</sup>        | McMurray et al <sup>35</sup>       | Yeung et al <sup>37</sup>          |                                    |                               |                            |
| Translation support                                                        | Kim et al <sup>36</sup>        | MacFarlane et al <sup>33</sup> | McMurray et al <sup>35</sup>       | McNaughton et al <sup>24</sup>     | Woodland et al, 2016 <sup>27</sup> | Cowell et al <sup>25</sup>    | Guruge et al <sup>29</sup> |
| Active case finding/Outreach                                               | McNaughton et al <sup>24</sup> | Verhagen et al <sup>26</sup>   | Woodland et al, 2016 <sup>27</sup> | Guruge et al <sup>29</sup>         |                                    |                               |                            |
| Refugee-specific service delivery and access to health and social networks | Mortensen <sup>31</sup>        | Philbin et al <sup>40</sup>    | Stewart et al <sup>32</sup>        | Verhagen et al <sup>26</sup>       |                                    |                               |                            |
| Legislative support                                                        | Philbin et al <sup>40</sup>    | Tuepker et al <sup>41</sup>    | Woodland et al, 2010 <sup>39</sup> | Geltman et al <sup>38</sup>        |                                    |                               |                            |
| Changes in funding modalities                                              | Tuepker et al <sup>41</sup>    |                                |                                    |                                    |                                    |                               |                            |

260  
 261 In terms of stakeholders involved (research question 3) in implementing, monitoring or  
 262 facilitating the aforementioned strategies, studies did not always report on the parties involved in  
 263 governance, financing, planning, service delivery, monitoring and evaluation or demand  
 264 generation (elements drawn from the integration framework by Atun et al (2010)<sup>21</sup>). Where they  
 265 were mentioned, stakeholders responsible for the governance of interventions addressing refugee  
 266 health were comprised of primary care centres,<sup>35,37</sup> municipal governments,<sup>30,38</sup> departments of  
 267 social services and/or public health,<sup>30,36</sup> central services responsible for coordination of refugee  
 268 services and provision of assistance to local services,<sup>34,35</sup> national governments,<sup>31,32</sup> and  
 269 international bodies.<sup>28</sup> Stakeholders responsible for health financing consisted of individual

1  
2  
3 270 fundraising by service providers,<sup>31,33</sup> government,<sup>30,31,35,38,41</sup> and international bodies or  
4  
5 271 donors.<sup>28,36,37,41</sup> Program and policy planning stakeholders encompassed national  
6  
7 272 governments,<sup>31,38,41</sup> departments of social services and/or public health,<sup>27,30,36</sup> central services  
8  
9  
10 273 responsible for coordination of refugee services and provision of assistance to local  
11  
12 274 services,<sup>29,34,35</sup> researchers,<sup>24,26,30,36,37</sup> service providers,<sup>27,28,35,37</sup> and international bodies or  
13  
14 275 donors.<sup>28,36,41</sup> Service delivery stakeholders included national departments of social services  
15  
16 276 and/or public health,<sup>27,30,33,36,38-41</sup> networks of local service providers in health, education,  
17  
18 277 socialization, translation and/or employment,<sup>24,31,34,36</sup> healthcare providers,<sup>27,33,35,37,38</sup> central  
19  
20 278 services responsible for coordination of refugee services and provision of assistance to local  
21  
22 279 services,<sup>32,34,35</sup> community health workers,<sup>26</sup> and international bodies.<sup>28,41</sup> Stakeholders  
23  
24  
25 280 responsible for monitoring and evaluation were seldom explicitly mentioned. For demand  
26  
27 281 generation, stakeholders included central services responsible for the coordination of refugee  
28  
29 282 services and provision of assistance to local services,<sup>35</sup> local media in the language of the target  
30  
31 283 population,<sup>36</sup> community leaders and/or community health workers,<sup>26,28,31,32</sup> home health  
32  
33 284 outreach services,<sup>28,31</sup> and healthcare providers.<sup>33,37</sup>

## 285 **DISCUSSION**

36  
37  
38  
39 286 The findings from the existing but scarce literature highlight critical factors necessary in  
40  
41 287 facilitating intersectoral collaboration and the successful integration of refugee services within  
42  
43 288 existing health systems. The three research questions studied demonstrated barriers and  
44  
45 289 facilitators, enabling strategies recorded in the literature, and the stakeholders involved. This  
46  
47 290 section will summarize key themes across these topics and discuss implications for program  
48  
49 291 implementation, policy and future research.

50  
51  
52  
53  
54 292

### 293 **Coordination of Existing Public and Private Services**

294 A networked approach to service delivery during the initial reception of refugees can often  
295 mitigate some of the difficulties encountered by refugee communities. Some examples of  
296 coordination of services were seen in Italy,<sup>34</sup> Australia,<sup>27</sup> the US,<sup>37</sup> and Canada.<sup>35</sup> In Canada,  
297 where a network of “gateway services” was tested using the “Reception House” model, it  
298 successfully provided responsive and culturally sensitive primary care.<sup>35</sup> By partnering  
299 community and translation services, as well as health care providers with the Reception House, it  
300 decreased wait times and improved health care access through referrals and coordination of  
301 services.<sup>35</sup> Further analysis with costing studies on a tailored package of health services for  
302 vulnerable populations could help to support improved financing of efforts at coordination of  
303 services across sectors.

### 304 **Introduction of a System Navigator Role**

305 Integration works through establishing relationships across networks of local stakeholders and  
306 service providers. To coordinate this effectively, a system navigator role can be established – the  
307 evidence suggests that this role is most effective in the early stage of resettlement.<sup>35</sup> The system  
308 navigation role can be played by an organization or by people within the existing health or social  
309 systems. It connects incoming refugees to timely, culturally-appropriate care in the community  
310 without creating parallel structures that either threaten host communities or further stigmatize  
311 refugees.<sup>30,35</sup> The likelihood of success of a system navigator role is further strengthened when  
312 providers have access to the knowledge, tools and training needed to address the specific needs  
313 of refugees, including the more vulnerable subgroups (e.g., the elderly, women, and children).  
314 Providers need to understand the context in which they work and the available features and  
315 services, user needs, and legislation as it relates to refugees.<sup>34</sup> Those playing a coordination or

1  
2  
3 316 system navigation role should also be able to build strong networks with allied specialists,  
4  
5 317 identify appropriate resources and reach out to users.<sup>34,35</sup> The risk here however is that  
6  
7 318 integrating refugee care may eliminate some determination procedures, potentially undermining  
8  
9 319 the protection mandate and underestimate the tailored needs of refugees dealing with significant  
10  
11 320 trauma.<sup>41</sup> Future research on the required competencies of the system navigator role is required  
12  
13 321 to ensure that appropriate professionals are recruited and trained.  
14  
15

### 16 17 322 **Advocacy and Legislative Support**

18  
19 323 Exclusionary immigration policies can play a considerable role in marginalization and  
20  
21 324 discrimination against refugee communities leading to decreased health seeking behaviors and  
22  
23 325 use of available integrated or intersectoral services.<sup>40</sup> Effective advocacy needs to target the  
24  
25 326 policy-making levels in order to counteract the negative impacts of exclusionary policies.  
26  
27 327 Advocacy by health care providers can be influential at the institutional level to push for better  
28  
29 328 allocation of services and funding.<sup>31</sup> A multipronged approach may be necessary to continue to  
30  
31 329 advocate for the right to health for refugees by addressing legal challenges, establishing timely  
32  
33 330 and accurate data and information systems to capture needs, creating health promoting  
34  
35 331 environments, investing in person-centred, culturally-appropriate and easily accessible services,  
36  
37 332 and evaluating coordination and service delivery efforts. Engaging policy makers in knowledge  
38  
39 333 translation and evidence-informed decision-making is one way to effectively advocate and  
40  
41 334 provide legislative support in refugee health. In Lebanon for example, where there are huge  
42  
43 335 demands in meeting the health needs of a large Syrian refugee population, researchers engaged  
44  
45 336 policy-makers in knowledge production (i.e. research priority-setting), translation and uptake  
46  
47 337 activities.<sup>42</sup> This ultimately led to the hiring of a refugee health coordinator by the Lebanese  
48  
49 338 Ministry of Public Health. The refugee health coordinator role functioned to support intersectoral  
50  
51  
52  
53  
54  
55  
56  
57  
58  
59  
60

1  
2  
3 339 collaboration, assisting in strategic planning and implementation of action plans to respond to the  
4  
5 340 health needs of Syrian refugees including helping with the development of refugee health  
6  
7 341 information systems at the Ministry of Public Health.<sup>42</sup> The UCL-Lancet Commission on  
8  
9  
10 342 Migration and Health also supports knowledge translation by bringing together academics,  
11  
12 343 policymakers, and health system experts to take an inter-disciplinary approach to reviewing  
13  
14 344 evidence, develop policy recommendations and disseminate these findings globally amongst  
15  
16 345 policymakers and institutions.<sup>43</sup>  
17  
18

### 19 346 **Alternative Models of Care to Reach Vulnerable Women and Children**

20  
21 347 Among the studies that reported targeted interventions for women and children, alternative  
22  
23 348 models of care were used. This included mobile health clinics, and programs linked to schools to  
24  
25 349 support screening and active case finding. These alternate models increased accessibility of  
26  
27 350 essential health services, increase detection of health conditions, and improve coordination of  
28  
29 351 care, and reduced feelings of social isolation.<sup>27,28</sup> This suggests that flexible service delivery and  
30  
31 352 innovation in mode of delivery should be considered when attempting to reach at risk refugee  
32  
33 353 groups. Better collection and use of evidence on the needs of vulnerable refugee subgroups and  
34  
35 354 how to target them are essential next steps to design appropriate service delivery models.  
36  
37  
38  
39

### 40 355 **Policy Insights**

41  
42 356 From the available evidence, the following are policy insights to inform greater integration of  
43  
44 357 services and/or intersectoral collaboration. These recommendations are based on consistent  
45  
46 358 facilitators and barriers identified across studies included in this review. They are critical starting  
47  
48 359 points in enhancing programs to better serve refugees while promoting efficiency in health  
49  
50 360 systems.  
51  
52  
53  
54  
55  
56  
57  
58  
59  
60



- 1  
2  
3 361 1) Strengthening the coordination between existing programs through financing stronger  
4  
5 362 referral systems and colocation of services  
6  
7
- 8 363 2) Incentivizing health and social service authorities to establish and finance formal system  
9  
10 364 navigator roles that connect all relevant services – provision of information technology  
11  
12 365 tools can help support this function and better manage the network of available programs  
13  
14
- 15 366 3) Engaging host communities to enhance understanding, reduce stigma, and to create an  
16  
17 367 enabling environment for policies that protect refugees and their rights to social  
18  
19 368 determinants of health  
20
- 21 369 4) Communicating the availability of programs and services through cultural mediators and  
22  
23  
24 370 establishing formal translation and transport services to improve access  
25
- 26 371 5) Establishing training and resources for providers to a) better understand the needs of  
27  
28 372 refugee communities, b) be aware of available and relevant services for referral across  
29  
30  
31 373 sectors, and c) more efficiently manage cases  
32

### 33 374 **Limitations and Future Directions**

34  
35 375 Our review was limited by the scarcity of evidence in this area. Due to this, all relevant studies  
36  
37 376 were included, therefore, quality and rigor may vary. Some key programs and approaches may  
38  
39  
40 377 be missing due to interventions occurring at the individual level instead of at the systems level,  
41  
42 378 as well as not having been published in academic literature. Individual health providers or  
43  
44  
45 379 organizations will navigate barriers in health systems through tacit and experiential knowledge  
46  
47 380 that is often not documented. Data will be further amplified by conducting key informant  
48  
49 381 interviews in selected countries.  
50

51 382 As others have noted, the literature on intersectoral collaboration disproportionately  
52  
53  
54 383 focuses on high-income countries.<sup>44</sup> It is therefore no surprise that the evidence for this review  
55  
56  
57  
58  
59  
60

1  
2  
3 384 largely came from high-income countries with only two studies conducted in upper-middle  
4  
5 385 income and two in low-income countries. This may affect the generalizability of the findings  
6  
7 386 reported here as low-income and middle-income countries have greater coordination challenges  
8  
9 387 to overcome due to fragmented systems and weak governance.<sup>45</sup> Additionally, according to the  
10  
11 388 latest report on the UN Refugee Agency, approximately 85% of refugees are hosted in  
12  
13 389 developing nations.<sup>46</sup> More evidence and special consideration is needed in these contexts with  
14  
15 390 respect to refugee health, particularly for those most at risk subgroups such as women, children  
16  
17 391 and the elderly.

18  
19  
20  
21 392 Although there exists reaffirmed enthusiasm in intersectoral approaches to achieving  
22  
23 393 global health agendas such as the SDGs, it has been found that the lack of quality evidence  
24  
25 394 represents an essential hurdle to evidence-informed decision-making for the development of  
26  
27 395 cross-cutting policies and governance required for sustained intersectoral collaboration.<sup>44</sup> This  
28  
29 396 pattern of a dearth of evidence was seen in our review. Additionally, most of what has been  
30  
31 397 written has not been grounded in relevant theories or frameworks.<sup>45</sup> Our use of frameworks to  
32  
33 398 structure our analysis is a step forward in addressing this issue. Generating high quality data in  
34  
35 399 health systems and policy research for migrant health and on intersectoral approaches has been  
36  
37 400 identified as a research priority.<sup>44,47</sup> Future research should therefore also consider the structured  
38  
39 401 evaluation of evidence through a frameworked approach.

## 402 **CONCLUSION**

403 Refugees experience individual, institutional, and system level obstacles when seeking health  
404 care. To ensure adequate health services tailored to this vulnerable population, conducting  
405 research and gathering quality evidence on integrated and intersectoral approaches is a top

1  
2  
3 406 priority. This scoping review has highlighted important gaps in current knowledge and made  
4  
5 407 suggestions for future research relevant to key themes.  
6

7  
8 408 Our findings indicate that policies aiming at integrating services and fostering  
9  
10 409 intersectoral action should consider system-level approaches such as the colocation of services,  
11  
12 410 transportation support, and establishing system navigator roles. Communication challenges due  
13  
14 411 to language barriers should also be addressed with a view of providing culturally-sensitive  
15  
16 412 programs. There is also a need to strengthen the capacities of frontline providers and managers,  
17  
18 413 to improve their knowledge of available services as well as their ability to provide care to  
19  
20 414 specialized vulnerable groups such as refugees. Engaging host communities around a human  
21  
22 415 rights-focused strategy to the health of refugees is also fundamental to address discrimination  
23  
24 416 and stigma. Current gaps in knowledge found in our study represent an untapped potential for  
25  
26 417 improvements to financial and human resource efficiency in health systems. Given the limited  
27  
28 418 evidence we found in our scoping review, the momentum for continued research should be  
29  
30 419 sustained.  
31  
32  
33  
34  
35  
36  
37

### 38 421 **ETHICS APPROVAL**

39  
40 422 Ethics approval was not required for this scoping review as human subjects are not involved.  
41  
42

### 43 423 **AUTHOR'S CONTRIBUTIONS**

44  
45 424 GT together with librarians at Karolinska Institutet identified databases and planned the literature  
46  
47 425 search. SH & DJ drafted the paper and incorporated co-author feedback, SH & DJ abstracted data  
48  
49 426 from peer-reviewed literature. SC, EVL, GT and PF provided critical feedback and comments on  
50  
51 427 the manuscript. SC and SH acted as secondary reviewers.  
52  
53  
54

55 428  
56  
57  
58  
59  
60

## 429 ACKNOWLEDGMENTS

430 The authors would like to thank Karolinska Institutet librarians, Magdalena Svanberg and Gun  
431 Brit Knutssön, for their contributions, specifically in running the search and identifying  
432 appropriate databases. We are also grateful to WHO Euro for their discussions and suggestions  
433 in the early stages of this project.

## 434 DATA AVAILABILITY STATEMENT

435 No data are available.

## 436 COMPETING INTERESTS

437 None.

## 438 FUNDING STATEMENT

439 No funding was obtained for this project. In-kind time contributions from staff at the Alliance for  
440 Health Policy and Systems Research and SIGHT have made this possible.

## 441 REFERENCES

- 442 1 OHCHR. The Right to Health. Geneva, Switzerland, 2008.
- 443 2 Tangcharoensathien V, Mills A, Palu T. Accelerating health equity: the key role of  
444 universal health coverage in the Sustainable Development Goals. *BMC Med* 2015; **13**:  
445 101.
- 446 3 UNHCR. Convention and Protocol relating to the status of refugees. Geneva, Switzerland,  
447 2010.
- 448 4 UNHCR. UNHCR viewpoint: ‘Refugee’ or ‘migrant’ – Which is right? Geneva,  
449 Switzerland, 2016.
- 450 5 Rechel B, Mladovsky P, Ingleby D, Mackenbach JP, McKee M. Migration and health in  
451 an increasingly diverse Europe. *Lancet* 2013; **381**: 1235–45.
- 452 6 Council for the EU. Council Directive 2003/9/EC of 27 January 2003 Laying Down  
453 Minimum Standards for the Reception of Asylum Seekers in Member States. *Off J Eur*  
454 *Union* 2003 2003; : L 31/18.
- 455 7 OHCHR. General Recommendation 30. Discrimination against non-citizens. Geneva,  
456 Switzerland, 2004.
- 457 8 Jackson-Bowers, Eleanor, Cheng I-H. Meeting the primary health care needs of refugees  
458 and asylum seekers. *Res Roundup* 2010.
- 459 9 WHO. Advancing the right to health: the vital role of law. Geneva, Switzerland, 2017.
- 460 10 Joshi C, Russell G, Cheng I-H, *et al*. A narrative synthesis of the impact of primary health  
461 care delivery models for refugees in resettlement countries on access, quality and  
462 coordination. *Int J Equity Health* 2013; **12**: 88.

- 1  
2  
3 463 11 Citizenship AGD of I and. Fact sheet 60 - Australia's refugee and humanitarian program.  
4 464 2012.  
5 465 12 UN. Integrated Approaches to Sustainable Development Planning and Implementation.  
6 466 New York, USA, 2015.  
7  
8 467 13 Kett ME. Internally Displaced Peoples in Bosnia-Herzegovina: Impacts of Long-term  
9 468 Displacement on Health and Well-being. *Med Confl Surviv* 2005; **21**: 199–215.  
10 469 14 Patel N, Kellezi B, Williams AC de C. Psychological, social and welfare interventions for  
11 470 psychological health and well-being of torture survivors. *Cochrane Database Syst Rev*  
12 471 2014; published online Nov 11. DOI:10.1002/14651858.CD009317.pub2.  
13  
14 472 15 Arksey H, O'Malley L. Scoping studies: towards a methodological framework. *Int J Soc*  
15 473 *Res Methodol* 2005; **8**: 19–32.  
16 474 16 Tricco AC, Lillie E, Zarin W, *et al*. A scoping review on the conduct and reporting of  
17 475 scoping reviews. *BMC Med Res Methodol* 2016; **16**: 15.  
18 476 17 Peters MDJ, Godfrey CM, Khalil H, McInerney P, Parker D, Baldini Soares C. The  
19 477 Joanna Briggs Institute Reviewers' Manual: Methodology for JBI Scoping Review.  
20 478 Adelaide, Australia, 2015.  
21  
22 479 18 Center for Open Science. Open Science Framework. <https://osf.io/>.  
23 480 19 Javadi D, Langlois E V., Ho S, Friberg P, Tomson G. Intersectoral approaches and  
24 481 integrated services in achieving the right to health for refugees upon resettlement: a  
25 482 scoping review protocol. *BMJ Open* 2017; **7**. DOI:10.1136/bmjopen-2017-016638.  
26 483 20 Walt G, Shiffman J, Schneider H, Murray SF, Brugha R, Gilson L. 'Doing' health policy  
27 484 analysis: methodological and conceptual reflections and challenges. *Health Policy Plan*  
28 485 2008; **23**: 308–17.  
29  
30 486 21 Atun R, de Jongh T, Secci F, Ohiri K, Adeyi O. Integration of targeted health  
31 487 interventions into health systems: a conceptual framework for analysis. *Health Policy*  
32 488 *Plan* 2010; **25**: 104–11.  
33 489 22 WHO. Health in All Policies: Framework for Country Action. Geneva, Switzerland, 2014.  
34 490 23 Thomas J, Harden A. Methods for the thematic synthesis of qualitative research in  
35 491 systematic reviews. *BMC Med Res Methodol* 2008; **8**: 45.  
36  
37 492 24 McNaughton DB, Hindin P, Guerrero Y. Directions for Refining a School Nursing  
38 493 Intervention for Mexican Immigrant Families. *J Sch Nurs* 2010; **26**: 430–5.  
39 494 25 Cowell JM, McNaughton D, Ailey S, Gross D, Fogg L. Clinical Trial Outcomes of the  
40 495 Mexican American Problem Solving Program (MAPS). *Hisp Heal Care Int* 2009; **7**: 178–  
41 496 89.  
42  
43 497 26 Verhagen I, Ros WJ, Steunenbergh B, de Wit NJ. Culturally sensitive care for elderly  
44 498 immigrants through ethnic community health workers: design and development of a  
45 499 community based intervention programme in the Netherlands. *BMC Public Health* 2013;  
46 500 **13**: 227.  
47 501 27 Woodland L, Kang M, Elliot C, Perry A, Eagar S, Zwi K. Evaluation of a school  
48 502 screening programme for young people from refugee backgrounds. *J Paediatr Child*  
49 503 *Health* 2016; **52**: 72–9.  
50 504 28 Lilleston P, Winograd L, Ahmed S, *et al*. Evaluation of a mobile approach to gender-  
51 505 based violence service delivery among Syrian refugees in Lebanon. *Health Policy Plan*  
52 506 2018; published online June 13. DOI:10.1093/heapol/czy050.  
53  
54 507 29 Guruge S, Hunter J, Barker K, McNally MJ, Magalhães L. Immigrant women's  
55 508 experiences of receiving care in a mobile health clinic. *J Adv Nurs* 2010; **66**: 350–9.  
56  
57  
58  
59  
60

- 1  
2  
3 509 30 Calvo R, Rojas V, Waters MC. The Effect of Universal Service Delivery on the  
4 510 Integration of Moroccan Immigrants in Spain: A Case Study from an Anti-Oppressive  
5 511 Perspective. *Br J Soc Work* 2014; **44**: i123–39.
- 6 512 31 Mortensen A. Public health system responsiveness to refugee groups in New Zealand:  
7 513 activation from the bottom up. *Soc Policy J New Zeal* 2011.
- 8 514 32 Stewart M, Anderson J, Beiser M, *et al*. Multicultural Meanings of Social Support among  
9 515 Immigrants and Refugees. *Int Migr* 2008; **46**: 123–59.
- 10 516 33 MacFarlane A, Singleton C, Green E. Language barriers in health and social care  
11 517 consultations in the community: A comparative study of responses in Ireland and England.  
12 518 *Health Policy (New York)* 2009; **92**: 203–10.
- 13 519 34 Catarci M. Conceptions and Strategies for User Integration across Refugee Services in  
14 520 Italy. *J Educ Cult Psychol Stud* 2012.
- 15 521 35 McMurray J, Breward K, Breward M, Alder R, Arya N. Integrated Primary Care Improves  
16 522 Access to Healthcare for Newly Arrived Refugees in Canada. *J Immigr Minor Heal* 2014;  
17 523 **16**: 576–85.
- 18 524 36 Kim MJ, Cho H-I, Cheon-Klessig YS, Gerace LM, Camilleri DD. Primary health care for  
19 525 Korean immigrants: sustaining a culturally sensitive model. *Public Health Nurs*; **19**: 191–  
20 526 200.
- 21 527 37 Yeung A, Kung WW, Chung H, *et al*. Integrating psychiatry and primary care improves  
22 528 acceptability to mental health services among Chinese Americans. *Gen Hosp Psychiatry*  
23 529 2004; **26**: 256–60.
- 24 530 38 Geltman PL, Cochran J. A Private-Sector Preferred Provider Network Model for Public  
25 531 Health Screening of Newly Resettled Refugees. *Am J Public Health* 2005; **95**: 196–9.
- 26 532 39 Woodland L, Burgner D, Paxton G, Zwi K. Health service delivery for newly arrived  
27 533 refugee children: A framework for good practice. *J Paediatr Child Health* 2010; **46**: 560–  
28 534 7.
- 29 535 40 Philbin MM, Flake M, Hatzenbuehler ML, Hirsch JS. State-level immigration and  
30 536 immigrant-focused policies as drivers of Latino health disparities in the United States. *Soc*  
31 537 *Sci Med* 2018; **199**: 29–38.
- 32 538 41 Tuepker A, Chi C. Evaluating integrated healthcare for refugees and hosts in an African  
33 539 context. *Heal Econ Policy Law* 2009; **4**: 159.
- 34 540 42 Langlois E V., Daniels K, Akl EA. Evidence synthesis for health policy and systems: a  
35 541 methods guide. Geneva, Switzerland, 2018.
- 36 542 43 The UCL-Lancet Commission on Migration and Health. UCL-Lancet Commission on  
37 543 Migration and Health. 2018.
- 38 544 44 Glandon D, Meghani A, Jessani N, Qiu M, Bennett S. Identifying health policy and  
39 545 systems research priorities on multisectoral collaboration for health in low-income and  
40 546 middle-income countries. *BMJ Glob Heal* 2018; **3**: e000970.
- 41 547 45 Bennett S, Glandon D, Rasanathan K. Governing multisectoral action for health in low-  
42 548 income and middle-income countries: unpacking the problem and rising to the challenge.  
43 549 *BMJ Glob Heal* 2018; **3**: e000880.
- 44 550 46 UNHCR. Global Trends Forced Displacement in 2017. Geneva, Switzerland, 2018  
45 551 <https://www.unhcr.org/5b27be547.pdf>.
- 46 552 47 Abubakar I, Aldridge RW, Devakumar D, *et al*. The UCL–Lancet Commission on  
47 553 Migration and Health: the health of a world on the move. *Lancet* 2018; **392**: 2606–54.  
48 554

1  
2  
3  
4  
5  
6  
7  
8  
9  
10  
11  
12  
13  
14  
15  
16  
17  
18  
19  
20  
21  
22  
23  
24  
25  
26  
27  
28  
29  
30  
31  
32  
33  
34  
35  
36  
37  
38  
39  
40  
41  
42  
43  
44  
45  
46  
47  
48  
49  
50  
51  
52  
53  
54  
55  
56  
57  
58  
59  
60

555

556 **Figure Legend**

- 557 **Figure 1: Scoping Review Flowchart**
- 558 **Table 1: Summary of Included Studies**
- 559 **Table 2: Barriers and Facilitators Commonly Discussed Across Studies**
- 560 **Table 3: Enabling Strategies Present Across Studies**

For peer review only





## 1 APPENDIX I

## 2 1. Medline (Ovid)

3 Date of Search: 2016-11-03

4 Number of hits: 2019

5 Comments:

6 Field labels:

7 .tw,kf. = title, abstract, keyword

8 exp/ = MeSH, exploded

9 / = MeSH, not exploded

10 adj3 = within two words

11 1. Refugees/

12 2. exp "Emigrants and Immigrants"/

13 3. "Emigration and Immigration"/

14 4. "Transients and Migrants"/

15 5. (refugee\* or immigra\* or migrat\* or migrant\* or asylum\* or transient\*).tw,kf.

16 6. or/1-5

17 7. Delivery of Health Care/

18 8. Health Services Accessibility/

19 9. Patient Acceptance of Health Care/

20 10. "Health Services Needs and Demand"/

21 11. Quality of Health Care/

22 12. Interinstitutional Relations/

23 13. Interdepartmental Relations/

24 14. Public-Private Sector Partnerships/

25 15. ((health care or healthcare or health service\*) adj3 (access\* or availab\* or barrier\* or deliver\* or need\* or provision\* or seeking or quality or utilization)).tw,kf.

26 16. ((multisector\* or multi-sector\* or intersector\* or inter-sector\* or crossector\* or cross-sector\* or interdisciplinary or inter-disciplinary or multidisciplinary or multi-disciplinary or interinstitution\* or inter-institution\* or interdepartment\* or inter-department\*) adj3 (analysis or collaborat\* or cooperat\* or co-operat\* or approach\* or partnership\* or relation\*)).tw,kf.

27 17. or/7-16

28 18. Healthcare Disparities/

29 19. Social Determinants of Health/

30 20. Health Status Disparities/

31 21. Health Equity/

32 22. exp Human Rights/

33 23. ((health or health care or healthcare or health service\*) adj3 (situation or difference\*)).tw,kf.

34 24. (disparit\* or equity or equities or inequity or inequities or equalit\* or inequalit\* or right\* or injustice\* or discrimination\* or determinant\* or disadvantage\* or vulnerab\*).tw,kf.

35 25. or/18-24

36 26. 6 and 17 and 25

37 27. Remove duplicates from 26

28. limit 27 to yr="2000 -Current"

## 2. Web of Science (Thomson Reuter)

Date of Search: 2016-11-03  
 Number of hits: 1.166  
 Comments:

Field labels:  
 TOPIC = title, abstract, keywords  
 NEAR/3 = within 3 words

#1 TOPIC: (refugee\* or immigra\* or migrat\* or migrant\* or asylum\* or transient\*)

#2 TOPIC: (("health care" or healthcare or "health service\*") NEAR/3 (access\* or availab\* or barrier\* or deliver\* or need\* or provision\* or seeking or quality or utilization))

#3 TOPIC: ((multisector\* or multi-sector\* or intersector\* or inter-sector\* or crosssector\* or cross-sector\* or interdisciplinary or inter-disciplinary or multidisciplinary or multi-disciplinary or interinstitution\* or inter-institution\* or interdepartment\* or inter-department\*) NEAR/3 (analysis or collaborat\* or cooperat\* or co-operat\* or approach\* or partnership\* or relation\*))

#4 #3 OR #2

#5 TOPIC: ((health or "health care" or healthcare or "health service\*") NEAR/3 (situation or difference\*))

#6 TOPIC: (disparit\* or equity or equities or inequity or inequities or equalit\* or inequalit\* or "human right\*" or "civil right\*" or "citizen\* right\*" or "social right\*" or injustice\* or discrimination\* or determinant\* or disadvantage\* or vulnerab\*)

#7 #6 OR #5

#8 #7 AND #4 AND #1

#9 Timespan: 2000-2016.

8

## 3. Global Health (Ovid)

Date of Search: 2016-11-03  
 Number of hits: 497  
 Comments:

Field labels:  
 .ab,ti. = title, abstract  
 exp/ =thesaurus term, exploded  
 / = thesaurus term, not exploded  
 adj3 = within two words

1. refugees/
2. immigrants/
3. migrants/
4. immigration/
5. (refugee\* or immigra\* or migrat\* or migrant\* or asylum\* or transient\*).ab,ti.
6. or/1-5
7. health care utilization/
8. ((health care or healthcare or health service\*) adj3 (access\* or availab\* or barrier\* or deliver\* or need\* or provision\* or seeking or quality or utilization)).ab,ti.
9. ((multisector\* or multi-sector\* or intersector\* or inter-sector\* or crosssector\* or cross-sector\* or interdisciplinary or inter-disciplinary or multidisciplinary or multi-disciplinary or interinstitution\* or inter-institution\* or interdepartment\* or inter-department\*) adj3 (analysis or collaborat\* or cooperat\* or co-operat\* or approach\* or partnership\* or relation\*)).ti,ab.
10. or/8-9
11. exp disparity/
12. exp discrimination/
13. human rights/
14. ((health or health care or healthcare or health service\*) adj3 (situation or difference\*)).ti,ab.
15. (disparit\* or equity or equities or inequity or inequities or equalit\* or inequalit\* or right\* or injustice\* or discrimination\* or determinant\* or disadvantage\* or vulnerab\*).ti,ab.
16. or/11-15
17. 6 and 10 and 16
18. limit 17 to yr="2000 -Current"

9

10

11

## 4. PsycInfo (OVID)

Date of Search: 2016-11-03  
 Number of hits: 667  
 Comments:

Field labels:  
 .ti,ab,id. = title, abstract, keyword  
 exp/ = subject heading, exploded  
 / = subject heading, not exploded  
 adj3 = within two words

1. exp Human Migration/
2. Immigration/
3. (refugee\* or immigra\* or migrat\* or migrant\* or asylum\* or transient\*).ti,ab,id.
4. or/1-3
  
5. Health Care Delivery/
6. Health Care Utilization/
7. Health Care Seeking Behavior/
8. Health Service Needs/
9. "Quality of Care"/
10. ((health care or healthcare or health service\*) adj3 (access\* or availab\* or barrier\* or deliver\* or need\* or provision\* or seeking or quality or utilization)).ti,ab,id.
11. ((multisector\* or multi-sector\* or intersector\* or inter-sector\* or crosssector\* or cross-sector\* or interdisciplinary or inter-disciplinary or multidisciplinary or multi-disciplinary or interinstitution\* or inter-institution\* or interdepartment\* or inter-department\*) adj3 (analysis or collaborat\* or cooperat\* or co-operat\* or approach\* or partnership\* or relation\*)).ti,ab,id.
12. or/5-11
  
13. Health Disparities/
14. Social Equality/
15. exp Human Rights/
16. ((health or health care or healthcare or health service\*) adj3 (situation or difference\*)).ti,ab,id.
  
17. (disparit\* or equity or equities or inequity or inequities or equalit\* or inequalit\* human right\* or civil right\* or citizen\* right\* or social right\* or injustice\* or discrimination\* or determinant\* or disadvantage\* or vulnerab\*).ti,ab,id.
18. or/13-17
  
19. 4 and 12 and 18
20. limit 19 to yr="2000 -Current"

12

13

14

15

16

## Preferred Reporting Items for Systematic reviews and Meta-Analyses extension for Scoping Reviews (PRISMA-ScR) Checklist

| SECTION                           | ITEM | PRISMA-ScR CHECKLIST ITEM                                                                                                                                                                                                                                                                                  | REPORTED ON PAGE #                                                                                        |
|-----------------------------------|------|------------------------------------------------------------------------------------------------------------------------------------------------------------------------------------------------------------------------------------------------------------------------------------------------------------|-----------------------------------------------------------------------------------------------------------|
| <b>TITLE</b>                      |      |                                                                                                                                                                                                                                                                                                            |                                                                                                           |
| Title                             | 1    | Identify the report as a scoping review.                                                                                                                                                                                                                                                                   | p. 1                                                                                                      |
| <b>ABSTRACT</b>                   |      |                                                                                                                                                                                                                                                                                                            |                                                                                                           |
| Structured summary                | 2    | Provide a structured summary that includes (as applicable): background, objectives, eligibility criteria, sources of evidence, charting methods, results, and conclusions that relate to the review questions and objectives.                                                                              | p. 2                                                                                                      |
| <b>INTRODUCTION</b>               |      |                                                                                                                                                                                                                                                                                                            |                                                                                                           |
| Rationale                         | 3    | Describe the rationale for the review in the context of what is already known. Explain why the review questions/objectives lend themselves to a scoping review approach.                                                                                                                                   | p. 5                                                                                                      |
| Objectives                        | 4    | Provide an explicit statement of the questions and objectives being addressed with reference to their key elements (e.g., population or participants, concepts, and context) or other relevant key elements used to conceptualize the review questions and/or objectives.                                  | p. 5                                                                                                      |
| <b>METHODS</b>                    |      |                                                                                                                                                                                                                                                                                                            |                                                                                                           |
| Protocol and registration         | 5    | Indicate whether a review protocol exists; state if and where it can be accessed (e.g., a Web address); and if available, provide registration information, including the registration number.                                                                                                             | p. 2<br>Registered on Open Science Framework<br><a href="https://osf.io/gt9ck/">https://osf.io/gt9ck/</a> |
| Eligibility criteria              | 6    | Specify characteristics of the sources of evidence used as eligibility criteria (e.g., years considered, language, and publication status), and provide a rationale.                                                                                                                                       | p. 6-7                                                                                                    |
| Information sources*              | 7    | Describe all information sources in the search (e.g., databases with dates of coverage and contact with authors to identify additional sources), as well as the date the most recent search was executed.                                                                                                  | Supplementary File                                                                                        |
| Search                            | 8    | Present the full electronic search strategy for at least 1 database, including any limits used, such that it could be repeated.                                                                                                                                                                            | Supplementary File                                                                                        |
| Selection of sources of evidence† | 9    | State the process for selecting sources of evidence (i.e., screening and eligibility) included in the scoping review.                                                                                                                                                                                      | p. 6-7                                                                                                    |
| Data charting process‡            | 10   | Describe the methods of charting data from the included sources of evidence (e.g., calibrated forms or forms that have been tested by the team before their use, and whether data charting was done independently or in duplicate) and any processes for obtaining and confirming data from investigators. | p. 8                                                                                                      |
| Data items                        | 11   | List and define all variables for which data were sought and any assumptions and simplifications made.                                                                                                                                                                                                     | p. 6-8                                                                                                    |
| Critical appraisal                | 12   | If done, provide a rationale for conducting a                                                                                                                                                                                                                                                              | p. 21                                                                                                     |

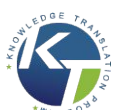

| SECTION                                       | ITEM | PRISMA-ScR CHECKLIST ITEM                                                                                                                                                                       | REPORTED ON PAGE #  |
|-----------------------------------------------|------|-------------------------------------------------------------------------------------------------------------------------------------------------------------------------------------------------|---------------------|
| of individual sources of evidence§            |      | critical appraisal of included sources of evidence; describe the methods used and how this information was used in any data synthesis (if appropriate).                                         |                     |
| Synthesis of results                          | 13   | Describe the methods of handling and summarizing the data that were charted.                                                                                                                    | p. 8                |
| <b>RESULTS</b>                                |      |                                                                                                                                                                                                 |                     |
| Selection of sources of evidence              | 14   | Give numbers of sources of evidence screened, assessed for eligibility, and included in the review, with reasons for exclusions at each stage, ideally using a flow diagram.                    | p. 9                |
| Characteristics of sources of evidence        | 15   | For each source of evidence, present characteristics for which data were charted and provide the citations.                                                                                     | p. 7-9              |
| Critical appraisal within sources of evidence | 16   | If done, present data on critical appraisal of included sources of evidence (see item 12).                                                                                                      | p. 21               |
| Results of individual sources of evidence     | 17   | For each included source of evidence, present the relevant data that were charted that relate to the review questions and objectives.                                                           | p. 9-17, tables 1-3 |
| Synthesis of results                          | 18   | Summarize and/or present the charting results as they relate to the review questions and objectives.                                                                                            | p. 9-17; tables 1-3 |
| <b>DISCUSSION</b>                             |      |                                                                                                                                                                                                 |                     |
| Summary of evidence                           | 19   | Summarize the main results (including an overview of concepts, themes, and types of evidence available), link to the review questions and objectives, and consider the relevance to key groups. | p. 17-21            |
| Limitations                                   | 20   | Discuss the limitations of the scoping review process.                                                                                                                                          | p. 21-22            |
| Conclusions                                   | 21   | Provide a general interpretation of the results with respect to the review questions and objectives, as well as potential implications and/or next steps.                                       | p. 22-23            |
| <b>FUNDING</b>                                |      |                                                                                                                                                                                                 |                     |
| Funding                                       | 22   | Describe sources of funding for the included sources of evidence, as well as sources of funding for the scoping review. Describe the role of the funders of the scoping review.                 | p. 24               |

JBI = Joanna Briggs Institute; PRISMA-ScR = Preferred Reporting Items for Systematic reviews and Meta-Analyses extension for Scoping Reviews.

\* Where *sources of evidence* (see second footnote) are compiled from, such as bibliographic databases, social media platforms, and Web sites.

† A more inclusive/heterogeneous term used to account for the different types of evidence or data sources (e.g., quantitative and/or qualitative research, expert opinion, and policy documents) that may be eligible in a scoping review as opposed to only studies. This is not to be confused with *information sources* (see first footnote).

‡ The frameworks by Arksey and O'Malley (6) and Levac and colleagues (7) and the JBI guidance (4, 5) refer to the process of data extraction in a scoping review as data charting.

§ The process of systematically examining research evidence to assess its validity, results, and relevance before using it to inform a decision. This term is used for items 12 and 19 instead of "risk of bias" (which is more applicable to systematic reviews of interventions) to include and acknowledge the various sources of evidence that may be used in a scoping review (e.g., quantitative and/or qualitative research, expert opinion, and policy document).



1  
2  
3 From: Tricco AC, Lillie E, Zarin W, O'Brien KK, Colquhoun H, Levac D, et al. PRISMA Extension for Scoping Reviews (PRISMA-  
4 ScR): Checklist and Explanation. Ann Intern Med. ;169:467–473. doi: 10.7326/M18-0850  
5  
6  
7  
8  
9  
10  
11  
12  
13  
14  
15  
16  
17  
18  
19  
20  
21  
22  
23  
24  
25  
26  
27  
28  
29  
30  
31  
32  
33  
34  
35  
36  
37  
38  
39  
40  
41  
42  
43  
44  
45  
46  
47  
48  
49  
50  
51  
52  
53  
54  
55  
56  
57  
58  
59  
60

For peer review only

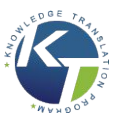

**St. Michael's**

Inspired Care.  
Inspiring Science.

For peer review only - <http://bmjopen.bmj.com/site/about/guidelines.xhtml>
