# Supplementary material for: Intersectoral and integrated approaches in achieving the right to health for refugees on resettlement: a scoping review
Source: PubMed Central journal article supplement — BMJ Open. 2019 Jul 1;9(7):e029407. doi: 10.1136/bmjopen-2019-029407 (PMC6609038; doi:10.1136/bmjopen-2019-029407), 2019-07-01
Supplement: bmjopen-2019-029407supp001.pdf [file bmjopen-2019-029407supp001.pdf]

1 APPENDIX I

2 1. Medline (Ovid)

|                                                                                                                                                                                                                                                                                                                                                                                                                                                                                                                                                                                                                                                                                                                                                                                                                                                                                                                                                                                                                                                                                                                                                                                                                                                                                                                                                                                                                                                                                                                                                                                                                                                                                                                |                                                                                                                                   |
|----------------------------------------------------------------------------------------------------------------------------------------------------------------------------------------------------------------------------------------------------------------------------------------------------------------------------------------------------------------------------------------------------------------------------------------------------------------------------------------------------------------------------------------------------------------------------------------------------------------------------------------------------------------------------------------------------------------------------------------------------------------------------------------------------------------------------------------------------------------------------------------------------------------------------------------------------------------------------------------------------------------------------------------------------------------------------------------------------------------------------------------------------------------------------------------------------------------------------------------------------------------------------------------------------------------------------------------------------------------------------------------------------------------------------------------------------------------------------------------------------------------------------------------------------------------------------------------------------------------------------------------------------------------------------------------------------------------|-----------------------------------------------------------------------------------------------------------------------------------|
| Date of Search: 2016-11-03<br>Number of hits: 2019<br>Comments:                                                                                                                                                                                                                                                                                                                                                                                                                                                                                                                                                                                                                                                                                                                                                                                                                                                                                                                                                                                                                                                                                                                                                                                                                                                                                                                                                                                                                                                                                                                                                                                                                                                | Field labels:<br>.tw,kf. = title, abstract, keyword<br>exp/ = MeSH, exploded<br>/ = MeSH, not exploded<br>adj3 = within two words |
| <p>1. Refugees/<br/>2. exp "Emigrants and Immigrants"/<br/>3. "Emigration and Immigration"/<br/>4. "Transients and Migrants"/<br/>5. (refugee* or immigra* or migrat* or migrant* or asylum* or transient*).tw,kf.<br/>6. or/1-5</p> <p>7. Delivery of Health Care/<br/>8. Health Services Accessibility/<br/>9. Patient Acceptance of Health Care/<br/>10. "Health Services Needs and Demand"/<br/>11. Quality of Health Care/<br/>12. Interinstitutional Relations/<br/>13. Interdepartmental Relations/<br/>14. Public-Private Sector Partnerships/<br/>15. ((health care or healthcare or health service*) adj3 (access* or availab* or barrier* or deliver* or need* or provision* or seeking or quality or utilization)).tw,kf.<br/>16. ((multisector* or multi-sector* or intersector* or inter-sector* or crosssector* or cross-sector* or interdisciplinary or inter-disciplinary or multidisciplinary or multi-disciplinary or interinstitution* or inter-institution* or interdepartment* or inter-department*) adj3 (analysis or collaborat* or cooperat* or co-operat* or approach* or partnership* or relation*)).tw,kf.<br/>17. or/7-16</p> <p>18. Healthcare Disparities/<br/>19. Social Determinants of Health/<br/>20. Health Status Disparities/<br/>21. Health Equity/<br/>22. exp Human Rights/<br/>23. ((health or health care or healthcare or health service*) adj3 (situation or difference*)).tw,kf.<br/>24. (disparit* or equity or equities or inequity or inequities or equalit* or inequalit* or right* or injustice* or discrimination* or determinant* or disadvantage* or vulnerab*).tw,kf.<br/>25. or/18-24<br/>26. 6 and 17 and 25</p> <p>27. Remove duplicates from 26</p> |                                                                                                                                   |

28. limit 27 to yr="2000 -Current"

3  
4  
5

## 2. Web of Science (Thomson Reuter)

Date of Search: 2016-11-03  
Number of hits: 1.166  
Comments:

Field labels:  
TOPIC = title, abstract, keywords  
NEAR/3 = within 3 words

#1 TOPIC: (refugee\* or immigra\* or migrat\* or migrant\* or asylum\* or transient\*)

#2 TOPIC: (("health care" or healthcare or "health service\*") NEAR/3 (access\* or availab\* or barrier\* or deliver\* or need\* or provision\* or seeking or quality or utilization))

#3 TOPIC: ((multisector\* or multi-sector\* or intersector\* or inter-sector\* or crosssector\* or cross-sector\* or interdisciplinary or inter-disciplinary or multidisciplinary or multi-disciplinary or interinstitution\* or inter-institution\* or interdepartment\* or inter-department\*) NEAR/3 (analysis or collaborat\* or cooperat\* or co-operat\* or approach\* or partnership\* or relation\*))

#4 #3 OR #2

#5 TOPIC: ((health or "health care" or healthcare or "health service\*") NEAR/3 (situation or difference\*))

#6 TOPIC: (disparit\* or equity or equities or inequity or inequities or equalit\* or inequalit\* or "human right\*" or "civil right\*" or "citizen\* right\*" or "social right\*" or injustice\* or discrimination\* or determinant\* or disadvantage\* or vulnerab\*)

#7 #6 OR #5

#8 #7 AND #4 AND #1

#9 Timespan: 2000-2016.

6  
7

## 3. Global Health (Ovid)

|                                                                                                                                                                                                                                                                                                                                                                                                                                                                                                                                                                                                                                                                                                                                                                                                                                                                                                                                                                                                                                                                                                                                                                                                                                                                                                       |                                                                                                                                                            |
|-------------------------------------------------------------------------------------------------------------------------------------------------------------------------------------------------------------------------------------------------------------------------------------------------------------------------------------------------------------------------------------------------------------------------------------------------------------------------------------------------------------------------------------------------------------------------------------------------------------------------------------------------------------------------------------------------------------------------------------------------------------------------------------------------------------------------------------------------------------------------------------------------------------------------------------------------------------------------------------------------------------------------------------------------------------------------------------------------------------------------------------------------------------------------------------------------------------------------------------------------------------------------------------------------------|------------------------------------------------------------------------------------------------------------------------------------------------------------|
| <p>Date of Search: 2016-11-03<br/> Number of hits: 497<br/> Comments:</p>                                                                                                                                                                                                                                                                                                                                                                                                                                                                                                                                                                                                                                                                                                                                                                                                                                                                                                                                                                                                                                                                                                                                                                                                                             | <p>Field labels:<br/> .ab,ti. = title, abstract<br/> exp/ =thesaurus term, exploded<br/> / = thesaurus term, not exploded<br/> adj3 = within two words</p> |
| <p>1. refugees/<br/> 2. immigrants/<br/> 3. migrants/<br/> 4. immigration/<br/> 5. (refugee* or immigra* or migrat* or migrant* or asylum* or transient*).ab,ti.<br/> 6. or/1-5</p> <p>7. health care utilization/<br/> 8. ((health care or healthcare or health service*) adj3 (access* or availab* or barrier* or deliver* or need* or provision* or seeking or quality or utilization)).ab,ti.<br/> 9. ((multisector* or multi-sector* or intersector* or inter-sector* or crosssector* or cross-sector* or interdisciplinary or inter-disciplinary or multidisciplinary or multi-disciplinary or interinstitution* or inter-institution* or interdepartment* or inter-department*) adj3 (analysis or collaborat* or cooperat* or co-operat* or approach* or partnership* or relation*)).ti,ab.<br/> 10. or/8-9</p> <p>11. exp disparity/<br/> 12. exp discrimination/<br/> 13. human rights/<br/> 14. ((health or health care or healthcare or health service*) adj3 (situation or difference*)).ti,ab.<br/> 15. (disparit* or equity or equities or inequity or inequities or equalit* or inequalit* or right* or injustice* or discrimination* or determinant* or disadvantage* or vulnerab*).ti,ab.<br/> 16. or/11-15</p> <p>17. 6 and 10 and 16</p> <p>18. limit 17 to yr="2000 -Current"</p> |                                                                                                                                                            |

## 4. PsycInfo (OVID)

|                                                                                                                                                                                                                                                                                                                                                                                                                                                                                                                                                                                                                                                                                                                                                                                                                                                                                                                                                                                                                                                                                                                                                                                                                                                                                                                                                                                                                                                                                        |                                                                                                                                                                           |
|----------------------------------------------------------------------------------------------------------------------------------------------------------------------------------------------------------------------------------------------------------------------------------------------------------------------------------------------------------------------------------------------------------------------------------------------------------------------------------------------------------------------------------------------------------------------------------------------------------------------------------------------------------------------------------------------------------------------------------------------------------------------------------------------------------------------------------------------------------------------------------------------------------------------------------------------------------------------------------------------------------------------------------------------------------------------------------------------------------------------------------------------------------------------------------------------------------------------------------------------------------------------------------------------------------------------------------------------------------------------------------------------------------------------------------------------------------------------------------------|---------------------------------------------------------------------------------------------------------------------------------------------------------------------------|
| <p>Date of Search: 2016-11-03<br/> Number of hits: 667<br/> Comments:</p>                                                                                                                                                                                                                                                                                                                                                                                                                                                                                                                                                                                                                                                                                                                                                                                                                                                                                                                                                                                                                                                                                                                                                                                                                                                                                                                                                                                                              | <p>Field labels:<br/> .ti,ab,id. = title, abstract, keyword<br/> exp/ = subject heading, exploded<br/> / = subject heading, not exploded<br/> adj3 = within two words</p> |
| <p>1. exp Human Migration/<br/> 2. Immigration/<br/> 3. (refugee* or immigra* or migrat* or migrant* or asylum* or transient*).ti,ab,id.<br/> 4. or/1-3</p> <p>5. Health Care Delivery/<br/> 6. Health Care Utilization/<br/> 7. Health Care Seeking Behavior/<br/> 8. Health Service Needs/<br/> 9. "Quality of Care"/<br/> 10. ((health care or healthcare or health service*) adj3 (access* or availab* or barrier* or deliver* or need* or provision* or seeking or quality or utilization)).ti,ab,id.<br/> 11. ((multisector* or multi-sector* or intersector* or inter-sector* or crosssector* or cross-sector* or interdisciplinary or inter-disciplinary or multidisciplinary or multi-disciplinary or interinstitution* or inter-institution* or interdepartment* or inter-department*) adj3 (analysis or collaborat* or cooperat* or co-operat* or approach* or partnership* or relation*)).ti,ab,id.<br/> 12. or/5-11</p> <p>13. Health Disparities/<br/> 14. Social Equality/<br/> 15. exp Human Rights/<br/> 16. ((health or health care or healthcare or health service*) adj3 (situation or difference*)).ti,ab,id.</p> <p>17. (disparit* or equity or equities or inequity or inequities or equalit* or inequalit* human right* or civil right* or citizen* right* or social right* or injustice* or discrimination* or determinant* or disadvantage* or vulnerab*).ti,ab,id.<br/> 18. or/13-17</p> <p>19. 4 and 12 and 18<br/> 20. limit 19 to yr="2000 -Current"</p> |                                                                                                                                                                           |

12

13

14

15

16
